# Supplementary material for: Feasibility of controlled nitric oxide generation via ascorbate induced chemical reduction of nitrite ions
Source: Royal Society of Chemistry journal article supplement (doi:10.1039/d4dt01980f), 2024-11-15
Supplement: d4dt01980f1.pdf [file d4dt01980f1.pdf]

## Supplemental information for

# Feasibility of controlled nitric oxide generation via ascorbate induced chemical reduction of nitrite ions

Hannah J. Naldrett,<sup>a</sup> Csilla Fekete,<sup>b</sup> Robert H. Bartlett,<sup>c</sup> Zoltán Benkő,<sup>b,d</sup> Steven P. Schwendeman<sup>\*a,e,f</sup> and Gergely Lautner<sup>\*a</sup>

<sup>a</sup> Department of Pharmaceutical Sciences, University of Michigan, Ann Arbor, MI 48109, USA.

<sup>b</sup> Department of Inorganic and Analytical Chemistry, Budapest University of Technology and Economics, Budapest, Hungary

<sup>c</sup> Department of Surgery, ECLS Laboratory, University of Michigan Medical School, Ann Arbor, MI 48109, USA

<sup>d</sup> HUN-REN—BME Computation Driven Chemistry Research Group, Budapest, Hungary

<sup>e</sup> Biointerfaces Institute, University of Michigan, Ann Arbor, MI 48109, USA.

<sup>f</sup> Department of Biomedical Engineering, University of Michigan, Ann Arbor, MI 48109, USA.

\* Corresponding authors

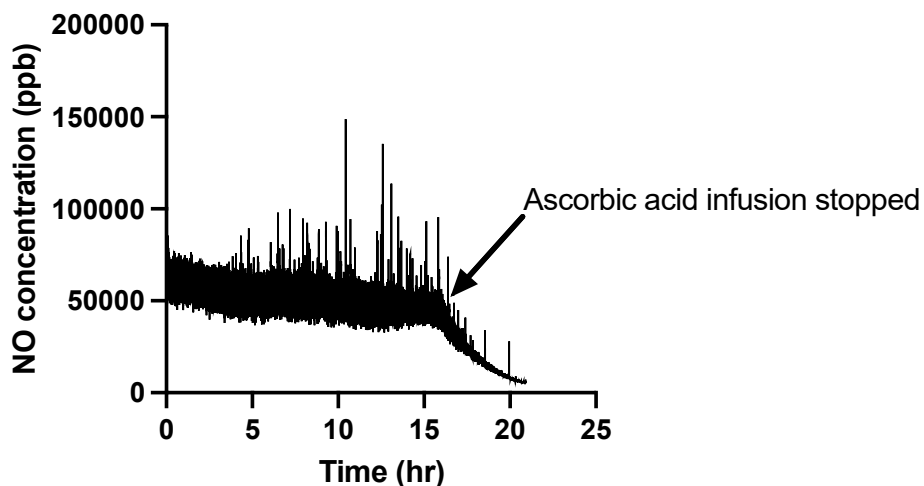

Figure S1. NO generation with ascorbic acid infused into electrolyte is sluggish. Infusion of 1 mL of 0.28 M ascorbic acid infused at 1  $\mu\text{L}/\text{min}$  into 5 mL of electrolyte containing 1 M  $\text{NaNO}_2$ .

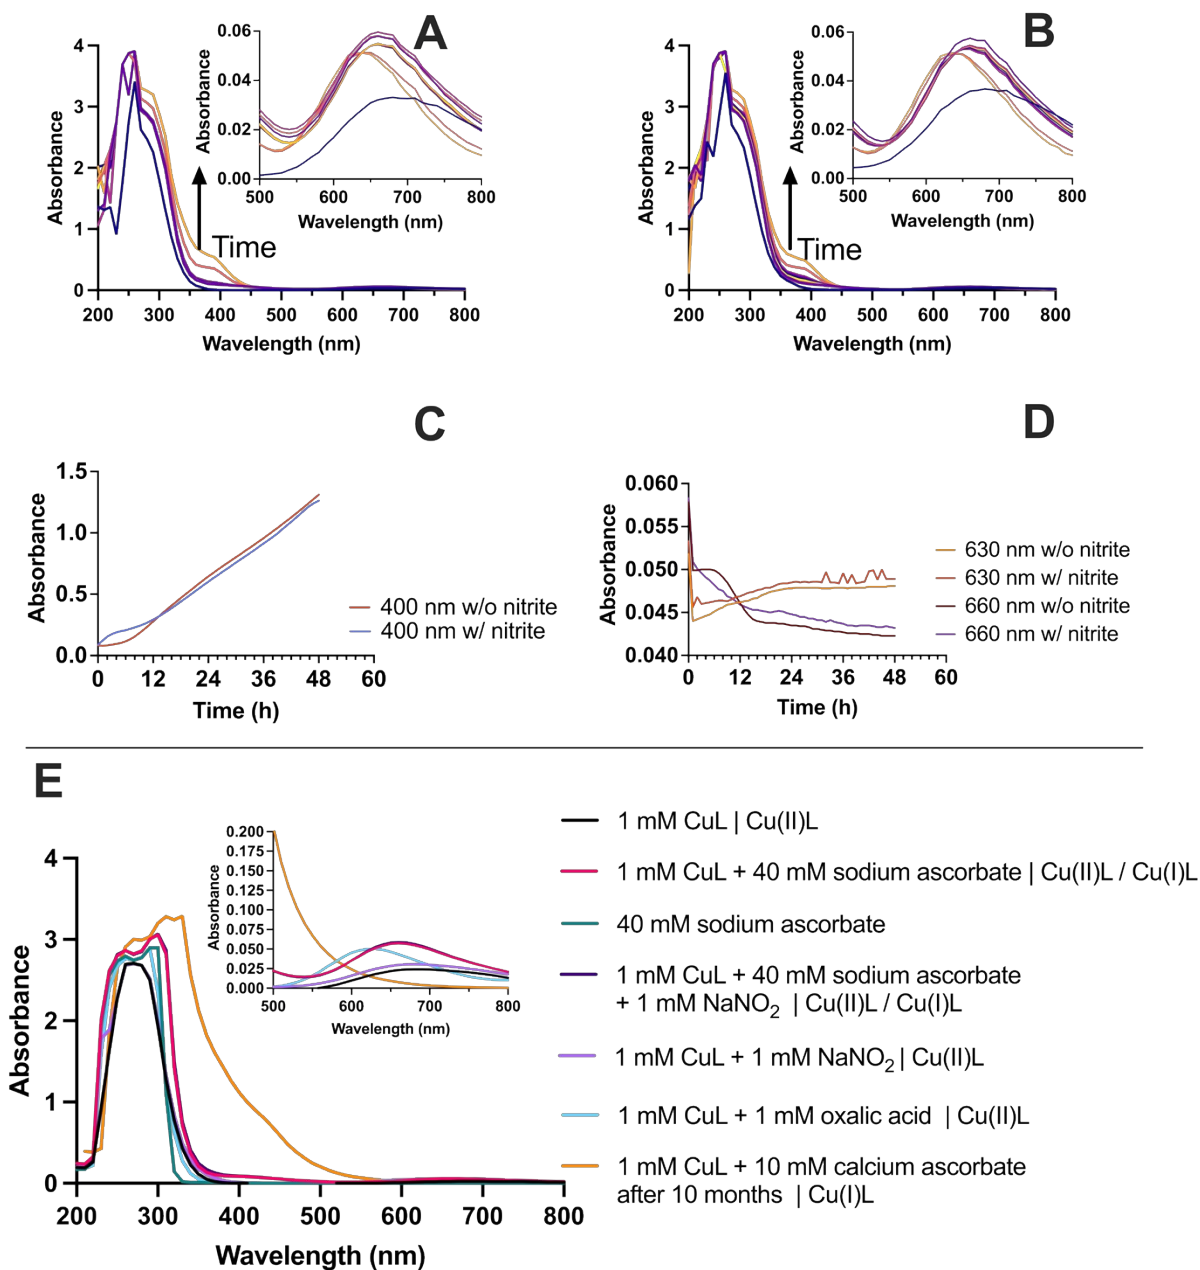

Figure S2. UV-vis spectra of deoxygenated electrolyte before and after addition of ascorbate over time (0 min, 10 min, 20 min, 30 min, 1 h, 2 h, 3 h, 4 h, 24 h, 48 h) (A) in the absence and (B) presence of nitrite ions. Insets show the visible (500-800 nm) range. Absorbance change of the electrolyte at (C) 400 nm and (D) 630 nm and 660 nm with and without nitrite. (E) UV-vis spectra of different electrolyte compositions in 0.5 M MES pH 5.8, exposed to air. Legend shows the individual components of electrolyte, where CuL represents Cu(II)L; the composition may change after mixing the components, as noted.

Table S1. The structures of the investigated complexes at  $\omega$ B97X-D/def2SVP level.

| Name                                                                                                                                                                                                                        | Structure                                                                            |
|-----------------------------------------------------------------------------------------------------------------------------------------------------------------------------------------------------------------------------|--------------------------------------------------------------------------------------|
| <p><b>[Cu(I)L]<sup>+</sup></b></p> <p>Selected wavelengths:</p> <p>376.14 nm (f = 0.01)</p> <p>228.44 nm (f = 0.01)</p> <p>228.39 nm (f = 0.01)</p> <p>216.66 nm (f = 0.04)</p>                                             | 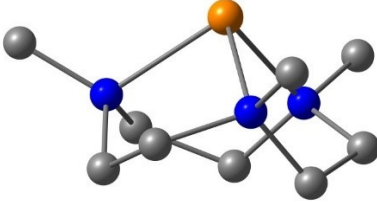   |
| <p><b>[Cu(I)L(H<sub>2</sub>O)]<sup>+</sup></b></p> <p>Selected wavelengths:</p> <p>207.38 nm (f = 0.01)</p> <p>202.54 nm (f = 0.01)</p> <p>200.37 nm (f = 0.01)</p> <p>199.78 nm (f = 0.01)</p> <p>198.94 nm (f = 0.01)</p> |   |
| <p><b>[Cu(I)LHAsc]<sup>+</sup></b></p> <p>Selected wavelengths:</p> <p>344.97 nm (f = 0.01)</p> <p>303.59 nm (f = 0.05)</p> <p>274.26 nm (f = 0.03)</p> <p>258.64 nm (f = 0.01)</p> <p>235.47 nm (f = 0.04)</p>             |  |

**[Cu(I)LDHA]<sup>+</sup>**

Selected wavelengths:

828.59 nm (f = 0.01)

686.54 nm (f = 0.15)

566.75 nm (f = 0.06)

402.51 nm (f = 0.01)

367.25 nm (f = 0.02)

318.00 nm (f = 0.01)

299.75 nm (f = 0.02)

279.60 nm (f = 0.01)

271.87 nm (f = 0.06)

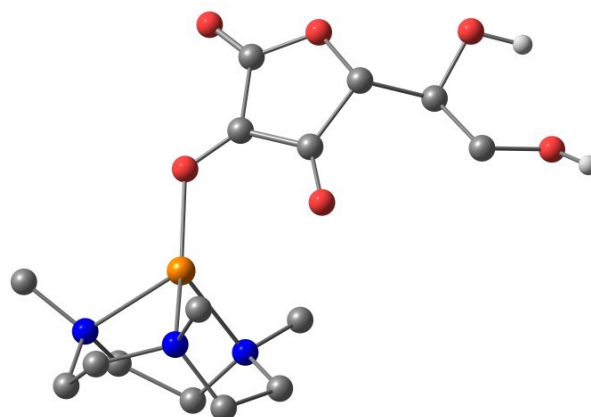**[Cu(II)L]<sup>2+</sup>**

Selected wavelengths:

529.57 nm (f = 0.03)

425.46 nm (f = 0.06)

347.12 nm (f = 0.02)

304.90 nm (f = 0.01)

295.01 nm (f = 0.01)

282.31 nm (f = 0.01)

280.25 nm (f = 0.01)

229.70 nm (f = 0.01)

222.94 nm (f = 0.01)

229.70 nm (f = 0.01)

213.74 nm (f = 0.04)

212.48 nm (f = 0.01)

202.02 nm (f = 0.01)

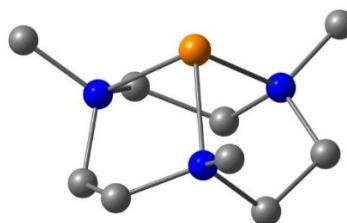

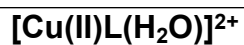

Selected wavelengths:

439.70 nm (f = 0.06)

407.11 nm (f = 0.03)

335.46 nm (f = 0.04)

260.56 nm (f = 0.01)

258.23 nm (f = 0.01)

257.29 nm (f = 0.01)

211.92 nm (f = 0.01)

204.42 nm (f = 0.01)

176.54 nm (f = 0.02)

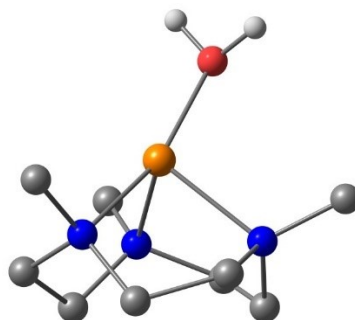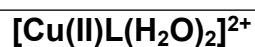

Selected wavelengths:

432.28 nm (f = 0.01)

368.88 nm (f = 0.07)

319.14 nm (f = 0.07)

244.88 nm (f = 0.01)

240.91 nm (f = 0.01)

233.5 nm (f = 0.01)

193.64 nm (f = 0.01)

189.86 nm (f = 0.01)

176.29 nm (f = 0.01)

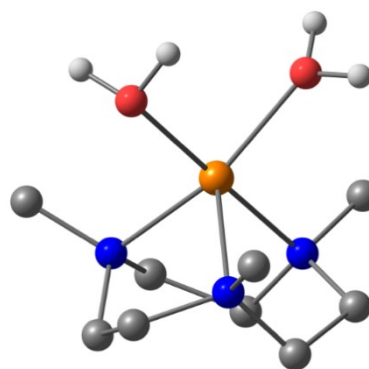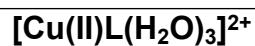

Selected wavelengths:

348.80 nm (f = 0.09)

310.91 nm (f = 0.08)

221.37 nm (f = 0.01)

214.29 nm (f = 0.01)

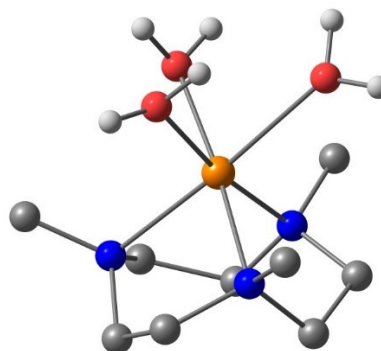

|                                                                                                                                                                                                                                                                          |                                                                                      |
|--------------------------------------------------------------------------------------------------------------------------------------------------------------------------------------------------------------------------------------------------------------------------|--------------------------------------------------------------------------------------|
| <p><b>[Cu(II)LAsc], conformer 1</b></p> <p>Selected wavelengths:</p> <p>745.35 nm (f = 0.01)</p> <p>656.06 nm (f = 0.05)</p> <p>340.35 nm (f = 0.01)</p> <p>317.40 nm (f = 0.03)</p> <p>262.51 nm (f = 0.01)</p> <p>260.31 nm (f = 0.01)</p>                             | 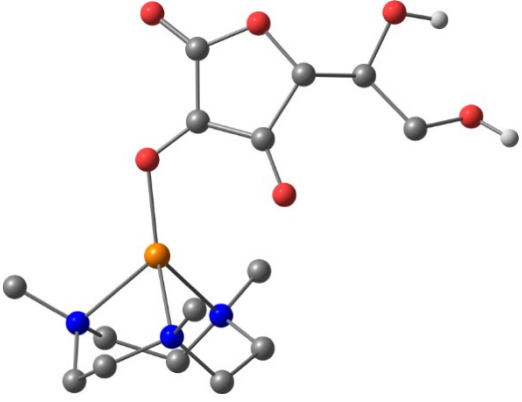   |
| <p><b>[Cu(II)LAsc], conformer 2</b></p> <p>Selected wavelengths:</p> <p>595.80 nm (f = 0.01)</p> <p>365.97 nm (f = 0.07)</p> <p>298.34 nm (f = 0.01)</p> <p>285.00 nm (f = 0.01)</p> <p>272.68 nm (f = 0.08)</p> <p>268.98 nm (f = 0.04)</p> <p>261.93 nm (f = 0.01)</p> |   |
| <p><b>[Cu(II)LAsc], conformer 3</b></p> <p>Selected wavelengths:</p> <p>676.81 nm (f = 0.01)</p> <p>468.92 nm (f = 0.07)</p> <p>382.59 nm (f = 0.01)</p> <p>378.17 nm (f = 0.07)</p> <p>345.49 nm (f = 0.01)</p> <p>294.52 nm (f = 0.01)</p> <p>267.27 nm (f = 0.04)</p> |  |

**[Cu(II)LHAsc]<sup>+</sup>**

Selected wavelengths:

650.41 nm (f = 0.08)

617.40 nm (f = 0.10)

372.38 nm (f = 0.01)

365.17 nm (f = 0.02)

324.70 nm (f = 0.03)

309.37 nm (f = 0.03)

280.62 nm (f = 0.02)

235.81 nm (f = 0.19)

226.49 nm (f = 0.02)

215.51 nm (f = 0.01)

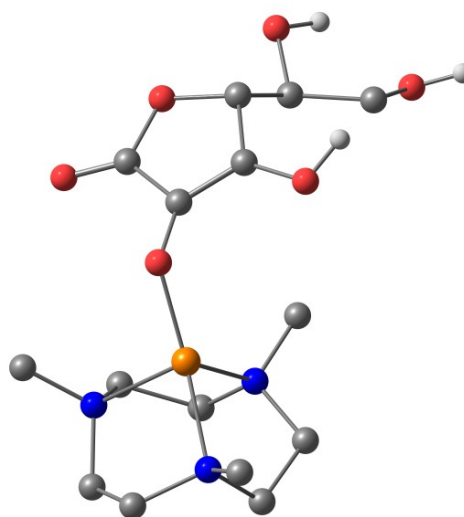

**[Cu(II)LDHA]<sup>2+</sup>**

Selected wavelengths:

895.07 nm (f = 0.02)

441.38 nm (f = 0.03)

414.81 nm (f = 0.01)

381.71 nm (f = 0.01)

374.04 nm (f = 0.01)

366.14 nm (f = 0.04)

342.66 nm (f = 0.04)

335.37 nm (f = 0.08)

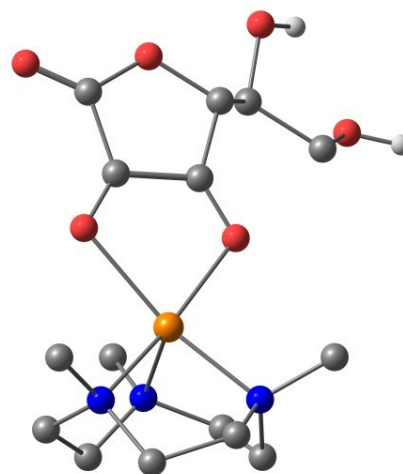

**[Cu(I)LNO<sub>2</sub>], conformer 1**

Selected wavelengths:

349.13 nm (f = 0.05)

231.61 nm (f = 0.01)

230.53 nm (f = 0.01)

223.11 nm (f = 0.01)

222.95 nm (f = 0.01)

219.04 nm (f = 0.01)

204.38 nm (f = 0.01)

203.65 nm (f = 0.01)

199.87 nm (f = 0.02)

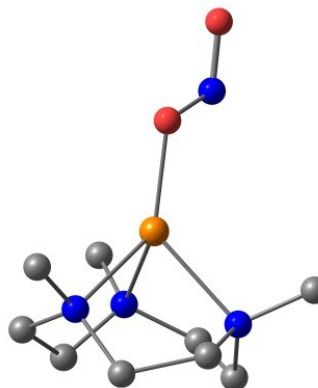

**[Cu(I)LNO<sub>2</sub>], conformer 2**

Selected wavelengths:

391.78 nm (f = 0.01)

300.27 nm (f = 0.05)

286.20 nm (f = 0.02)

273.82 nm (f = 0.01)

268.92 nm (f = 0.01)

263.55 nm (f = 0.01)

227.21 nm (f = 0.01)

205.44 nm (f = 0.01)

197.05 nm (f = 0.01)

193.49 nm (f = 0.01)

188.52 nm (f = 0.01)

186.66 nm (f = 0.01)

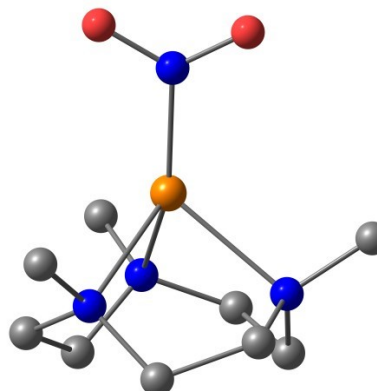



**[Cu(II)LNO<sub>2</sub>]<sup>+</sup>, conformer 1**

Selected wavelengths:

837.18 nm (f = 0.02)

387.70 nm (f = 0.11)

363.02 nm (f = 0.03)

361.24 nm (f = 0.02)

360.00 nm (f = 0.03)

333.54 nm (f = 0.01)

255.88 nm (f = 0.01)

222.77 nm (f = 0.01)

220.82 nm (f = 0.01)

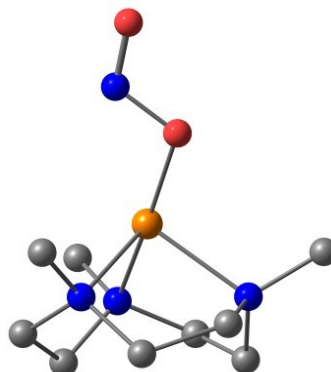**[Cu(II)LNO<sub>2</sub>]<sup>+</sup>, conformer 2**

Selected wavelengths:

562.20 nm (f = 0.01)

542.95 nm (f = 0.01)

430.29 nm (f = 0.11)

356.42 nm (f = 0.01)

341.30 nm (f = 0.03)

330.81 nm (f = 0.01)

309.31 nm (f = 0.01)

305.02 nm (f = 0.02)

302.61 nm (f = 0.02)

259.66 nm (f = 0.01)

257.34 nm (f = 0.01)

208.38 nm (f = 0.01)

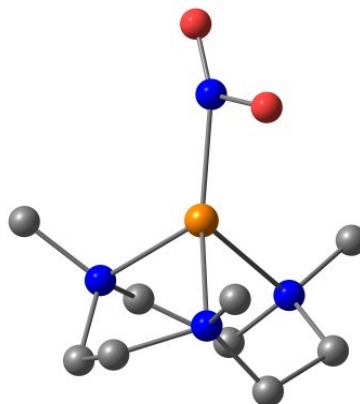

a)

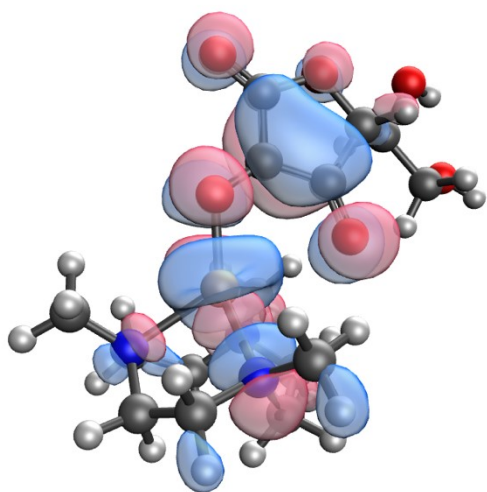

HOMO

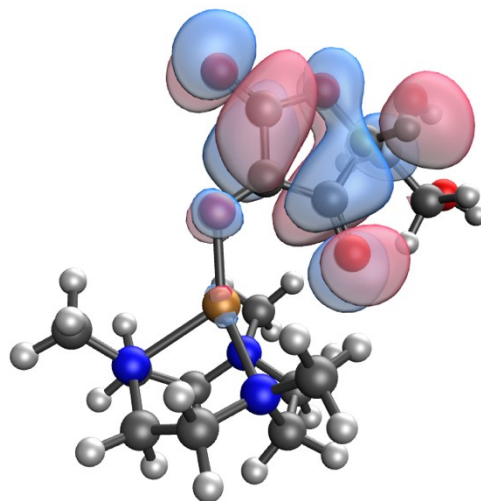

LUMO

b)

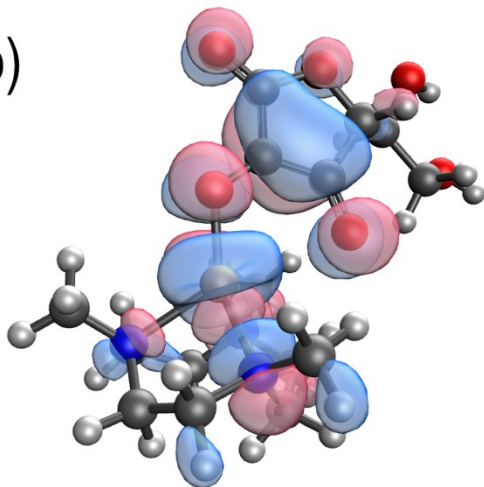

HOMO

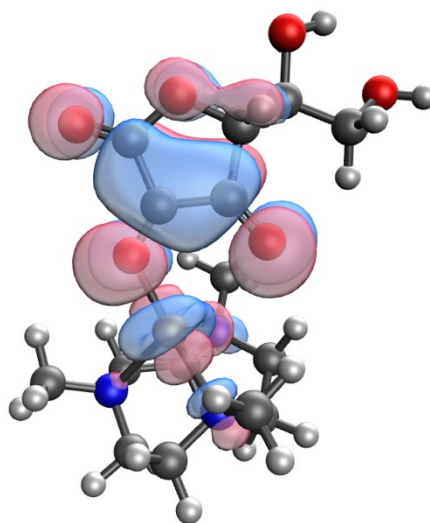

LUMO

Figure S3. The HOMO and the LUMO of the a)  $[\text{Cu}(\text{II})\text{L}(\text{Asc})]$ , conformer 1, b)  $[\text{Cu}(\text{I})\text{L}(\text{DHA})]^+$  at  $\omega\text{B97X-D/def2SVP}$  level, isovalue = 0.050.

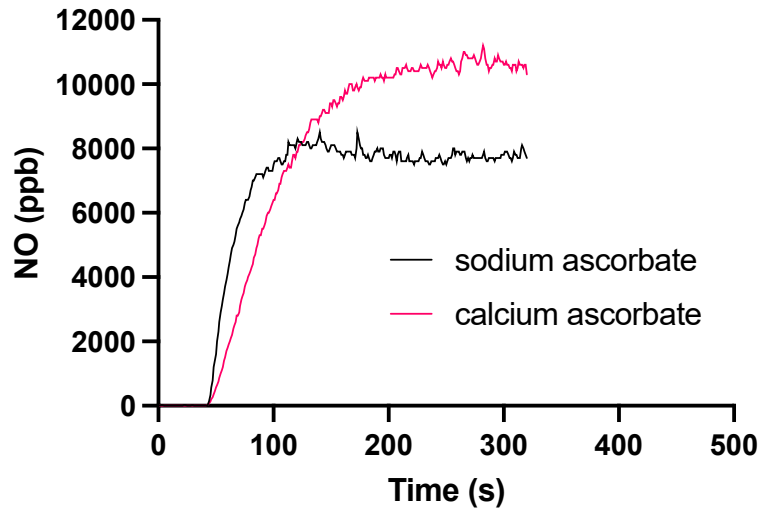

Figure S4: NO generation of electrolyte containing sodium ascorbate (280 mM) and calcium ascorbate (140 mM) infused with 15  $\mu\text{L}/\text{min}$  10 mM sodium nitrite.

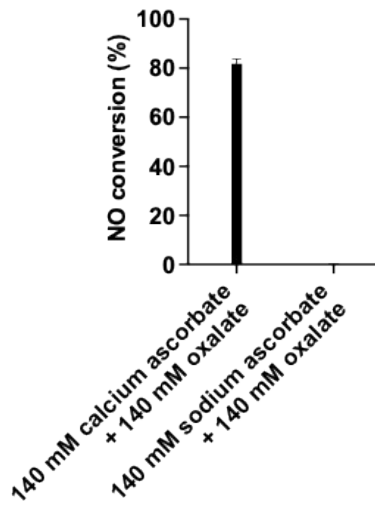

Figure S5. Oxalate present at a high initial concentration in the electrolyte stops nitrite conversion. The presence of 140 mM sodium oxalate dissolved into solution along with 140 mM sodium ascorbate prevents any nitrite conversion to NO from the bolus injection of 2  $\mu\text{L}$  of 10 mM sodium nitrite, as compared to the control with no added sodium oxalate.

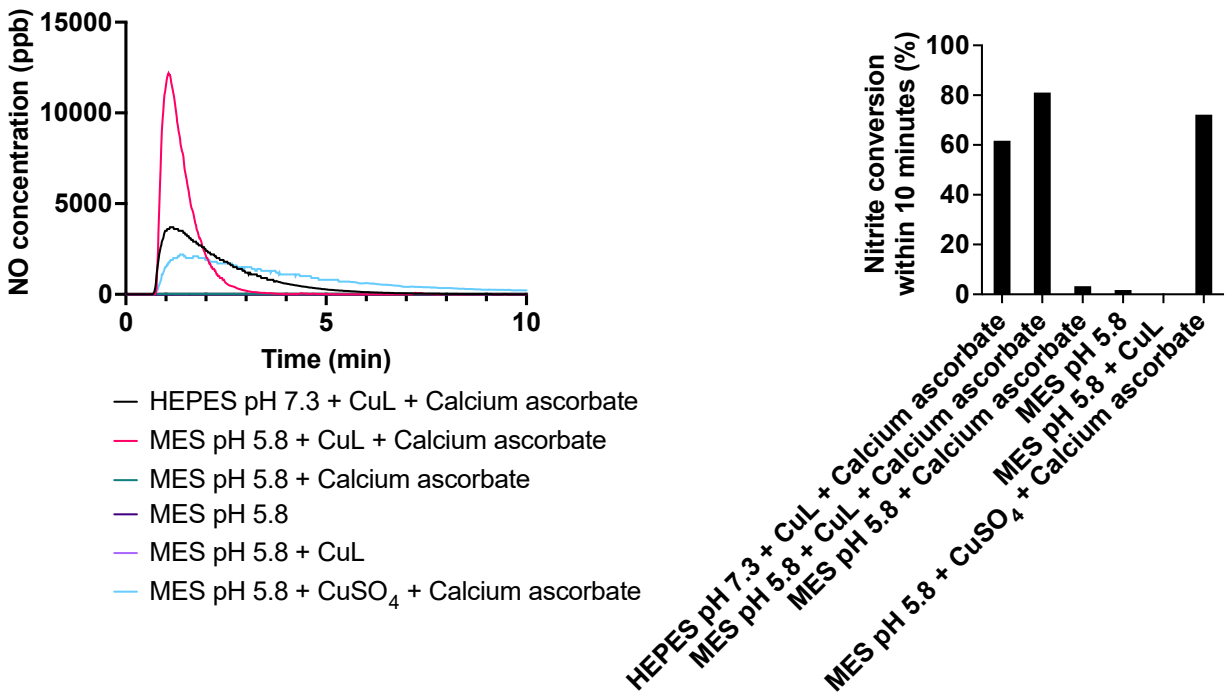

Figure S6. Generated NO concentrations (left) and nitrite conversion to NO (right) from different electrolyte compositions. 10  $\mu$ L of 10 mM sodium nitrite was injected into 5 mL of the specified electrolyte composition (when present, concentrations of the components are 7 mM CuL, 140 mM calcium ascorbate, and 7 mM copper sulfate).

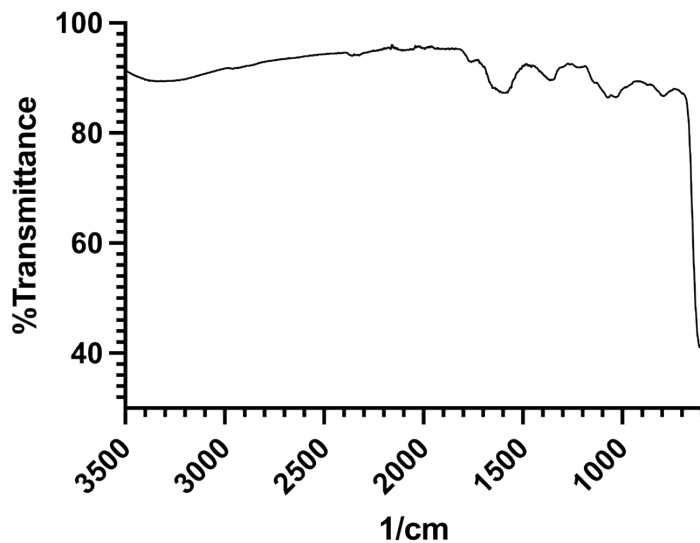

Figure S7. FT-IR ATR spectrum of the freeze dried yellow precipitate formed after mixing CuSO<sub>4</sub> and calcium ascorbate.

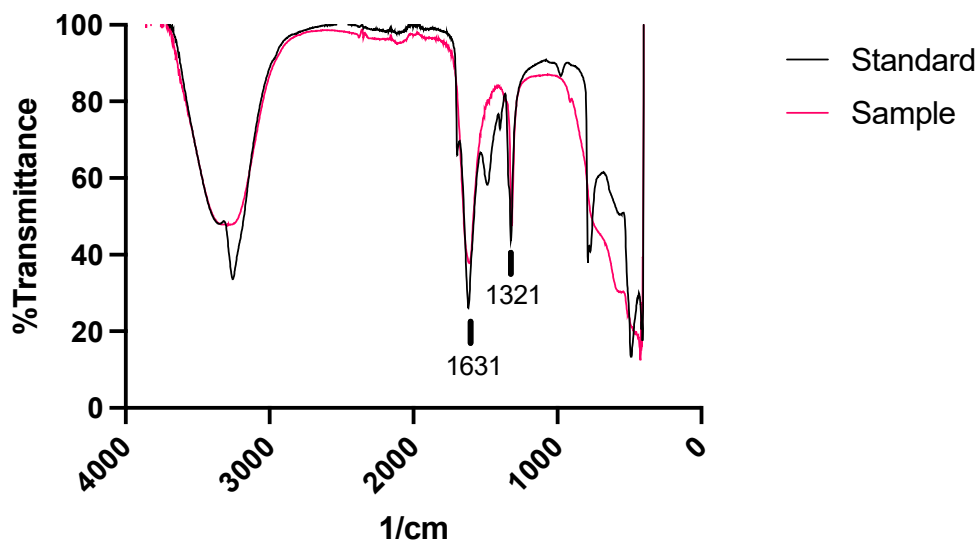

Figure S8. FT-IR ATR spectra of calcium oxalate standard (Standard) and the precipitate (Sample) formed with  $\text{Ca}^{2+}$  during the storage of the electrolyte. The asymmetric stretching ( $\nu_a$ ), symmetric stretching ( $\nu_s$ ) oxalate fundamental vibrations assigned to the bands at 1631 and 1321  $\text{cm}^{-1}$ , respectively.

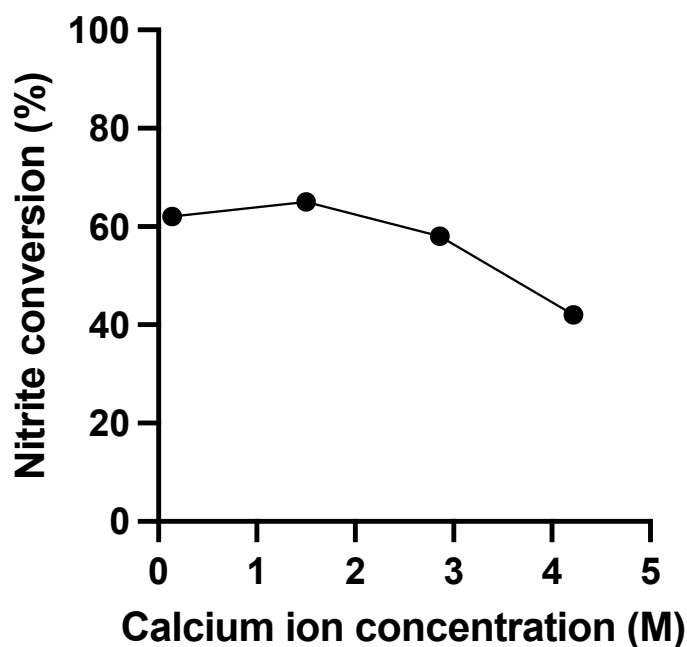

Figure S9. Very high concentrations of calcium ions will eventually deplete nitrite conversion to NO. 15  $\mu\text{L}/\text{min}$  of nitrite was infused to 5 mL of electrolyte containing 140 mM calcium ascorbate. One gram of calcium chloride was added by removing one mL of electrolyte from the reaction cell and dissolving the calcium chloride in it, then adding it back to the reaction cell. This was done once a plateau from the previous addition was reached.

Table S2. Summary of electrolyte optimization process.

| <b>Initial electrolyte components in reaction chamber</b>     | <b>NO generating addition</b> | <b>Major issue(s)</b>                               | <b>Expected source of the issues</b> | <b>Improvement</b>                                                                |
|---------------------------------------------------------------|-------------------------------|-----------------------------------------------------|--------------------------------------|-----------------------------------------------------------------------------------|
| <i>TACN, CuSO<sub>4</sub>, nitrite, HEPES pH 7.4</i>          | Ascorbic acid                 | Slow return to baseline                             | Cu(I) accumulation                   |                                                                                   |
| <i>TACN, CuSO<sub>4</sub>, sodium ascorbate, HEPES pH 7.4</i> | Nitrite                       | Short shelf life, slow and incomplete NO conversion | Oxalate accumulation due to high pH  | Infusing Nitrite greatly improved return to baseline                              |
| <i>TACN, CuSO<sub>4</sub>, sodium ascorbate, MES pH 5.8</i>   | Nitrite                       | Short shelf life                                    | Oxalate accumulation                 | Optimizing pH improved response time and conversion rate without proton mechanism |
| <i>TACN, CuSO<sub>4</sub>, calcium ascorbate, MES pH 5.8</i>  | Nitrite                       |                                                     |                                      | Added calcium ions to remove oxalate from solution                                |
| <i>TACN, CuSO<sub>4</sub>, glutathione, MES pH 5.8</i>        | Nitrite                       | Slow and incomplete NO conversion                   | Thiolate cluster formation           | None                                                                              |
| <i>TACN, CuSO<sub>4</sub>, cysteine, MES pH 5.8</i>           | Nitrite                       | Slow and incomplete NO conversion                   | Thiolate cluster formation           | None                                                                              |
| <i>CuSO<sub>4</sub>, calcium ascorbate, MES pH 5.8</i>        | Nitrite                       | NO was not produced                                 | Copper ions precipitate              | None                                                                              |

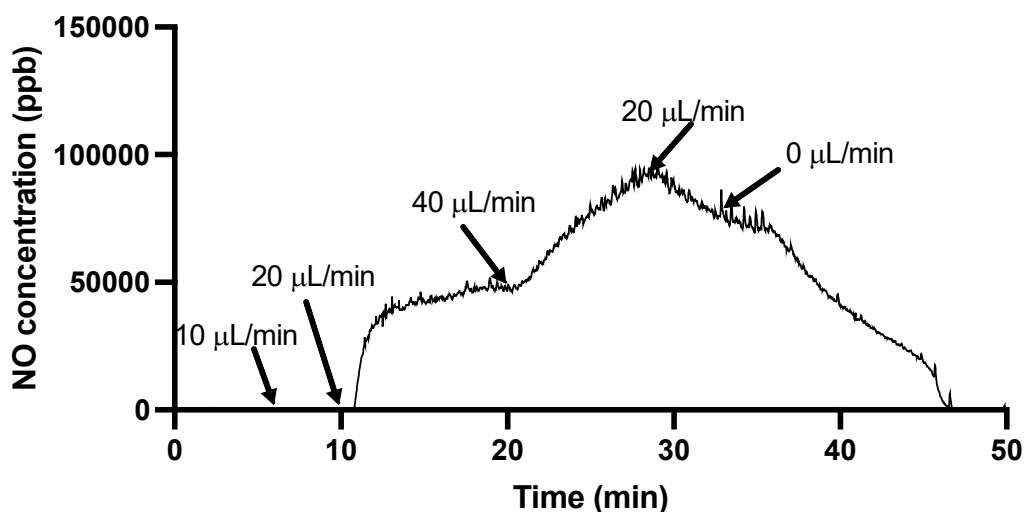

Figure S10. 10 mM calcium ascorbate infused into optimized electrolyte and 140 mM sodium nitrite results in sluggish NO generation and slow responsiveness.

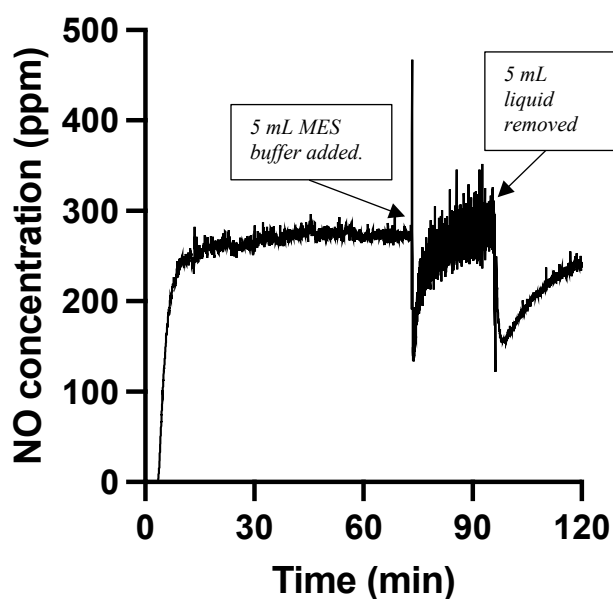

Figure S11. Noisier signal from increased water column. Nitrite (242 mM) was infused at 15  $\mu\text{L}/\text{min}$ . There is a part of the reaction cell where the needle is inserted via a septum that, as the water level rises within the cell, can trap NO until sufficient pressure builds up to release the NO. This results in higher spikes and lower dips as more pressure is needed to release the bubble. Additionally, there is likely some variation in the size of the  $\text{N}_2$  bubbles sparging the solution over time as a result of the increasing reaction chamber volume. This effect could have been responsible for the increase in NO signal noise observed with time.

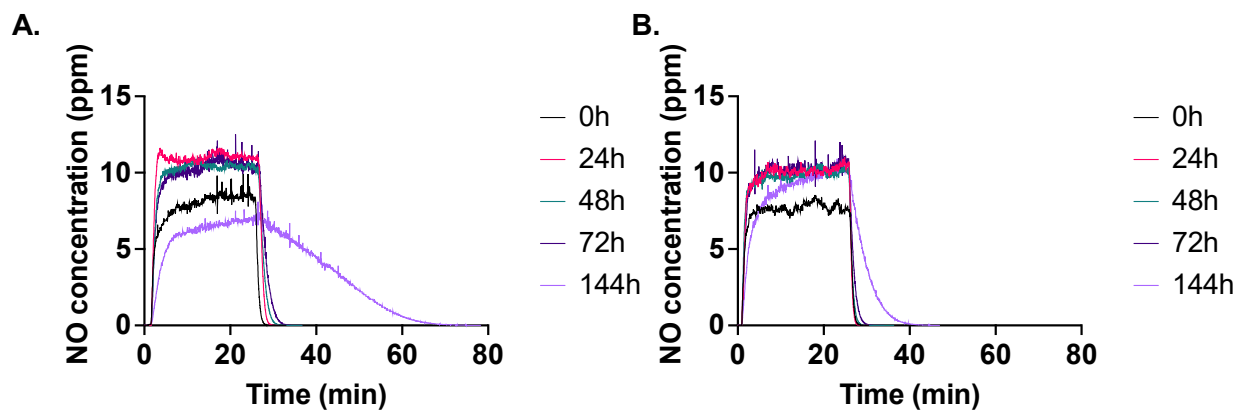

Figure S12: Storage stability of TACN-copper complex with calcium ascorbate concentration of 7 mM (A) and 35 mM (B) over six days. A total of 250  $\mu\text{L}$  of 10 mM  $\text{NaNO}_2$  was infused at 10  $\mu\text{L}/\text{min}$ . The  $\text{N}_2$  sparging rate was 0.15 L/min.

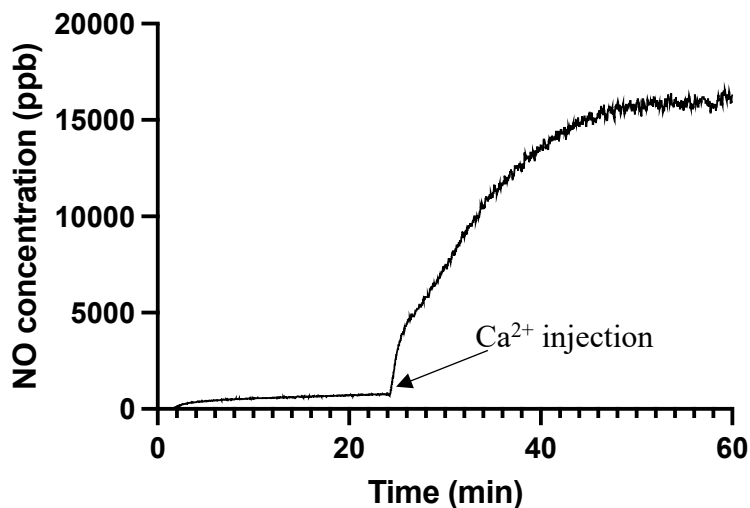

Figure S13: NO generation from continuous nitrite infusion (15  $\mu\text{L}/\text{min}$  10 mM) into electrolyte (1 mL, 1 M ascorbate, MES pH 5.8, 7 mM CuL) stored for 9 months. Electrolyte was stored at RT without light protection, without deoxygenation and without calcium ions. NO generation (flow rate: 200 mL/min) was restored with the addition of calcium ions (100 mL 192 mM  $\text{CaCl}_2$ ).



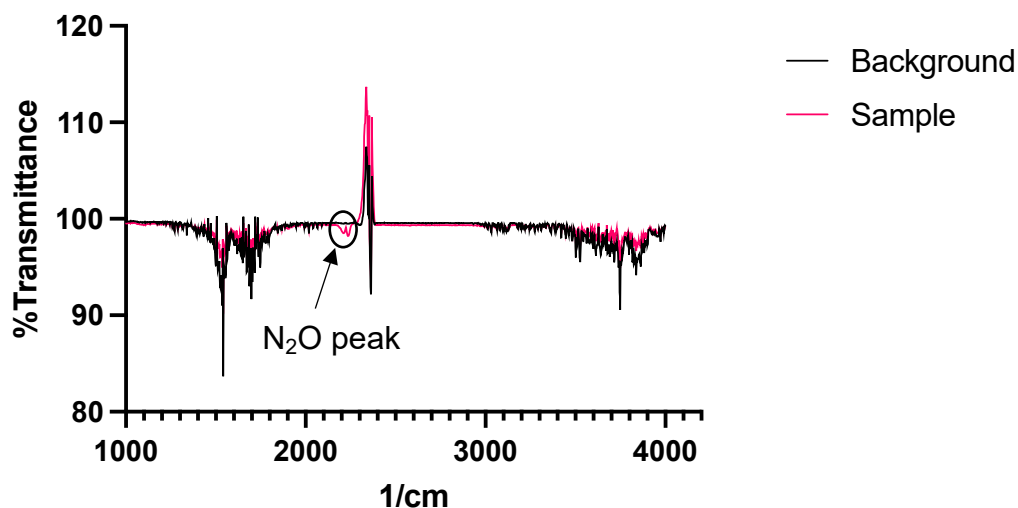

Figure S14. FT-IR spectra of the generated gas from the reaction cell containing 25 mL of 7 mM [Cu(II)L]<sup>2+</sup>, 3.5 mM calcium ascorbate and 14 mM CaCl<sub>2</sub> before (black) and after (pink) the addition of 1 mL of 10 mM NaNO<sub>2</sub>.

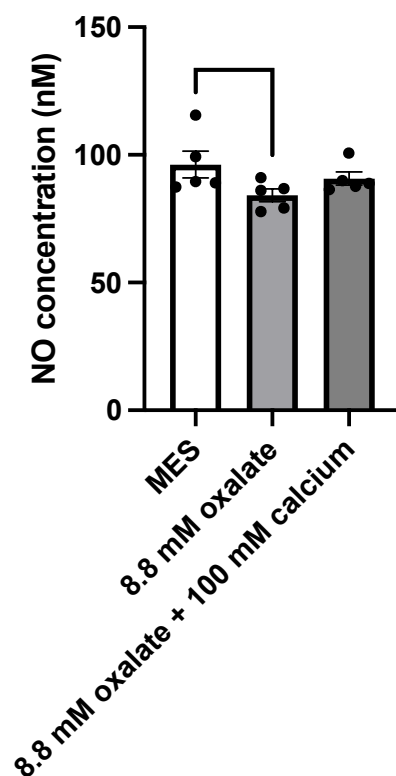

Figure S15. The presence of oxalate in a buffered solution scavenges injected NO gas. 10 mL of DI water was deoxygenated by vigorous sparging with N<sub>2</sub> gas, then 50 ppm of 50 mL/min NO(g) in N<sub>2</sub> was sparged through this deoxygenated water. 200 μL of the NO solution was injected through a Hamilton syringe into a glass reaction cell containing 5 mL of the specified buffered salts.

## Time dependent DFT calculations (at B3LYP/def2SVP// $\omega$ B97X-D/def2SVP level)

### [Cu(I)L]<sup>+</sup>

Excitation energies and oscillator strengths:

Excited State 1: Singlet-A 2.4449 eV 507.11 nm f=0.0002 <S\*\*2>=0.000  
62 -> 63 0.69792

This state for optimization and/or second-order correction.

Total Energy, E(TD-HF/TD-DFT) = -2159.51927131

Copying the excited state density for this state as the 1-particle RhoCI density.

Excited State 2: Singlet-A 2.4455 eV 506.99 nm f=0.0002 <S\*\*2>=0.000  
61 -> 63 0.69792

Excited State 3: Singlet-A 3.1802 eV 389.86 nm f=0.0018 <S\*\*2>=0.000  
60 -> 63 0.70034

Excited State 4: Singlet-A 3.1804 eV 389.84 nm f=0.0018 <S\*\*2>=0.000  
59 -> 63 0.70034

Excited State 5: Singlet-A 3.2962 eV 376.14 nm f=0.0062 <S\*\*2>=0.000  
58 -> 63 0.70307

Excited State 6: Singlet-A 5.4275 eV 228.44 nm f=0.0110 <S\*\*2>=0.000  
56 -> 63 0.68167

Excited State 7: Singlet-A 5.4286 eV 228.39 nm f=0.0110 <S\*\*2>=0.000  
55 -> 63 0.68162

Excited State 8: Singlet-A 5.7225 eV 216.66 nm f=0.0426 <S\*\*2>=0.000  
57 -> 63 0.69094

Excited State 9: Singlet-A 5.7731 eV 214.76 nm f=0.0009 <S\*\*2>=0.000  
61 -> 65 -0.32167  
61 -> 66 0.36616  
62 -> 65 0.37680  
62 -> 66 0.32913

Excited State 10: Singlet-A 5.7916 eV 214.08 nm f=0.0017 <S\*\*2>=0.000  
61 -> 65 0.28455  
62 -> 64 0.57040  
62 -> 66 0.27330

|                   |           |           |           |          |              |
|-------------------|-----------|-----------|-----------|----------|--------------|
| Excited State 11: | Singlet-A | 5.7929 eV | 214.03 nm | f=0.0017 | <S**2>=0.000 |
| 61 -> 64          | 0.56756   |           |           |          |              |
| 61 -> 66          | -0.28963  |           |           |          |              |
| 62 -> 65          | 0.27343   |           |           |          |              |
| Excited State 12: | Singlet-A | 5.8163 eV | 213.17 nm | f=0.0103 | <S**2>=0.000 |
| 61 -> 64          | -0.39410  |           |           |          |              |
| 61 -> 66          | -0.40076  |           |           |          |              |
| 62 -> 65          | 0.40606   |           |           |          |              |
| Excited State 13: | Singlet-A | 5.8170 eV | 213.14 nm | f=0.0103 | <S**2>=0.000 |
| 61 -> 65          | 0.40405   |           |           |          |              |
| 62 -> 64          | -0.39015  |           |           |          |              |
| 62 -> 66          | 0.40629   |           |           |          |              |
| Excited State 14: | Singlet-A | 5.8878 eV | 210.58 nm | f=0.0025 | <S**2>=0.000 |
| 57 -> 63          | 0.12317   |           |           |          |              |
| 61 -> 65          | 0.36700   |           |           |          |              |
| 61 -> 66          | 0.32594   |           |           |          |              |
| 62 -> 65          | 0.32314   |           |           |          |              |
| 62 -> 66          | -0.36445  |           |           |          |              |
| Excited State 15: | Singlet-A | 6.0909 eV | 203.56 nm | f=0.0021 | <S**2>=0.000 |
| 62 -> 67          | 0.70071   |           |           |          |              |
| Excited State 16: | Singlet-A | 6.0915 eV | 203.54 nm | f=0.0021 | <S**2>=0.000 |
| 61 -> 67          | 0.70072   |           |           |          |              |
| Excited State 17: | Singlet-A | 6.7342 eV | 184.11 nm | f=0.0000 | <S**2>=0.000 |
| 60 -> 66          | 0.39403   |           |           |          |              |
| Excited State 18: | Singlet-A | 6.7715 eV | 183.10 nm | f=0.0042 | <S**2>=0.000 |
| 59 -> 65          | -0.29933  |           |           |          |              |
| 59 -> 66          | 0.39518   |           |           |          |              |
| 60 -> 65          | -0.38846  |           |           |          |              |
| 60 -> 66          | -0.29065  |           |           |          |              |
| Excited State 19: | Singlet-A | 6.7795 eV | 182.88 nm | f=0.0067 | <S**2>=0.000 |
| 59 -> 66          | 0.47627   |           |           |          |              |
| 60 -> 65          | 0.48105   |           |           |          |              |
| Excited State 20: | Singlet-A | 6.7796 eV | 182.88 nm | f=0.0068 | <S**2>=0.000 |
| 59 -> 65          | -0.47805  |           |           |          |              |
| 60 -> 66          | 0.48323   |           |           |          |              |
| Excited State 21: | Singlet-A | 6.8107 eV | 182.04 nm | f=0.0003 | <S**2>=0.000 |

|                   |           |           |           |          |              |  |
|-------------------|-----------|-----------|-----------|----------|--------------|--|
| 58 -> 65          | -0.12487  |           |           |          |              |  |
| 60 -> 64          | 0.67932   |           |           |          |              |  |
| Excited State 22: | Singlet-A | 6.8110 eV | 182.04 nm | f=0.0004 | <S**2>=0.000 |  |
| 58 -> 66          | 0.13262   |           |           |          |              |  |
| 59 -> 64          | 0.67535   |           |           |          |              |  |
| Excited State 23: | Singlet-A | 6.8407 eV | 181.25 nm | f=0.0028 | <S**2>=0.000 |  |
| 58 -> 65          | 0.51764   |           |           |          |              |  |
| 58 -> 66          | -0.42618  |           |           |          |              |  |
| 59 -> 64          | 0.13575   |           |           |          |              |  |
| Excited State 24: | Singlet-A | 6.8408 eV | 181.24 nm | f=0.0027 | <S**2>=0.000 |  |
| 58 -> 65          | 0.42802   |           |           |          |              |  |
| 58 -> 66          | 0.51789   |           |           |          |              |  |
| 60 -> 64          | 0.13137   |           |           |          |              |  |
| Excited State 25: | Singlet-A | 6.8901 eV | 179.94 nm | f=0.0002 | <S**2>=0.000 |  |
| 58 -> 64          | 0.69698   |           |           |          |              |  |
| Excited State 26: | Singlet-A | 6.8980 eV | 179.74 nm | f=0.0000 | <S**2>=0.000 |  |
| 62 -> 68          | 0.69960   |           |           |          |              |  |
| Excited State 27: | Singlet-A | 6.8986 eV | 179.72 nm | f=0.0000 | <S**2>=0.000 |  |
| 61 -> 68          | 0.69963   |           |           |          |              |  |
| Excited State 28: | Singlet-A | 7.0983 eV | 174.67 nm | f=0.0002 | <S**2>=0.000 |  |
| 60 -> 67          | 0.69594   |           |           |          |              |  |
| Excited State 29: | Singlet-A | 7.0984 eV | 174.66 nm | f=0.0002 | <S**2>=0.000 |  |
| 59 -> 67          | 0.69596   |           |           |          |              |  |
| Excited State 30: | Singlet-A | 7.1853 eV | 172.55 nm | f=0.0042 | <S**2>=0.000 |  |
| 61 -> 69          | -0.30214  |           |           |          |              |  |
| 61 -> 70          | 0.36875   |           |           |          |              |  |
| 62 -> 69          | 0.40703   |           |           |          |              |  |
| 62 -> 70          | 0.29885   |           |           |          |              |  |

### **[Cu(I)L(H<sub>2</sub>O)]<sup>+</sup>**

Excitation energies and oscillator strengths:

|                  |           |           |           |          |              |
|------------------|-----------|-----------|-----------|----------|--------------|
| Excited State 1: | Singlet-A | 3.2049 eV | 386.86 nm | f=0.0002 | <S**2>=0.000 |
| 67 -> 68         | 0.69927   |           |           |          |              |

This state for optimization and/or second-order correction.

Total Energy, E(TD-HF/TD-DFT) = -2235.89219535

Copying the excited state density for this state as the 1-particle RhoCl density.

|               |          |           |           |           |          |              |
|---------------|----------|-----------|-----------|-----------|----------|--------------|
| Excited State | 2:       | Singlet-A | 3.2666 eV | 379.56 nm | f=0.0000 | <S**2>=0.000 |
|               | 66 -> 68 | 0.69984   |           |           |          |              |
| Excited State | 3:       | Singlet-A | 3.9432 eV | 314.42 nm | f=0.0000 | <S**2>=0.000 |
|               | 64 -> 68 | 0.33270   |           |           |          |              |
|               | 65 -> 68 | 0.61562   |           |           |          |              |
| Excited State | 4:       | Singlet-A | 3.9936 eV | 310.46 nm | f=0.0001 | <S**2>=0.000 |
|               | 63 -> 68 | 0.15547   |           |           |          |              |
|               | 64 -> 68 | 0.60471   |           |           |          |              |
|               | 65 -> 68 | -0.31655  |           |           |          |              |
| Excited State | 5:       | Singlet-A | 4.0079 eV | 309.35 nm | f=0.0004 | <S**2>=0.000 |
|               | 63 -> 68 | 0.68075   |           |           |          |              |
|               | 64 -> 68 | -0.11507  |           |           |          |              |
|               | 65 -> 68 | 0.11478   |           |           |          |              |
| Excited State | 6:       | Singlet-A | 5.3413 eV | 232.12 nm | f=0.0015 | <S**2>=0.000 |
|               | 67 -> 69 | 0.69536   |           |           |          |              |
| Excited State | 7:       | Singlet-A | 5.4217 eV | 228.68 nm | f=0.0009 | <S**2>=0.000 |
|               | 66 -> 69 | 0.68342   |           |           |          |              |
| Excited State | 8:       | Singlet-A | 5.5641 eV | 222.83 nm | f=0.0000 | <S**2>=0.000 |
|               | 66 -> 69 | 0.11245   |           |           |          |              |
|               | 66 -> 71 | 0.11067   |           |           |          |              |
|               | 67 -> 70 | 0.48195   |           |           |          |              |
|               | 67 -> 71 | -0.46365  |           |           |          |              |
| Excited State | 9:       | Singlet-A | 5.6142 eV | 220.84 nm | f=0.0017 | <S**2>=0.000 |
|               | 66 -> 70 | -0.35440  |           |           |          |              |
|               | 66 -> 71 | 0.57620   |           |           |          |              |
| Excited State | 10:      | Singlet-A | 5.6729 eV | 218.56 nm | f=0.0044 | <S**2>=0.000 |
|               | 67 -> 70 | 0.49154   |           |           |          |              |
|               | 67 -> 71 | 0.49519   |           |           |          |              |
| Excited State | 11:      | Singlet-A | 5.7204 eV | 216.74 nm | f=0.0037 | <S**2>=0.000 |
|               | 66 -> 70 | 0.60130   |           |           |          |              |
|               | 66 -> 71 | 0.35710   |           |           |          |              |
| Excited State | 12:      | Singlet-A | 5.8596 eV | 211.59 nm | f=0.0012 | <S**2>=0.000 |
|               | 60 -> 68 | -0.14550  |           |           |          |              |
|               | 62 -> 68 | 0.33001   |           |           |          |              |
|               | 67 -> 71 | 0.12228   |           |           |          |              |

|                   |           |           |           |          |              |
|-------------------|-----------|-----------|-----------|----------|--------------|
| 67 -> 72          | 0.50802   |           |           |          |              |
| 67 -> 74          | -0.25606  |           |           |          |              |
| Excited State 13: | Singlet-A | 5.8974 eV | 210.24 nm | f=0.0004 | <S**2>=0.000 |
| 60 -> 68          | 0.16246   |           |           |          |              |
| 61 -> 68          | -0.39306  |           |           |          |              |
| 65 -> 69          | 0.21436   |           |           |          |              |
| 66 -> 71          | 0.10787   |           |           |          |              |
| 66 -> 72          | 0.40278   |           |           |          |              |
| 66 -> 74          | -0.26076  |           |           |          |              |
| Excited State 14: | Singlet-A | 5.9127 eV | 209.69 nm | f=0.0013 | <S**2>=0.000 |
| 60 -> 68          | -0.18456  |           |           |          |              |
| 61 -> 68          | -0.15236  |           |           |          |              |
| 62 -> 68          | 0.45814   |           |           |          |              |
| 67 -> 72          | -0.45307  |           |           |          |              |
| 67 -> 74          | -0.10061  |           |           |          |              |
| Excited State 15: | Singlet-A | 5.9515 eV | 208.32 nm | f=0.0006 | <S**2>=0.000 |
| 61 -> 68          | 0.27810   |           |           |          |              |
| 65 -> 69          | -0.34493  |           |           |          |              |
| 66 -> 72          | 0.53172   |           |           |          |              |
| Excited State 16: | Singlet-A | 5.9785 eV | 207.38 nm | f=0.0109 | <S**2>=0.000 |
| 60 -> 68          | -0.12515  |           |           |          |              |
| 61 -> 68          | 0.35069   |           |           |          |              |
| 65 -> 69          | 0.56243   |           |           |          |              |
| 66 -> 72          | 0.15628   |           |           |          |              |
| Excited State 17: | Singlet-A | 6.1213 eV | 202.54 nm | f=0.0115 | <S**2>=0.000 |
| 60 -> 68          | 0.58125   |           |           |          |              |
| 61 -> 68          | 0.17491   |           |           |          |              |
| 62 -> 68          | 0.32579   |           |           |          |              |
| Excited State 18: | Singlet-A | 6.1878 eV | 200.37 nm | f=0.0091 | <S**2>=0.000 |
| 62 -> 68          | 0.13959   |           |           |          |              |
| 63 -> 69          | -0.16109  |           |           |          |              |
| 64 -> 69          | -0.13456  |           |           |          |              |
| 65 -> 70          | -0.34880  |           |           |          |              |
| 65 -> 71          | 0.50585   |           |           |          |              |
| 67 -> 74          | 0.19753   |           |           |          |              |
| Excited State 19: | Singlet-A | 6.2062 eV | 199.78 nm | f=0.0067 | <S**2>=0.000 |
| 64 -> 69          | 0.67170   |           |           |          |              |
| Excited State 20: | Singlet-A | 6.2322 eV | 198.94 nm | f=0.0080 | <S**2>=0.000 |

|                   |           |           |           |          |              |
|-------------------|-----------|-----------|-----------|----------|--------------|
| 62 -> 68          | 0.14856   |           |           |          |              |
| 63 -> 69          | 0.59100   |           |           |          |              |
| 67 -> 74          | 0.30609   |           |           |          |              |
| Excited State 21: | Singlet-A | 6.2731 eV | 197.64 nm | f=0.0029 | <S**2>=0.000 |
| 60 -> 68          | -0.16787  |           |           |          |              |
| 63 -> 69          | -0.32089  |           |           |          |              |
| 65 -> 70          | 0.21819   |           |           |          |              |
| 65 -> 71          | -0.19742  |           |           |          |              |
| 67 -> 72          | 0.11473   |           |           |          |              |
| 67 -> 74          | 0.47900   |           |           |          |              |
| Excited State 22: | Singlet-A | 6.3131 eV | 196.39 nm | f=0.0040 | <S**2>=0.000 |
| 61 -> 68          | -0.22930  |           |           |          |              |
| 66 -> 72          | 0.15760   |           |           |          |              |
| 66 -> 74          | 0.60883   |           |           |          |              |
| Excited State 23: | Singlet-A | 6.3319 eV | 195.81 nm | f=0.0011 | <S**2>=0.000 |
| 65 -> 70          | 0.55296   |           |           |          |              |
| 65 -> 71          | 0.42135   |           |           |          |              |
| Excited State 24: | Singlet-A | 6.4257 eV | 192.95 nm | f=0.0046 | <S**2>=0.000 |
| 64 -> 70          | -0.40417  |           |           |          |              |
| 64 -> 71          | 0.53868   |           |           |          |              |
| 64 -> 74          | 0.11276   |           |           |          |              |
| Excited State 25: | Singlet-A | 6.4371 eV | 192.61 nm | f=0.0026 | <S**2>=0.000 |
| 63 -> 70          | -0.37960  |           |           |          |              |
| 63 -> 71          | 0.53395   |           |           |          |              |
| 63 -> 74          | 0.12150   |           |           |          |              |
| 67 -> 73          | -0.15212  |           |           |          |              |
| Excited State 26: | Singlet-A | 6.4514 eV | 192.18 nm | f=0.0021 | <S**2>=0.000 |
| 63 -> 71          | 0.11704   |           |           |          |              |
| 67 -> 73          | 0.68264   |           |           |          |              |
| Excited State 27: | Singlet-A | 6.5228 eV | 190.08 nm | f=0.0017 | <S**2>=0.000 |
| 65 -> 72          | 0.58259   |           |           |          |              |
| 65 -> 74          | -0.15561  |           |           |          |              |
| 66 -> 73          | -0.33223  |           |           |          |              |
| Excited State 28: | Singlet-A | 6.5386 eV | 189.62 nm | f=0.0007 | <S**2>=0.000 |
| 65 -> 72          | 0.33051   |           |           |          |              |
| 66 -> 73          | 0.61025   |           |           |          |              |
| Excited State 29: | Singlet-A | 6.5911 eV | 188.11 nm | f=0.0011 | <S**2>=0.000 |

64 -> 70 0.54542  
64 -> 71 0.42744  
64 -> 72 0.11364

Excited State 30: Singlet-A 6.6195 eV 187.30 nm f=0.0000 <S\*\*2>=0.000  
63 -> 70 0.55521  
63 -> 71 0.41605  
63 -> 72 0.11998

### [Cu(I)L(C<sub>6</sub>H<sub>7</sub>O<sub>6</sub>)]<sup>+</sup>

Excitation energies and oscillator strengths:

Excited State 1: Singlet-A 3.5941 eV 344.97 nm f=0.0097 <S\*\*2>=0.000  
107 ->109 0.26177  
108 ->109 0.62471

This state for optimization and/or second-order correction.

Total Energy, E(TD-HF/TD-DFT) = -2843.36149466

Copying the excited state density for this state as the 1-particle RhoCI density.

Excited State 2: Singlet-A 3.6998 eV 335.11 nm f=0.0008 <S\*\*2>=0.000  
107 ->109 0.62167  
108 ->109 -0.25788

Excited State 3: Singlet-A 4.0082 eV 309.33 nm f=0.0024 <S\*\*2>=0.000  
107 ->110 0.67937  
108 ->110 0.11815

Excited State 4: Singlet-A 4.0436 eV 306.62 nm f=0.0020 <S\*\*2>=0.000  
106 ->109 0.64736  
108 ->110 -0.16534

Excited State 5: Singlet-A 4.0839 eV 303.59 nm f=0.0520 <S\*\*2>=0.000  
106 ->109 0.12123  
106 ->110 0.19987  
107 ->110 -0.11587  
108 ->109 -0.11226  
108 ->110 0.62745

Excited State 6: Singlet-A 4.3205 eV 286.97 nm f=0.0016 <S\*\*2>=0.000  
106 ->111 0.10242  
108 ->109 -0.10207  
108 ->111 0.66973  
108 ->112 -0.13798

Excited State 7: Singlet-A 4.3906 eV 282.38 nm f=0.0032 <S\*\*2>=0.000  
108 ->111 0.13755



|                   |           |           |           |          |              |
|-------------------|-----------|-----------|-----------|----------|--------------|
| 108 ->112         | 0.66537   |           |           |          |              |
| Excited State 8:  | Singlet-A | 4.4394 eV | 279.28 nm | f=0.0015 | <S**2>=0.000 |
| 107 ->109         | -0.10229  |           |           |          |              |
| 107 ->111         | 0.68660   |           |           |          |              |
| Excited State 9:  | Singlet-A | 4.5058 eV | 275.17 nm | f=0.0022 | <S**2>=0.000 |
| 104 ->109         | -0.10861  |           |           |          |              |
| 105 ->109         | 0.13773   |           |           |          |              |
| 107 ->112         | 0.65790   |           |           |          |              |
| Excited State 10: | Singlet-A | 4.5208 eV | 274.26 nm | f=0.0278 | <S**2>=0.000 |
| 104 ->109         | 0.10916   |           |           |          |              |
| 105 ->109         | 0.11498   |           |           |          |              |
| 106 ->110         | 0.63676   |           |           |          |              |
| 108 ->110         | -0.15170  |           |           |          |              |
| Excited State 11: | Singlet-A | 4.5378 eV | 273.23 nm | f=0.0025 | <S**2>=0.000 |
| 103 ->109         | 0.11218   |           |           |          |              |
| 104 ->109         | -0.28043  |           |           |          |              |
| 105 ->109         | 0.56396   |           |           |          |              |
| 107 ->112         | -0.18388  |           |           |          |              |
| Excited State 12: | Singlet-A | 4.6209 eV | 268.31 nm | f=0.0018 | <S**2>=0.000 |
| 103 ->109         | 0.53468   |           |           |          |              |
| 104 ->109         | 0.37734   |           |           |          |              |
| Excited State 13: | Singlet-A | 4.6648 eV | 265.79 nm | f=0.0030 | <S**2>=0.000 |
| 103 ->109         | -0.16028  |           |           |          |              |
| 108 ->114         | 0.65100   |           |           |          |              |
| Excited State 14: | Singlet-A | 4.7937 eV | 258.64 nm | f=0.0075 | <S**2>=0.000 |
| 103 ->109         | -0.27279  |           |           |          |              |
| 104 ->109         | 0.31824   |           |           |          |              |
| 105 ->109         | 0.22594   |           |           |          |              |
| 106 ->111         | 0.16089   |           |           |          |              |
| 106 ->112         | -0.27718  |           |           |          |              |
| 108 ->113         | -0.28768  |           |           |          |              |
| 108 ->115         | 0.17105   |           |           |          |              |
| Excited State 15: | Singlet-A | 4.8110 eV | 257.71 nm | f=0.0009 | <S**2>=0.000 |
| 106 ->111         | 0.47115   |           |           |          |              |
| 107 ->114         | 0.35927   |           |           |          |              |
| 108 ->113         | 0.31589   |           |           |          |              |
| Excited State 16: | Singlet-A | 4.8171 eV | 257.38 nm | f=0.0016 | <S**2>=0.000 |

|                   |           |           |           |          |              |
|-------------------|-----------|-----------|-----------|----------|--------------|
| 106 ->111         | -0.38330  |           |           |          |              |
| 107 ->114         | 0.54001   |           |           |          |              |
| Excited State 17: | Singlet-A | 4.8295 eV | 256.72 nm | f=0.0023 | <S**2>=0.000 |
| 103 ->109         | -0.11865  |           |           |          |              |
| 104 ->109         | 0.13715   |           |           |          |              |
| 106 ->111         | -0.26033  |           |           |          |              |
| 106 ->112         | -0.15748  |           |           |          |              |
| 108 ->113         | 0.53437   |           |           |          |              |
| 108 ->114         | -0.16062  |           |           |          |              |
| 108 ->115         | 0.11626   |           |           |          |              |
| Excited State 18: | Singlet-A | 4.8881 eV | 253.64 nm | f=0.0022 | <S**2>=0.000 |
| 102 ->110         | -0.13781  |           |           |          |              |
| 103 ->109         | -0.11866  |           |           |          |              |
| 104 ->109         | 0.13766   |           |           |          |              |
| 104 ->110         | 0.18417   |           |           |          |              |
| 105 ->109         | 0.16379   |           |           |          |              |
| 105 ->110         | -0.31947  |           |           |          |              |
| 106 ->112         | 0.48423   |           |           |          |              |
| Excited State 19: | Singlet-A | 4.9129 eV | 252.36 nm | f=0.0020 | <S**2>=0.000 |
| 102 ->110         | 0.18204   |           |           |          |              |
| 104 ->109         | 0.13585   |           |           |          |              |
| 104 ->110         | -0.25868  |           |           |          |              |
| 105 ->110         | 0.42906   |           |           |          |              |
| 106 ->112         | 0.33190   |           |           |          |              |
| 108 ->115         | 0.21941   |           |           |          |              |
| Excited State 20: | Singlet-A | 4.9614 eV | 249.90 nm | f=0.0045 | <S**2>=0.000 |
| 103 ->109         | 0.10035   |           |           |          |              |
| 104 ->109         | -0.17235  |           |           |          |              |
| 105 ->109         | -0.12573  |           |           |          |              |
| 105 ->110         | -0.14568  |           |           |          |              |
| 106 ->115         | 0.10135   |           |           |          |              |
| 108 ->115         | 0.59798   |           |           |          |              |
| Excited State 21: | Singlet-A | 5.0582 eV | 245.11 nm | f=0.0014 | <S**2>=0.000 |
| 103 ->110         | 0.40971   |           |           |          |              |
| 104 ->110         | 0.37223   |           |           |          |              |
| 105 ->110         | 0.23214   |           |           |          |              |
| 107 ->115         | -0.32671  |           |           |          |              |
| Excited State 22: | Singlet-A | 5.0736 eV | 244.37 nm | f=0.0026 | <S**2>=0.000 |
| 103 ->110         | 0.25433   |           |           |          |              |
| 104 ->110         | 0.21977   |           |           |          |              |

|                   |           |           |           |          |              |
|-------------------|-----------|-----------|-----------|----------|--------------|
| 107 ->114         | -0.14423  |           |           |          |              |
| 107 ->115         | 0.56034   |           |           |          |              |
| Excited State 23: | Singlet-A | 5.1649 eV | 240.05 nm | f=0.0001 | <S**2>=0.000 |
| 107 ->113         | 0.68643   |           |           |          |              |
| Excited State 24: | Singlet-A | 5.1764 eV | 239.52 nm | f=0.0041 | <S**2>=0.000 |
| 103 ->110         | 0.21197   |           |           |          |              |
| 104 ->110         | -0.16147  |           |           |          |              |
| 106 ->114         | 0.56748   |           |           |          |              |
| 106 ->115         | 0.10326   |           |           |          |              |
| Excited State 25: | Singlet-A | 5.2210 eV | 237.47 nm | f=0.0032 | <S**2>=0.000 |
| 100 ->110         | -0.10205  |           |           |          |              |
| 102 ->109         | -0.19477  |           |           |          |              |
| 102 ->110         | 0.49233   |           |           |          |              |
| 103 ->110         | -0.19244  |           |           |          |              |
| 104 ->110         | 0.30348   |           |           |          |              |
| 106 ->114         | 0.19541   |           |           |          |              |
| Excited State 26: | Singlet-A | 5.2654 eV | 235.47 nm | f=0.0381 | <S**2>=0.000 |
| 102 ->110         | 0.31138   |           |           |          |              |
| 103 ->110         | 0.39482   |           |           |          |              |
| 104 ->110         | -0.21714  |           |           |          |              |
| 105 ->110         | -0.30499  |           |           |          |              |
| 106 ->114         | -0.17033  |           |           |          |              |
| 108 ->118         | -0.10579  |           |           |          |              |
| Excited State 27: | Singlet-A | 5.3508 eV | 231.71 nm | f=0.0005 | <S**2>=0.000 |
| 104 ->111         | -0.24353  |           |           |          |              |
| 105 ->109         | -0.11246  |           |           |          |              |
| 105 ->111         | 0.62818   |           |           |          |              |
| Excited State 28: | Singlet-A | 5.3770 eV | 230.58 nm | f=0.0047 | <S**2>=0.000 |
| 104 ->111         | -0.23112  |           |           |          |              |
| 105 ->112         | 0.22400   |           |           |          |              |
| 106 ->114         | -0.19066  |           |           |          |              |
| 106 ->115         | 0.37895   |           |           |          |              |
| 108 ->118         | 0.38538   |           |           |          |              |
| Excited State 29: | Singlet-A | 5.4155 eV | 228.95 nm | f=0.0010 | <S**2>=0.000 |
| 103 ->111         | 0.36841   |           |           |          |              |
| 104 ->111         | 0.50908   |           |           |          |              |
| 105 ->111         | 0.17975   |           |           |          |              |
| 106 ->115         | 0.17259   |           |           |          |              |

Excited State 30: Singlet-A 5.4212 eV 228.70 nm f=0.0032 <S\*\*2>=0.000  
104 ->112 -0.36107  
105 ->112 0.51319  
106 ->115 -0.23077

### [Cu(I)LDHA]<sup>+</sup>

Excitation energies and oscillator strengths:

Excited State 1: Singlet-A 0.7816 eV 1586.26 nm f=0.0017 <S\*\*2>=0.000  
106 ->108 0.47647  
107 ->108 0.51538

This state for optimization and/or second-order correction.

Total Energy, E(TD-HF/TD-DFT) = -2842.73322556

Copying the excited state density for this state as the 1-particle RhoCI density.

Excited State 2: Singlet-A 1.4963 eV 828.59 nm f=0.0072 <S\*\*2>=0.000  
104 ->108 0.12193  
105 ->108 0.66017  
106 ->108 -0.13376  
107 ->108 0.14141

Excited State 3: Singlet-A 1.8059 eV 686.54 nm f=0.1494 <S\*\*2>=0.000  
101 ->108 -0.11422  
102 ->108 0.14475  
103 ->108 0.21182  
105 ->108 0.18543  
106 ->108 0.47488  
107 ->108 -0.43450  
106 <-108 -0.13374  
107 <-108 0.13786

Excited State 4: Singlet-A 2.1011 eV 590.09 nm f=0.0034 <S\*\*2>=0.000  
100 ->108 0.29916  
101 ->108 0.37952  
103 ->108 0.46886  
104 ->108 -0.15865

Excited State 5: Singlet-A 2.1876 eV 566.75 nm f=0.0617 <S\*\*2>=0.000  
100 ->108 0.29112  
101 ->108 0.36776  
102 ->108 -0.14983  
103 ->108 -0.35448  
104 ->108 0.22134  
106 ->108 0.19261  
107 ->108 -0.21018

|                   |           |           |           |          |              |
|-------------------|-----------|-----------|-----------|----------|--------------|
| Excited State 6:  | Singlet-A | 2.2147 eV | 559.82 nm | f=0.0013 | <S**2>=0.000 |
| 99 ->108          | -0.14126  |           |           |          |              |
| 100 ->108         | 0.16563   |           |           |          |              |
| 102 ->108         | 0.52354   |           |           |          |              |
| 104 ->108         | 0.37492   |           |           |          |              |
| 105 ->108         | -0.13893  |           |           |          |              |
| Excited State 7:  | Singlet-A | 2.8357 eV | 437.22 nm | f=0.0003 | <S**2>=0.000 |
| 100 ->108         | -0.12031  |           |           |          |              |
| 102 ->108         | -0.33911  |           |           |          |              |
| 103 ->108         | 0.32284   |           |           |          |              |
| 104 ->108         | 0.50933   |           |           |          |              |
| Excited State 8:  | Singlet-A | 3.0803 eV | 402.51 nm | f=0.0074 | <S**2>=0.000 |
| 98 ->108          | -0.28772  |           |           |          |              |
| 99 ->108          | 0.59264   |           |           |          |              |
| 100 ->108         | -0.13733  |           |           |          |              |
| 102 ->108         | 0.17007   |           |           |          |              |
| Excited State 9:  | Singlet-A | 3.1176 eV | 397.69 nm | f=0.0021 | <S**2>=0.000 |
| 99 ->108          | 0.17296   |           |           |          |              |
| 100 ->108         | 0.49842   |           |           |          |              |
| 101 ->108         | -0.43256  |           |           |          |              |
| 102 ->108         | -0.14558  |           |           |          |              |
| Excited State 10: | Singlet-A | 3.3760 eV | 367.25 nm | f=0.0222 | <S**2>=0.000 |
| 98 ->108          | 0.63208   |           |           |          |              |
| 99 ->108          | 0.28842   |           |           |          |              |
| Excited State 11: | Singlet-A | 3.6187 eV | 342.62 nm | f=0.0010 | <S**2>=0.000 |
| 95 ->108          | 0.60633   |           |           |          |              |
| 96 ->108          | -0.29070  |           |           |          |              |
| 97 ->108          | 0.13613   |           |           |          |              |
| Excited State 12: | Singlet-A | 3.8988 eV | 318.00 nm | f=0.0054 | <S**2>=0.000 |
| 95 ->108          | 0.30997   |           |           |          |              |
| 96 ->108          | 0.62378   |           |           |          |              |
| Excited State 13: | Singlet-A | 4.1363 eV | 299.75 nm | f=0.0202 | <S**2>=0.000 |
| 96 ->108          | 0.12861   |           |           |          |              |
| 97 ->108          | 0.66281   |           |           |          |              |
| Excited State 14: | Singlet-A | 4.4343 eV | 279.60 nm | f=0.0087 | <S**2>=0.000 |
| 106 ->109         | 0.30160   |           |           |          |              |
| 107 ->109         | 0.62688   |           |           |          |              |

|                   |           |           |           |          |              |
|-------------------|-----------|-----------|-----------|----------|--------------|
| Excited State 15: | Singlet-A | 4.5603 eV | 271.87 nm | f=0.0576 | <S**2>=0.000 |
| 106 ->109         | 0.62288   |           |           |          |              |
| 107 ->109         | -0.30226  |           |           |          |              |
| Excited State 16: | Singlet-A | 4.7642 eV | 260.24 nm | f=0.0045 | <S**2>=0.000 |
| 85 ->108          | -0.23019  |           |           |          |              |
| 93 ->108          | 0.53265   |           |           |          |              |
| 94 ->108          | 0.36455   |           |           |          |              |
| Excited State 17: | Singlet-A | 4.7810 eV | 259.33 nm | f=0.0002 | <S**2>=0.000 |
| 93 ->108          | -0.42377  |           |           |          |              |
| 94 ->108          | 0.55876   |           |           |          |              |
| Excited State 18: | Singlet-A | 4.8164 eV | 257.42 nm | f=0.0040 | <S**2>=0.000 |
| 92 ->108          | 0.69936   |           |           |          |              |
| Excited State 19: | Singlet-A | 4.8584 eV | 255.20 nm | f=0.0026 | <S**2>=0.000 |
| 85 ->108          | 0.51974   |           |           |          |              |
| 86 ->108          | 0.14524   |           |           |          |              |
| 89 ->108          | -0.15673  |           |           |          |              |
| 91 ->108          | 0.12653   |           |           |          |              |
| 93 ->108          | 0.17540   |           |           |          |              |
| 94 ->108          | 0.21788   |           |           |          |              |
| 105 ->109         | -0.19030  |           |           |          |              |
| Excited State 20: | Singlet-A | 5.0881 eV | 243.67 nm | f=0.0011 | <S**2>=0.000 |
| 90 ->108          | -0.43466  |           |           |          |              |
| 91 ->108          | 0.19085   |           |           |          |              |
| 102 ->109         | -0.11189  |           |           |          |              |
| 105 ->109         | 0.46805   |           |           |          |              |
| Excited State 21: | Singlet-A | 5.1083 eV | 242.71 nm | f=0.0012 | <S**2>=0.000 |
| 85 ->108          | 0.13834   |           |           |          |              |
| 90 ->108          | 0.54667   |           |           |          |              |
| 91 ->108          | 0.18041   |           |           |          |              |
| 105 ->109         | 0.34444   |           |           |          |              |
| Excited State 22: | Singlet-A | 5.1588 eV | 240.34 nm | f=0.0010 | <S**2>=0.000 |
| 85 ->108          | -0.17587  |           |           |          |              |
| 91 ->108          | 0.63904   |           |           |          |              |
| 105 ->109         | -0.19540  |           |           |          |              |
| Excited State 23: | Singlet-A | 5.4023 eV | 229.50 nm | f=0.0019 | <S**2>=0.000 |
| 86 ->108          | 0.17444   |           |           |          |              |
| 88 ->108          | 0.60669   |           |           |          |              |
| 89 ->108          | 0.29721   |           |           |          |              |

Excited State 24: Singlet-A 5.4127 eV 229.06 nm f=0.0037 <S\*\*2>=0.000  
89 ->108 0.11707  
106 ->110 0.15275  
107 ->110 0.66438

Excited State 25: Singlet-A 5.4331 eV 228.20 nm f=0.0037 <S\*\*2>=0.000  
85 ->108 0.18850  
88 ->108 -0.29638  
89 ->108 0.59348  
107 ->110 -0.10018

Excited State 26: Singlet-A 5.4511 eV 227.45 nm f=0.0043 <S\*\*2>=0.000  
86 ->108 -0.17721  
87 ->108 0.66732  
88 ->108 0.12062

Excited State 27: Singlet-A 5.5172 eV 224.72 nm f=0.0011 <S\*\*2>=0.000  
106 ->110 0.66845  
107 ->110 -0.16794

Excited State 28: Singlet-A 5.5375 eV 223.90 nm f=0.0006 <S\*\*2>=0.000  
85 ->108 -0.18011  
86 ->108 0.63090  
87 ->108 0.20784  
88 ->108 -0.15046

Excited State 29: Singlet-A 5.8102 eV 213.39 nm f=0.0003 <S\*\*2>=0.000  
100 ->109 0.14885  
102 ->109 0.30204  
103 ->109 -0.16060  
104 ->109 0.52665  
105 ->109 0.23452

Excited State 30: Singlet-A 5.9584 eV 208.08 nm f=0.0027 <S\*\*2>=0.000  
100 ->109 -0.10947  
102 ->109 -0.32993  
103 ->109 0.43766  
104 ->109 0.40855

M06 method:

Excitation energies and oscillator strengths:

Excited State 1: Singlet-A 0.8774 eV 1413.15 nm f=0.0018 <S\*\*2>=0.000  
98 ->108 0.11947  
106 ->108 0.53180

107 ->108 0.44791

This state for optimization and/or second-order correction.

Total Energy, E(TD-HF/TD-DFT) = -2841.90336117

Copying the excited state density for this state as the 1-particle RhoCI density.

Excited State 2: Singlet-A 1.5459 eV 802.04 nm f=0.0114 <S\*\*2>=0.000  
105 ->108 0.65800  
106 ->108 -0.12905  
107 ->108 0.18656

Excited State 3: Singlet-A 1.8032 eV 687.59 nm f=0.1491 <S\*\*2>=0.000  
102 ->108 -0.15848  
103 ->108 -0.11922  
105 ->108 -0.21948  
106 ->108 -0.42925  
107 ->108 0.49647  
107 <-108 -0.13318

Excited State 4: Singlet-A 2.1687 eV 571.70 nm f=0.0010 <S\*\*2>=0.000  
100 ->108 -0.17334  
101 ->108 0.49765  
102 ->108 -0.14056  
103 ->108 0.44026

Excited State 5: Singlet-A 2.2483 eV 551.45 nm f=0.0406 <S\*\*2>=0.000  
101 ->108 -0.23296  
102 ->108 0.40445  
103 ->108 0.44038  
104 ->108 -0.17414  
106 ->108 -0.12617  
107 ->108 0.18006

Excited State 6: Singlet-A 2.2921 eV 540.93 nm f=0.0005 <S\*\*2>=0.000  
99 ->108 -0.36818  
101 ->108 0.17743  
102 ->108 0.37444  
104 ->108 0.40256

Excited State 7: Singlet-A 3.0918 eV 401.00 nm f=0.0008 <S\*\*2>=0.000  
101 ->108 -0.30684  
102 ->108 -0.25767  
103 ->108 0.26518  
104 ->108 0.50544

Excited State 8: Singlet-A 3.1589 eV 392.49 nm f=0.0063 <S\*\*2>=0.000  
98 ->108 0.30239



|                   |           |           |                                 |
|-------------------|-----------|-----------|---------------------------------|
| 99 ->108          | 0.49016   |           |                                 |
| 100 ->108         | -0.21458  |           |                                 |
| 102 ->108         | 0.24381   |           |                                 |
| 103 ->108         | -0.10325  |           |                                 |
| 104 ->108         | 0.17348   |           |                                 |
| Excited State 9:  | Singlet-A | 3.3598 eV | 369.02 nm f=0.0059 <S**2>=0.000 |
| 95 ->108          | -0.10538  |           |                                 |
| 98 ->108          | 0.24416   |           |                                 |
| 100 ->108         | 0.60600   |           |                                 |
| 101 ->108         | 0.21338   |           |                                 |
| Excited State 10: | Singlet-A | 3.4159 eV | 362.96 nm f=0.0129 <S**2>=0.000 |
| 98 ->108          | 0.56477   |           |                                 |
| 99 ->108          | -0.32708  |           |                                 |
| 100 ->108         | -0.16105  |           |                                 |
| 102 ->108         | -0.12879  |           |                                 |
| Excited State 11: | Singlet-A | 3.7936 eV | 326.82 nm f=0.0009 <S**2>=0.000 |
| 95 ->108          | 0.59227   |           |                                 |
| 96 ->108          | -0.24516  |           |                                 |
| 97 ->108          | 0.14327   |           |                                 |
| 100 ->108         | 0.11722   |           |                                 |
| Excited State 12: | Singlet-A | 4.1061 eV | 301.95 nm f=0.0207 <S**2>=0.000 |
| 95 ->108          | -0.14656  |           |                                 |
| 97 ->108          | 0.66815   |           |                                 |
| Excited State 13: | Singlet-A | 4.1533 eV | 298.52 nm f=0.0068 <S**2>=0.000 |
| 95 ->108          | 0.24793   |           |                                 |
| 96 ->108          | 0.65140   |           |                                 |
| Excited State 14: | Singlet-A | 4.6655 eV | 265.75 nm f=0.0299 <S**2>=0.000 |
| 85 ->108          | 0.10228   |           |                                 |
| 107 ->109         | 0.68018   |           |                                 |
| Excited State 15: | Singlet-A | 4.7468 eV | 261.19 nm f=0.0286 <S**2>=0.000 |
| 85 ->108          | 0.11844   |           |                                 |
| 106 ->109         | 0.66199   |           |                                 |
| 107 ->109         | -0.12004  |           |                                 |
| Excited State 16: | Singlet-A | 4.7557 eV | 260.71 nm f=0.0022 <S**2>=0.000 |
| 93 ->108          | 0.68343   |           |                                 |
| Excited State 17: | Singlet-A | 4.7725 eV | 259.79 nm f=0.0003 <S**2>=0.000 |
| 94 ->108          | 0.69247   |           |                                 |

|                   |           |           |           |          |              |
|-------------------|-----------|-----------|-----------|----------|--------------|
| Excited State 18: | Singlet-A | 4.9484 eV | 250.55 nm | f=0.0024 | <S**2>=0.000 |
| 82 ->108          | 0.15800   |           |           |          |              |
| 83 ->108          | -0.12075  |           |           |          |              |
| 85 ->108          | 0.54939   |           |           |          |              |
| 92 ->108          | -0.10988  |           |           |          |              |
| 105 ->109         | -0.13857  |           |           |          |              |
| 106 ->109         | -0.18311  |           |           |          |              |
| Excited State 19: | Singlet-A | 5.0820 eV | 243.97 nm | f=0.0012 | <S**2>=0.000 |
| 92 ->108          | 0.68721   |           |           |          |              |
| Excited State 20: | Singlet-A | 5.1013 eV | 243.04 nm | f=0.0049 | <S**2>=0.000 |
| 91 ->108          | 0.69462   |           |           |          |              |
| Excited State 21: | Singlet-A | 5.2093 eV | 238.00 nm | f=0.0044 | <S**2>=0.000 |
| 106 ->110         | 0.13148   |           |           |          |              |
| 107 ->110         | 0.67091   |           |           |          |              |
| Excited State 22: | Singlet-A | 5.3006 eV | 233.91 nm | f=0.0006 | <S**2>=0.000 |
| 85 ->108          | 0.11621   |           |           |          |              |
| 99 ->109          | 0.17276   |           |           |          |              |
| 104 ->109         | -0.10176  |           |           |          |              |
| 105 ->109         | 0.44039   |           |           |          |              |
| 106 ->110         | -0.43367  |           |           |          |              |
| Excited State 23: | Singlet-A | 5.3140 eV | 233.32 nm | f=0.0009 | <S**2>=0.000 |
| 85 ->108          | 0.11463   |           |           |          |              |
| 99 ->109          | 0.13739   |           |           |          |              |
| 105 ->109         | 0.35132   |           |           |          |              |
| 106 ->110         | 0.51409   |           |           |          |              |
| 107 ->110         | -0.14325  |           |           |          |              |
| Excited State 24: | Singlet-A | 5.3981 eV | 229.68 nm | f=0.0011 | <S**2>=0.000 |
| 86 ->108          | -0.32198  |           |           |          |              |
| 87 ->108          | -0.10901  |           |           |          |              |
| 88 ->108          | 0.54717   |           |           |          |              |
| 89 ->108          | 0.22199   |           |           |          |              |
| 90 ->108          | -0.14786  |           |           |          |              |
| Excited State 25: | Singlet-A | 5.4311 eV | 228.29 nm | f=0.0029 | <S**2>=0.000 |
| 86 ->108          | 0.10240   |           |           |          |              |
| 89 ->108          | 0.42222   |           |           |          |              |
| 90 ->108          | 0.54679   |           |           |          |              |
| Excited State 26: | Singlet-A | 5.4484 eV | 227.56 nm | f=0.0041 | <S**2>=0.000 |

86 ->108 0.28285  
87 ->108 0.58543  
88 ->108 0.22520  
90 ->108 -0.13213

Excited State 27: Singlet-A 5.4564 eV 227.23 nm f=0.0011 <S\*\*2>=0.000

85 ->108 0.13597  
88 ->108 -0.29275  
89 ->108 0.49153  
90 ->108 -0.36066

Excited State 28: Singlet-A 5.5232 eV 224.48 nm f=0.0006 <S\*\*2>=0.000

86 ->108 0.53862  
87 ->108 -0.36768  
88 ->108 0.23714

Excited State 29: Singlet-A 6.0499 eV 204.94 nm f=0.0003 <S\*\*2>=0.000

77 ->108 0.15929  
99 ->109 -0.24536  
101 ->109 0.23993  
102 ->109 0.17684  
104 ->109 0.43917  
105 ->109 0.31696

Excited State 30: Singlet-A 6.1211 eV 202.55 nm f=0.0010 <S\*\*2>=0.000

83 ->108 0.23743  
84 ->108 0.65670

### [Cu(II)L]<sup>2+</sup>

Excitation energies and oscillator strengths:

Excited State 1: 2.003-A 0.1803 eV 6874.70 nm f=0.0005 <S\*\*2>=0.753

52B -> 62B -0.20922  
56B -> 62B -0.11044  
61B -> 62B 0.96758  
61B <- 62B -0.15981

This state for optimization and/or second-order correction.

Total Energy, E(TD-HF/TD-DFT) = -2159.20092213

Copying the excited state density for this state as the 1-particle RhoCl density.

Excited State 2: 2.005-A 1.9122 eV 648.38 nm f=0.0011 <S\*\*2>=0.755

45B -> 62B -0.10634  
51B -> 62B -0.12445  
53B -> 62B 0.14232  
55B -> 62B 0.92407  
57B -> 62B 0.16497

|                  |          |           |                                 |
|------------------|----------|-----------|---------------------------------|
| 58B -> 62B       | 0.13027  |           |                                 |
| 59B -> 62B       | -0.10999 |           |                                 |
| 60B -> 62B       | 0.11186  |           |                                 |
| Excited State 3: | 2.004-A  | 1.9396 eV | 639.23 nm f=0.0011 <S**2>=0.754 |
| 48B -> 62B       | -0.15099 |           |                                 |
| 49B -> 62B       | -0.11071 |           |                                 |
| 51B -> 62B       | 0.16563  |           |                                 |
| 53B -> 62B       | -0.11568 |           |                                 |
| 54B -> 62B       | 0.91806  |           |                                 |
| 56B -> 62B       | -0.11247 |           |                                 |
| 58B -> 62B       | 0.11491  |           |                                 |
| 60B -> 62B       | 0.13200  |           |                                 |
| Excited State 4: | 2.004-A  | 2.1276 eV | 582.74 nm f=0.0019 <S**2>=0.754 |
| 48B -> 62B       | 0.91122  |           |                                 |
| 52B -> 62B       | 0.22553  |           |                                 |
| 54B -> 62B       | 0.17101  |           |                                 |
| 56B -> 62B       | -0.11801 |           |                                 |
| 60B -> 62B       | -0.12648 |           |                                 |
| Excited State 5: | 2.007-A  | 2.3412 eV | 529.57 nm f=0.0263 <S**2>=0.757 |
| 48B -> 62B       | 0.11244  |           |                                 |
| 51B -> 62B       | 0.15704  |           |                                 |
| 52B -> 62B       | 0.29275  |           |                                 |
| 54B -> 62B       | -0.13865 |           |                                 |
| 55B -> 62B       | -0.10463 |           |                                 |
| 56B -> 62B       | 0.15656  |           |                                 |
| 58B -> 62B       | 0.10630  |           |                                 |
| 60B -> 62B       | 0.86429  |           |                                 |
| 61B -> 62B       | 0.18532  |           |                                 |
| Excited State 6: | 2.007-A  | 2.9141 eV | 425.46 nm f=0.0626 <S**2>=0.757 |
| 48B -> 62B       | -0.13377 |           |                                 |
| 50B -> 62B       | 0.14694  |           |                                 |
| 51B -> 62B       | 0.27085  |           |                                 |
| 52B -> 62B       | 0.59007  |           |                                 |
| 53B -> 62B       | 0.20396  |           |                                 |
| 56B -> 62B       | 0.34871  |           |                                 |
| 58B -> 62B       | 0.32324  |           |                                 |
| 60B -> 62B       | -0.43442 |           |                                 |
| 61B -> 62B       | 0.22878  |           |                                 |
| Excited State 7: | 3.450-A  | 3.2680 eV | 379.39 nm f=0.0004 <S**2>=2.725 |
| 62A -> 63A       | -0.62995 |           |                                 |
| 61B -> 63B       | 0.75695  |           |                                 |

Excited State 8: 2.011-A 3.5718 eV 347.12 nm f=0.0214 <S\*\*2>=0.761  
60A -> 63A -0.10368  
62A -> 63A -0.25570  
57B -> 62B 0.15628  
59B -> 62B 0.90810  
61B -> 63B -0.19032

Excited State 9: 2.008-A 3.6045 eV 343.97 nm f=0.0030 <S\*\*2>=0.758  
48B -> 62B 0.14168  
51B -> 62B -0.11644  
52B -> 62B -0.31520  
57B -> 62B -0.26344  
58B -> 62B 0.87711

Excited State 10: 2.008-A 3.6222 eV 342.29 nm f=0.0025 <S\*\*2>=0.758  
62A -> 63A 0.10070  
53B -> 62B -0.17415  
55B -> 62B -0.16184  
56B -> 62B -0.10181  
57B -> 62B 0.91372  
58B -> 62B 0.22609  
59B -> 62B -0.11992

Excited State 11: 2.030-A 3.7829 eV 327.75 nm f=0.0077 <S\*\*2>=0.781  
62A -> 63A 0.70840  
59B -> 62B 0.31578  
61B -> 63B 0.59689

Excited State 12: 2.008-A 3.9531 eV 313.64 nm f=0.0008 <S\*\*2>=0.758  
52B -> 62B -0.13834  
53B -> 62B 0.87597  
55B -> 62B -0.14401  
56B -> 62B -0.39957

Excited State 13: 2.008-A 4.0663 eV 304.90 nm f=0.0108 <S\*\*2>=0.758  
48B -> 62B 0.15251  
52B -> 62B -0.43260  
53B -> 62B 0.26247  
54B -> 62B 0.21070  
55B -> 62B -0.13485  
56B -> 62B 0.78771  
57B -> 62B 0.11064

Excited State 14: 2.009-A 4.2028 eV 295.01 nm f=0.0069 <S\*\*2>=0.760  
61A -> 63A -0.14275

|                   |          |           |           |          |              |
|-------------------|----------|-----------|-----------|----------|--------------|
| 48B -> 62B        | 0.10691  |           |           |          |              |
| 51B -> 62B        | 0.88299  |           |           |          |              |
| 52B -> 62B        | -0.34418 |           |           |          |              |
| 54B -> 62B        | -0.13311 |           |           |          |              |
| 55B -> 62B        | 0.14933  |           |           |          |              |
| Excited State 15: | 2.063-A  | 4.3102 eV | 287.65 nm | f=0.0002 | <S**2>=0.814 |
| 61A -> 63A        | 0.91631  |           |           |          |              |
| 50B -> 62B        | -0.30336 |           |           |          |              |
| 51B -> 62B        | 0.16402  |           |           |          |              |
| Excited State 16: | 2.013-A  | 4.3917 eV | 282.31 nm | f=0.0147 | <S**2>=0.763 |
| 61A -> 63A        | 0.26886  |           |           |          |              |
| 49B -> 62B        | -0.40738 |           |           |          |              |
| 50B -> 62B        | 0.83449  |           |           |          |              |
| 52B -> 62B        | -0.10737 |           |           |          |              |
| 53B -> 62B        | -0.12116 |           |           |          |              |
| Excited State 17: | 2.011-A  | 4.4241 eV | 280.25 nm | f=0.0144 | <S**2>=0.761 |
| 61A -> 63A        | 0.18862  |           |           |          |              |
| 49B -> 62B        | 0.88937  |           |           |          |              |
| 50B -> 62B        | 0.37096  |           |           |          |              |
| Excited State 18: | 2.009-A  | 4.8896 eV | 253.57 nm | f=0.0016 | <S**2>=0.759 |
| 45B -> 62B        | 0.11861  |           |           |          |              |
| 46B -> 62B        | -0.22275 |           |           |          |              |
| 47B -> 62B        | 0.95065  |           |           |          |              |
| Excited State 19: | 2.009-A  | 5.0463 eV | 245.69 nm | f=0.0039 | <S**2>=0.759 |
| 44B -> 62B        | -0.20535 |           |           |          |              |
| 46B -> 62B        | 0.93931  |           |           |          |              |
| 47B -> 62B        | 0.21532  |           |           |          |              |
| Excited State 20: | 3.321-A  | 5.2638 eV | 235.54 nm | f=0.0045 | <S**2>=2.508 |
| 60A -> 63A        | -0.53217 |           |           |          |              |
| 45B -> 62B        | 0.27257  |           |           |          |              |
| 60B -> 63B        | 0.76509  |           |           |          |              |
| Excited State 21: | 2.138-A  | 5.2813 eV | 234.76 nm | f=0.0023 | <S**2>=0.893 |
| 44B -> 62B        | -0.25551 |           |           |          |              |
| 45B -> 62B        | 0.89083  |           |           |          |              |
| 47B -> 62B        | -0.12632 |           |           |          |              |
| 52B -> 62B        | -0.10675 |           |           |          |              |
| 60B -> 63B        | -0.26332 |           |           |          |              |
| Excited State 22: | 2.012-A  | 5.3976 eV | 229.70 nm | f=0.0123 | <S**2>=0.762 |

|                   |          |           |           |          |              |
|-------------------|----------|-----------|-----------|----------|--------------|
| 44B -> 62B        | 0.92639  |           |           |          |              |
| 45B -> 62B        | 0.27375  |           |           |          |              |
| 46B -> 62B        | 0.17882  |           |           |          |              |
| Excited State 23: | 2.010-A  | 5.5612 eV | 222.94 nm | f=0.0102 | <S**2>=0.760 |
| 43B -> 62B        | 0.98357  |           |           |          |              |
| Excited State 24: | 3.132-A  | 5.7668 eV | 214.99 nm | f=0.0024 | <S**2>=2.203 |
| 54A -> 63A        | -0.27489 |           |           |          |              |
| 55A -> 63A        | -0.10126 |           |           |          |              |
| 60A -> 63A        | -0.13132 |           |           |          |              |
| 54B -> 63B        | 0.17003  |           |           |          |              |
| 55B -> 63B        | 0.62278  |           |           |          |              |
| 58B -> 63B        | 0.17276  |           |           |          |              |
| 59B -> 63B        | -0.60900 |           |           |          |              |
| 60B -> 63B        | -0.15650 |           |           |          |              |
| Excited State 25: | 2.252-A  | 5.8006 eV | 213.74 nm | f=0.0364 | <S**2>=1.018 |
| 52A -> 63A        | -0.11485 |           |           |          |              |
| 60A -> 63A        | 0.68817  |           |           |          |              |
| 42B -> 62B        | -0.11245 |           |           |          |              |
| 54B -> 63B        | -0.26088 |           |           |          |              |
| 59B -> 62B        | 0.14305  |           |           |          |              |
| 59B -> 63B        | -0.29213 |           |           |          |              |
| 60B -> 63B        | 0.49065  |           |           |          |              |
| Excited State 26: | 3.141-A  | 5.8352 eV | 212.48 nm | f=0.0089 | <S**2>=2.216 |
| 51A -> 63A        | 0.10575  |           |           |          |              |
| 53A -> 63A        | 0.27081  |           |           |          |              |
| 54A -> 63A        | -0.26437 |           |           |          |              |
| 60A -> 63A        | 0.27931  |           |           |          |              |
| 54B -> 63B        | 0.51296  |           |           |          |              |
| 55B -> 63B        | 0.31848  |           |           |          |              |
| 59B -> 63B        | 0.57578  |           |           |          |              |
| 60B -> 63B        | 0.11686  |           |           |          |              |
| Excited State 27: | 3.295-A  | 5.8714 eV | 211.17 nm | f=0.0037 | <S**2>=2.464 |
| 52A -> 63A        | 0.20930  |           |           |          |              |
| 53A -> 63A        | 0.32081  |           |           |          |              |
| 54A -> 63A        | 0.11760  |           |           |          |              |
| 55A -> 63A        | 0.15672  |           |           |          |              |
| 51B -> 63B        | 0.16046  |           |           |          |              |
| 53B -> 63B        | -0.14992 |           |           |          |              |
| 54B -> 63B        | 0.54142  |           |           |          |              |
| 55B -> 63B        | -0.42188 |           |           |          |              |
| 56B -> 63B        | -0.18049 |           |           |          |              |

|                   |          |           |                                 |
|-------------------|----------|-----------|---------------------------------|
| 57B -> 63B        | -0.18706 |           |                                 |
| 59B -> 63B        | -0.38848 |           |                                 |
| Excited State 28: | 2.200-A  | 6.1372 eV | 202.02 nm f=0.0050 <S**2>=0.960 |
| 52A -> 63A        | 0.29730  |           |                                 |
| 54A -> 63A        | 0.67015  |           |                                 |
| 55A -> 63A        | 0.36727  |           |                                 |
| 56A -> 63A        | -0.10239 |           |                                 |
| 58A -> 63A        | 0.21355  |           |                                 |
| 59A -> 63A        | 0.11011  |           |                                 |
| 55B -> 63B        | 0.43138  |           |                                 |
| 57B -> 63B        | 0.11419  |           |                                 |
| Excited State 29: | 2.592-A  | 6.2033 eV | 199.87 nm f=0.0047 <S**2>=1.429 |
| 50A -> 63A        | -0.18627 |           |                                 |
| 51A -> 63A        | 0.17408  |           |                                 |
| 52A -> 63A        | 0.32907  |           |                                 |
| 53A -> 63A        | 0.46390  |           |                                 |
| 54A -> 63A        | -0.20569 |           |                                 |
| 55A -> 63A        | 0.11897  |           |                                 |
| 59A -> 63A        | -0.33927 |           |                                 |
| 52B -> 63B        | 0.25643  |           |                                 |
| 53B -> 63B        | 0.13497  |           |                                 |
| 54B -> 63B        | -0.42990 |           |                                 |
| 56B -> 63B        | 0.24110  |           |                                 |
| 58B -> 63B        | 0.15928  |           |                                 |
| Excited State 30: | 2.994-A  | 6.2227 eV | 199.25 nm f=0.0033 <S**2>=1.992 |
| 50A -> 63A        | 0.11245  |           |                                 |
| 51A -> 63A        | 0.14775  |           |                                 |
| 53A -> 63A        | 0.49972  |           |                                 |
| 54A -> 63A        | -0.10431 |           |                                 |
| 57A -> 63A        | 0.12692  |           |                                 |
| 59A -> 63A        | 0.11894  |           |                                 |
| 60A -> 63A        | -0.10374 |           |                                 |
| 42B -> 62B        | 0.23906  |           |                                 |
| 50B -> 63B        | -0.13054 |           |                                 |
| 51B -> 63B        | -0.21915 |           |                                 |
| 52B -> 63B        | -0.43311 |           |                                 |
| 53B -> 63B        | -0.12080 |           |                                 |
| 54B -> 63B        | -0.18475 |           |                                 |
| 56B -> 63B        | -0.24455 |           |                                 |
| 58B -> 63B        | -0.42864 |           |                                 |

**[Cu(II)L(H<sub>2</sub>O)]<sup>2+</sup>**

Excitation energies and oscillator strengths:



Excited State 1: 2.008-A 0.5645 eV 2196.26 nm f=0.0042 <S\*\*2>=0.758  
55B -> 67B 0.10170  
58B -> 67B 0.21313  
59B -> 67B 0.19350  
66B -> 67B 0.94580  
66B <- 67B -0.10174

This state for optimization and/or second-order correction.

Total Energy, E(TD-HF/TD-DFT) = -2235.61503936

Copying the excited state density for this state as the 1-particle RhoCI density.

Excited State 2: 2.003-A 2.0013 eV 619.53 nm f=0.0001 <S\*\*2>=0.753  
48B -> 67B -0.20780  
50B -> 67B -0.12082  
54B -> 67B -0.14627  
58B -> 67B -0.10474  
60B -> 67B 0.60730  
61B -> 67B -0.60079  
62B -> 67B -0.19084  
63B -> 67B 0.19827  
64B -> 67B 0.25189

Excited State 3: 2.003-A 2.0752 eV 597.46 nm f=0.0013 <S\*\*2>=0.753  
50B -> 67B -0.11633  
58B -> 67B -0.10783  
59B -> 67B -0.10952  
60B -> 67B 0.63050  
61B -> 67B 0.53468  
62B -> 67B 0.48306  
63B -> 67B -0.12004

Excited State 4: 2.003-A 2.1909 eV 565.91 nm f=0.0001 <S\*\*2>=0.753  
49B -> 67B -0.11507  
54B -> 67B 0.37595  
55B -> 67B -0.35971  
56B -> 67B 0.60556  
57B -> 67B 0.51271  
58B -> 67B 0.20745  
63B -> 67B 0.13809

Excited State 5: 2.011-A 2.8197 eV 439.70 nm f=0.0618 <S\*\*2>=0.761  
61B -> 67B -0.10920  
64B -> 67B -0.14948  
65B -> 67B 0.97175

Excited State 6: 2.027-A 3.0454 eV 407.11 nm f=0.0278 <S\*\*2>=0.777

|                   |          |           |           |          |              |
|-------------------|----------|-----------|-----------|----------|--------------|
| 54B -> 67B        | -0.17825 |           |           |          |              |
| 55B -> 67B        | 0.23227  |           |           |          |              |
| 57B -> 67B        | 0.10795  |           |           |          |              |
| 58B -> 67B        | 0.59670  |           |           |          |              |
| 59B -> 67B        | 0.55351  |           |           |          |              |
| 60B -> 67B        | 0.15029  |           |           |          |              |
| 63B -> 67B        | -0.25671 |           |           |          |              |
| 66B -> 67B        | -0.33278 |           |           |          |              |
| Excited State 7:  | 2.006-A  | 3.6960 eV | 335.46 nm | f=0.0373 | <S**2>=0.756 |
| 60B -> 67B        | -0.18603 |           |           |          |              |
| 61B -> 67B        | 0.13434  |           |           |          |              |
| 64B -> 67B        | 0.94142  |           |           |          |              |
| 65B -> 67B        | 0.16058  |           |           |          |              |
| Excited State 8:  | 2.014-A  | 4.0731 eV | 304.40 nm | f=0.0022 | <S**2>=0.765 |
| 55B -> 67B        | 0.10540  |           |           |          |              |
| 56B -> 67B        | -0.13414 |           |           |          |              |
| 58B -> 67B        | 0.16922  |           |           |          |              |
| 59B -> 67B        | 0.18194  |           |           |          |              |
| 61B -> 67B        | 0.12151  |           |           |          |              |
| 62B -> 67B        | 0.24734  |           |           |          |              |
| 63B -> 67B        | 0.90583  |           |           |          |              |
| Excited State 9:  | 2.013-A  | 4.1066 eV | 301.92 nm | f=0.0031 | <S**2>=0.763 |
| 60B -> 67B        | -0.20788 |           |           |          |              |
| 61B -> 67B        | -0.51579 |           |           |          |              |
| 62B -> 67B        | 0.81242  |           |           |          |              |
| 63B -> 67B        | -0.14520 |           |           |          |              |
| Excited State 10: | 2.013-A  | 4.4104 eV | 281.12 nm | f=0.0002 | <S**2>=0.763 |
| 54B -> 67B        | 0.13627  |           |           |          |              |
| 55B -> 67B        | -0.10240 |           |           |          |              |
| 58B -> 67B        | -0.62766 |           |           |          |              |
| 59B -> 67B        | 0.74801  |           |           |          |              |
| Excited State 11: | 2.026-A  | 4.6932 eV | 264.18 nm | f=0.0007 | <S**2>=0.776 |
| 54B -> 67B        | -0.13960 |           |           |          |              |
| 55B -> 67B        | 0.42351  |           |           |          |              |
| 56B -> 67B        | -0.26955 |           |           |          |              |
| 57B -> 67B        | 0.80045  |           |           |          |              |
| 58B -> 67B        | -0.20283 |           |           |          |              |
| 59B -> 67B        | -0.16807 |           |           |          |              |
| Excited State 12: | 2.080-A  | 4.7584 eV | 260.56 nm | f=0.0106 | <S**2>=0.831 |
| 54B -> 67B        | -0.57644 |           |           |          |              |

|                   |          |           |           |          |              |
|-------------------|----------|-----------|-----------|----------|--------------|
| 55B -> 67B        | 0.26879  |           |           |          |              |
| 56B -> 67B        | 0.66542  |           |           |          |              |
| 57B -> 67B        | -0.11248 |           |           |          |              |
| 58B -> 67B        | -0.21306 |           |           |          |              |
| 60B -> 67B        | -0.20366 |           |           |          |              |
| 66B -> 68B        | 0.17670  |           |           |          |              |
| Excited State 13: | 2.394-A  | 4.8013 eV | 258.23 nm | f=0.0128 | <S**2>=1.183 |
| 67A -> 68A        | 0.16797  |           |           |          |              |
| 53B -> 67B        | -0.12208 |           |           |          |              |
| 54B -> 67B        | 0.59178  |           |           |          |              |
| 55B -> 67B        | 0.53529  |           |           |          |              |
| 56B -> 67B        | 0.12628  |           |           |          |              |
| 57B -> 67B        | -0.20253 |           |           |          |              |
| 66B -> 68B        | 0.47076  |           |           |          |              |
| Excited State 14: | 2.895-A  | 4.8188 eV | 257.29 nm | f=0.0066 | <S**2>=1.846 |
| 67A -> 68A        | 0.25767  |           |           |          |              |
| 54B -> 67B        | -0.19985 |           |           |          |              |
| 55B -> 67B        | -0.47374 |           |           |          |              |
| 56B -> 67B        | -0.21884 |           |           |          |              |
| 66B -> 68B        | 0.76722  |           |           |          |              |
| Excited State 15: | 2.025-A  | 4.9364 eV | 251.17 nm | f=0.0014 | <S**2>=0.775 |
| 53B -> 67B        | 0.97947  |           |           |          |              |
| Excited State 16: | 2.307-A  | 5.1466 eV | 240.90 nm | f=0.0002 | <S**2>=1.081 |
| 67A -> 68A        | 0.93097  |           |           |          |              |
| 66B -> 68B        | -0.33155 |           |           |          |              |
| Excited State 17: | 2.156-A  | 5.2481 eV | 236.25 nm | f=0.0016 | <S**2>=0.912 |
| 66A -> 68A        | 0.97808  |           |           |          |              |
| Excited State 18: | 2.015-A  | 5.3772 eV | 230.58 nm | f=0.0024 | <S**2>=0.765 |
| 48B -> 67B        | 0.21475  |           |           |          |              |
| 50B -> 67B        | 0.27557  |           |           |          |              |
| 52B -> 67B        | 0.91541  |           |           |          |              |
| Excited State 19: | 2.015-A  | 5.4748 eV | 226.46 nm | f=0.0031 | <S**2>=0.765 |
| 47B -> 67B        | 0.11605  |           |           |          |              |
| 48B -> 67B        | -0.50059 |           |           |          |              |
| 50B -> 67B        | -0.26741 |           |           |          |              |
| 51B -> 67B        | 0.72379  |           |           |          |              |
| 52B -> 67B        | 0.27892  |           |           |          |              |
| 60B -> 67B        | -0.17811 |           |           |          |              |

Excited State 20: 2.015-A 5.5508 eV 223.36 nm f=0.0020 <S\*\*2>=0.765  
47B -> 67B -0.13334  
48B -> 67B 0.43683  
49B -> 67B 0.27701  
50B -> 67B 0.45710  
51B -> 67B 0.64555  
52B -> 67B -0.22886  
60B -> 67B 0.12323

Excited State 21: 2.015-A 5.8505 eV 211.92 nm f=0.0062 <S\*\*2>=0.765  
47B -> 67B 0.10769  
48B -> 67B -0.34490  
49B -> 67B -0.60412  
50B -> 67B 0.68488  
52B -> 67B -0.12294

Excited State 22: 2.016-A 5.8765 eV 210.98 nm f=0.0038 <S\*\*2>=0.766  
48B -> 67B -0.54571  
49B -> 67B 0.71159  
50B -> 67B 0.36497  
51B -> 67B -0.19859

Excited State 23: 2.015-A 6.0651 eV 204.42 nm f=0.0105 <S\*\*2>=0.765  
47B -> 67B 0.96466  
48B -> 67B 0.17354  
49B -> 67B 0.15183

Excited State 24: 3.221-A 6.5163 eV 190.27 nm f=0.0034 <S\*\*2>=2.344  
65A -> 68A -0.31791  
64B -> 68B 0.10046  
65B -> 68B 0.90628  
66B -> 70B 0.14669

Excited State 25: 2.056-A 6.7475 eV 183.75 nm f=0.0008 <S\*\*2>=0.806  
65A -> 68A -0.18844  
46B -> 67B 0.95354

Excited State 26: 2.230-A 6.7721 eV 183.08 nm f=0.0018 <S\*\*2>=0.994  
65A -> 68A -0.46029  
45B -> 67B 0.80147  
46B -> 67B -0.18286  
64B -> 68B -0.19781  
65B -> 68B -0.18792

Excited State 27: 2.496-A 6.8809 eV 180.19 nm f=0.0047 <S\*\*2>=1.308  
65A -> 68A 0.50994

44B -> 67B 0.48452  
45B -> 67B 0.49237  
64B -> 68B 0.42698  
65B -> 68B 0.13564

Excited State 28: 2.262-A 6.9135 eV 179.34 nm f=0.0029 <S\*\*2>=1.029  
65A -> 68A -0.28059  
44B -> 67B 0.82762  
45B -> 67B -0.24834  
46B -> 67B -0.13816  
61B -> 68B 0.12461  
64B -> 68B -0.22145  
66B -> 69B 0.19788

Excited State 29: 3.015-A 6.9545 eV 178.28 nm f=0.0009 <S\*\*2>=2.022  
67A -> 69A 0.12034  
44B -> 67B -0.16165  
58B -> 68B -0.11870  
66B -> 69B 0.91704

Excited State 30: 2.826-A 7.0232 eV 176.54 nm f=0.0193 <S\*\*2>=1.747  
61A -> 68A 0.18243  
62A -> 68A 0.21487  
65A -> 68A -0.43575  
45B -> 67B -0.15346  
61B -> 68B -0.36045  
62B -> 68B -0.20112  
63B -> 68B 0.13141  
64B -> 68B 0.57350  
65B -> 68B -0.25296  
66B -> 70B 0.19099

### [Cu(II)L(H<sub>2</sub>O)<sub>2</sub>]<sup>2+</sup>

Excitation energies and oscillator strengths:

Excited State 1: 2.003-A 0.6904 eV 1795.93 nm f=0.0012 <S\*\*2>=0.753  
61B -> 72B -0.12038  
64B -> 72B -0.23894  
66B -> 72B -0.22811  
71B -> 72B 0.91872

This state for optimization and/or second-order correction.

Total Energy, E(TD-HF/TD-DFT) = -2312.01230810

Copying the excited state density for this state as the 1-particle RhoCl density.

Excited State 2: 2.002-A 2.1200 eV 584.84 nm f=0.0006 <S\*\*2>=0.752  
52B -> 72B -0.14601

54B -> 72B -0.13936  
57B -> 72B 0.14078  
59B -> 72B 0.12191  
60B -> 72B -0.15642  
64B -> 72B 0.24184  
65B -> 72B 0.70117  
66B -> 72B -0.43080  
67B -> 72B -0.22575  
68B -> 72B -0.19197  
69B -> 72B 0.15596

Excited State 3: 2.002-A 2.1600 eV 574.00 nm f=0.0006 <S\*\*2>=0.752

62B -> 72B -0.13769  
63B -> 72B -0.10743  
64B -> 72B -0.48940  
65B -> 72B 0.52056  
66B -> 72B 0.62764  
67B -> 72B -0.11289  
69B -> 72B 0.10434

Excited State 4: 2.002-A 2.2583 eV 549.01 nm f=0.0006 <S\*\*2>=0.752

53B -> 72B -0.11504  
54B -> 72B 0.22226  
57B -> 72B 0.31058  
58B -> 72B 0.52322  
60B -> 72B 0.33957  
61B -> 72B 0.49639  
62B -> 72B -0.34173  
63B -> 72B -0.13392  
66B -> 72B -0.12724  
68B -> 72B -0.12499

Excited State 5: 2.005-A 2.8681 eV 432.28 nm f=0.0096 <S\*\*2>=0.755

61B -> 72B 0.15585  
62B -> 72B 0.12889  
64B -> 72B 0.42208  
65B -> 72B 0.12923  
66B -> 72B 0.35436  
68B -> 72B -0.17675  
70B -> 72B 0.67798  
71B -> 72B 0.33914

Excited State 6: 2.006-A 3.3611 eV 368.88 nm f=0.0679 <S\*\*2>=0.756

61B -> 72B -0.22244  
62B -> 72B -0.11867  
64B -> 72B -0.45401

|                   |          |           |           |          |              |
|-------------------|----------|-----------|-----------|----------|--------------|
| 66B -> 72B        | -0.35805 |           |           |          |              |
| 68B -> 72B        | 0.17357  |           |           |          |              |
| 69B -> 72B        | 0.10532  |           |           |          |              |
| 70B -> 72B        | 0.70065  |           |           |          |              |
| 71B -> 72B        | -0.20039 |           |           |          |              |
| Excited State 7:  | 2.006-A  | 3.8849 eV | 319.14 nm | f=0.0653 | <S**2>=0.756 |
| 65B -> 72B        | -0.17541 |           |           |          |              |
| 69B -> 72B        | 0.95923  |           |           |          |              |
| 70B -> 72B        | -0.10814 |           |           |          |              |
| Excited State 8:  | 2.006-A  | 4.4589 eV | 278.06 nm | f=0.0014 | <S**2>=0.756 |
| 61B -> 72B        | 0.10027  |           |           |          |              |
| 64B -> 72B        | 0.27023  |           |           |          |              |
| 65B -> 72B        | 0.19426  |           |           |          |              |
| 67B -> 72B        | 0.19880  |           |           |          |              |
| 68B -> 72B        | 0.90690  |           |           |          |              |
| Excited State 9:  | 2.006-A  | 4.5106 eV | 274.88 nm | f=0.0015 | <S**2>=0.756 |
| 63B -> 72B        | -0.13182 |           |           |          |              |
| 64B -> 72B        | -0.12751 |           |           |          |              |
| 65B -> 72B        | 0.18621  |           |           |          |              |
| 67B -> 72B        | 0.93155  |           |           |          |              |
| 68B -> 72B        | -0.19691 |           |           |          |              |
| Excited State 10: | 2.007-A  | 4.8493 eV | 255.67 nm | f=0.0007 | <S**2>=0.757 |
| 62B -> 72B        | -0.25121 |           |           |          |              |
| 63B -> 72B        | 0.94220  |           |           |          |              |
| 65B -> 72B        | 0.14219  |           |           |          |              |
| Excited State 11: | 3.275-A  | 4.9732 eV | 249.30 nm | f=0.0002 | <S**2>=2.431 |
| 72A -> 73A        | -0.36873 |           |           |          |              |
| 71B -> 73B        | 0.91421  |           |           |          |              |
| Excited State 12: | 2.010-A  | 5.0632 eV | 244.88 nm | f=0.0062 | <S**2>=0.760 |
| 57B -> 72B        | -0.16935 |           |           |          |              |
| 59B -> 72B        | -0.20249 |           |           |          |              |
| 60B -> 72B        | 0.21215  |           |           |          |              |
| 61B -> 72B        | 0.45841  |           |           |          |              |
| 62B -> 72B        | 0.70102  |           |           |          |              |
| 64B -> 72B        | -0.25283 |           |           |          |              |
| 65B -> 72B        | 0.19856  |           |           |          |              |
| 66B -> 72B        | -0.22745 |           |           |          |              |
| Excited State 13: | 2.011-A  | 5.1466 eV | 240.91 nm | f=0.0060 | <S**2>=0.761 |
| 57B -> 72B        | -0.26452 |           |           |          |              |

|                   |          |           |           |                       |
|-------------------|----------|-----------|-----------|-----------------------|
| 58B -> 72B        | -0.40198 |           |           |                       |
| 59B -> 72B        | -0.16904 |           |           |                       |
| 60B -> 72B        | -0.39272 |           |           |                       |
| 61B -> 72B        | 0.59463  |           |           |                       |
| 62B -> 72B        | -0.41743 |           |           |                       |
| 63B -> 72B        | -0.14406 |           |           |                       |
|                   |          |           |           |                       |
| Excited State 14: | 2.278-A  | 5.1506 eV | 240.72 nm | f=0.0004 <S**2>=1.047 |
| 72A -> 73A        | 0.90054  |           |           |                       |
| 60B -> 72B        | -0.14320 |           |           |                       |
| 61B -> 72B        | 0.11593  |           |           |                       |
| 71B -> 73B        | 0.35871  |           |           |                       |
|                   |          |           |           |                       |
| Excited State 15: | 2.013-A  | 5.1925 eV | 238.77 nm | f=0.0043 <S**2>=0.763 |
| 72A -> 73A        | 0.16739  |           |           |                       |
| 57B -> 72B        | -0.34378 |           |           |                       |
| 58B -> 72B        | -0.23979 |           |           |                       |
| 59B -> 72B        | -0.38602 |           |           |                       |
| 60B -> 72B        | 0.67767  |           |           |                       |
| 61B -> 72B        | -0.15547 |           |           |                       |
| 62B -> 72B        | -0.27844 |           |           |                       |
| 63B -> 72B        | -0.10403 |           |           |                       |
| 64B -> 72B        | 0.20743  |           |           |                       |
|                   |          |           |           |                       |
| Excited State 16: | 2.007-A  | 5.3098 eV | 233.50 nm | f=0.0100 <S**2>=0.757 |
| 54B -> 72B        | -0.11084 |           |           |                       |
| 57B -> 72B        | 0.16362  |           |           |                       |
| 58B -> 72B        | -0.50308 |           |           |                       |
| 59B -> 72B        | 0.69983  |           |           |                       |
| 60B -> 72B        | 0.38718  |           |           |                       |
| 61B -> 72B        | 0.11488  |           |           |                       |
| 64B -> 72B        | -0.17337 |           |           |                       |
|                   |          |           |           |                       |
| Excited State 17: | 2.007-A  | 5.4966 eV | 225.56 nm | f=0.0003 <S**2>=0.757 |
| 56B -> 72B        | 0.11091  |           |           |                       |
| 57B -> 72B        | 0.76089  |           |           |                       |
| 58B -> 72B        | -0.37212 |           |           |                       |
| 59B -> 72B        | -0.48879 |           |           |                       |
|                   |          |           |           |                       |
| Excited State 18: | 2.218-A  | 5.7127 eV | 217.03 nm | f=0.0004 <S**2>=0.980 |
| 71A -> 73A        | 0.98002  |           |           |                       |
|                   |          |           |           |                       |
| Excited State 19: | 2.009-A  | 5.8146 eV | 213.23 nm | f=0.0009 <S**2>=0.759 |
| 52B -> 72B        | -0.15977 |           |           |                       |
| 54B -> 72B        | -0.32326 |           |           |                       |
| 56B -> 72B        | 0.89023  |           |           |                       |



57B -> 72B -0.11211  
58B -> 72B 0.13609

Excited State 20: 2.010-A 5.8573 eV 211.67 nm f=0.0026 <S\*\*2>=0.760  
52B -> 72B 0.26823  
53B -> 72B -0.16205  
54B -> 72B 0.54977  
55B -> 72B 0.61178  
56B -> 72B 0.34743  
57B -> 72B -0.10473  
58B -> 72B -0.18622  
59B -> 72B 0.10531

Excited State 21: 2.008-A 5.9539 eV 208.24 nm f=0.0011 <S\*\*2>=0.758  
53B -> 72B 0.19725  
54B -> 72B -0.57338  
55B -> 72B 0.74916  
56B -> 72B -0.16612  
58B -> 72B 0.14073

Excited State 22: 2.007-A 6.2903 eV 197.10 nm f=0.0014 <S\*\*2>=0.757  
53B -> 72B 0.93971  
54B -> 72B 0.24183  
56B -> 72B 0.16458

Excited State 23: 2.009-A 6.4029 eV 193.64 nm f=0.0073 <S\*\*2>=0.759  
51B -> 72B -0.21389  
52B -> 72B 0.89693  
54B -> 72B -0.31309  
55B -> 72B -0.16374

Excited State 24: 3.221-A 6.4815 eV 191.29 nm f=0.0014 <S\*\*2>=2.343  
70A -> 73A -0.10930  
72A -> 74A -0.25787  
72A -> 75A -0.13766  
70B -> 73B 0.24455  
71B -> 74B 0.86602  
71B -> 75B 0.23211

Excited State 25: 2.008-A 6.5305 eV 189.86 nm f=0.0061 <S\*\*2>=0.758  
51B -> 72B 0.96604  
52B -> 72B 0.22759

Excited State 26: 2.366-A 6.6524 eV 186.37 nm f=0.0010 <S\*\*2>=1.150  
70A -> 73A 0.10594  
72A -> 74A 0.85911

72A -> 75A 0.15693  
70B -> 73B -0.14445  
71B -> 74B 0.39827  
71B -> 75B -0.16446

Excited State 27: 3.267-A 6.7592 eV 183.43 nm f=0.0022 <S\*\*2>=2.419

70A -> 73A -0.18173  
72A -> 74A 0.40658  
72A -> 75A -0.20314  
70B -> 73B 0.64153  
71B -> 74B -0.27567  
71B -> 75B 0.48413

Excited State 28: 3.035-A 6.8952 eV 179.81 nm f=0.0031 <S\*\*2>=2.053

72A -> 75A -0.21405  
69B -> 73B 0.11114  
70B -> 73B -0.66606  
71B -> 75B 0.68055

Excited State 29: 2.337-A 7.0160 eV 176.72 nm f=0.0033 <S\*\*2>=1.115

70A -> 73A 0.31515  
72A -> 75A 0.73404  
69B -> 73B -0.37086  
70B -> 73B 0.10071  
71B -> 75B 0.41548

Excited State 30: 2.818-A 7.0330 eV 176.29 nm f=0.0054 <S\*\*2>=1.736

72A -> 75A 0.37751  
69B -> 73B 0.89469

### [Cu(II)L(H<sub>2</sub>O)<sub>3</sub>]<sup>2+</sup>

Excitation energies and oscillator strengths:

Excited State 1: 2.002-A 0.4848 eV 2557.55 nm f=0.0005 <S\*\*2>=0.752

71B -> 77B 0.27131  
73B -> 77B -0.27159  
75B -> 77B -0.18163  
76B -> 77B 0.88887

This state for optimization and/or second-order correction.

Total Energy, E(TD-HF/TD-DFT) = -2388.65843567

Copying the excited state density for this state as the 1-particle RhoCI density.

Excited State 2: 2.001-A 1.8872 eV 656.97 nm f=0.0002 <S\*\*2>=0.751

60B -> 77B 0.16389  
64B -> 77B 0.10618  
65B -> 77B -0.21165

|                  |          |           |           |          |              |
|------------------|----------|-----------|-----------|----------|--------------|
| 68B -> 77B       | 0.26414  |           |           |          |              |
| 70B -> 77B       | 0.37971  |           |           |          |              |
| 71B -> 77B       | -0.29477 |           |           |          |              |
| 72B -> 77B       | 0.75256  |           |           |          |              |
| 75B -> 77B       | -0.12869 |           |           |          |              |
| Excited State 3: | 2.001-A  | 1.9231 eV | 644.72 nm | f=0.0001 | <S**2>=0.751 |
| 67B -> 77B       | -0.14107 |           |           |          |              |
| 69B -> 77B       | 0.58953  |           |           |          |              |
| 70B -> 77B       | 0.30308  |           |           |          |              |
| 71B -> 77B       | 0.55440  |           |           |          |              |
| 72B -> 77B       | 0.16433  |           |           |          |              |
| 73B -> 77B       | 0.41616  |           |           |          |              |
| Excited State 4: | 2.002-A  | 2.1001 eV | 590.38 nm | f=0.0004 | <S**2>=0.752 |
| 60B -> 77B       | 0.39961  |           |           |          |              |
| 61B -> 77B       | 0.11304  |           |           |          |              |
| 62B -> 77B       | 0.38362  |           |           |          |              |
| 63B -> 77B       | -0.18840 |           |           |          |              |
| 64B -> 77B       | -0.24455 |           |           |          |              |
| 65B -> 77B       | 0.19459  |           |           |          |              |
| 66B -> 77B       | -0.25487 |           |           |          |              |
| 67B -> 77B       | 0.57731  |           |           |          |              |
| 68B -> 77B       | -0.14046 |           |           |          |              |
| 70B -> 77B       | 0.28916  |           |           |          |              |
| 72B -> 77B       | -0.11905 |           |           |          |              |
| Excited State 5: | 2.004-A  | 2.9002 eV | 427.50 nm | f=0.0013 | <S**2>=0.754 |
| 71B -> 77B       | -0.43893 |           |           |          |              |
| 73B -> 77B       | 0.39468  |           |           |          |              |
| 75B -> 77B       | 0.65236  |           |           |          |              |
| 76B -> 77B       | 0.42667  |           |           |          |              |
| Excited State 6: | 2.005-A  | 3.5546 eV | 348.80 nm | f=0.0860 | <S**2>=0.755 |
| 67B -> 77B       | 0.15784  |           |           |          |              |
| 71B -> 77B       | 0.34288  |           |           |          |              |
| 72B -> 77B       | 0.16344  |           |           |          |              |
| 73B -> 77B       | -0.52191 |           |           |          |              |
| 75B -> 77B       | 0.70859  |           |           |          |              |
| 76B -> 77B       | -0.16633 |           |           |          |              |
| Excited State 7: | 2.004-A  | 3.9878 eV | 310.91 nm | f=0.0818 | <S**2>=0.754 |
| 74B -> 77B       | 0.98187  |           |           |          |              |
| Excited State 8: | 2.005-A  | 4.5862 eV | 270.34 nm | f=0.0007 | <S**2>=0.755 |
| 67B -> 77B       | 0.16817  |           |           |          |              |

69B -> 77B -0.47639  
70B -> 77B -0.47593  
71B -> 77B 0.31375  
72B -> 77B 0.40842  
73B -> 77B 0.49608

Excited State 9: 2.006-A 4.7669 eV 260.09 nm f=0.0006 <S\*\*2>=0.756

62B -> 77B -0.10202  
63B -> 77B 0.12384  
64B -> 77B 0.19463  
65B -> 77B -0.30229  
66B -> 77B 0.16751  
68B -> 77B 0.31025  
69B -> 77B -0.44793  
70B -> 77B 0.51193  
71B -> 77B 0.27066  
72B -> 77B -0.37140  
73B -> 77B 0.17618

Excited State 10: 2.006-A 4.9417 eV 250.89 nm f=0.0019 <S\*\*2>=0.756

60B -> 77B 0.12345  
62B -> 77B 0.10086  
66B -> 77B -0.12436  
67B -> 77B 0.13335  
68B -> 77B 0.85564  
69B -> 77B 0.28008  
70B -> 77B -0.31207  
72B -> 77B -0.14530

Excited State 11: 2.007-A 5.0592 eV 245.07 nm f=0.0020 <S\*\*2>=0.757

64B -> 77B 0.21479  
65B -> 77B -0.54324  
66B -> 77B 0.25778  
67B -> 77B 0.55946  
68B -> 77B -0.20880  
69B -> 77B 0.35290  
70B -> 77B -0.19726  
71B -> 77B -0.15548  
73B -> 77B 0.14716

Excited State 12: 2.006-A 5.2659 eV 235.45 nm f=0.0010 <S\*\*2>=0.756

60B -> 77B 0.14515  
62B -> 77B 0.17929  
63B -> 77B -0.11240  
64B -> 77B -0.14080  
65B -> 77B 0.30894

|                   |          |           |           |          |              |
|-------------------|----------|-----------|-----------|----------|--------------|
| 66B -> 77B        | 0.89603  |           |           |          |              |
| Excited State 13: | 2.008-A  | 5.3865 eV | 230.18 nm | f=0.0035 | <S**2>=0.758 |
| 60B -> 77B        | 0.49673  |           |           |          |              |
| 61B -> 77B        | 0.12145  |           |           |          |              |
| 62B -> 77B        | 0.44078  |           |           |          |              |
| 65B -> 77B        | -0.48233 |           |           |          |              |
| 67B -> 77B        | -0.47903 |           |           |          |              |
| 68B -> 77B        | -0.12336 |           |           |          |              |
| 70B -> 77B        | -0.17047 |           |           |          |              |
| 72B -> 77B        | -0.12210 |           |           |          |              |
| Excited State 14: | 3.036-A  | 5.5774 eV | 222.30 nm | f=0.0002 | <S**2>=2.054 |
| 77A -> 78A        | -0.16046 |           |           |          |              |
| 76B -> 78B        | 0.97132  |           |           |          |              |
| Excited State 15: | 2.009-A  | 5.6007 eV | 221.37 nm | f=0.0118 | <S**2>=0.759 |
| 62B -> 77B        | 0.10012  |           |           |          |              |
| 63B -> 77B        | -0.64331 |           |           |          |              |
| 64B -> 77B        | 0.72332  |           |           |          |              |
| 65B -> 77B        | 0.17341  |           |           |          |              |
| Excited State 16: | 2.018-A  | 5.6093 eV | 221.03 nm | f=0.0030 | <S**2>=0.768 |
| 60B -> 77B        | 0.19649  |           |           |          |              |
| 62B -> 77B        | 0.21730  |           |           |          |              |
| 63B -> 77B        | 0.70094  |           |           |          |              |
| 64B -> 77B        | 0.51687  |           |           |          |              |
| 65B -> 77B        | 0.35817  |           |           |          |              |
| 76B -> 78B        | -0.10563 |           |           |          |              |
| Excited State 17: | 2.594-A  | 5.7707 eV | 214.85 nm | f=0.0006 | <S**2>=1.432 |
| 77A -> 78A        | 0.97939  |           |           |          |              |
| 76B -> 78B        | 0.16516  |           |           |          |              |
| Excited State 18: | 2.007-A  | 5.7859 eV | 214.29 nm | f=0.0069 | <S**2>=0.757 |
| 60B -> 77B        | -0.63973 |           |           |          |              |
| 61B -> 77B        | -0.14615 |           |           |          |              |
| 62B -> 77B        | 0.72898  |           |           |          |              |
| Excited State 19: | 2.006-A  | 5.8382 eV | 212.37 nm | f=0.0014 | <S**2>=0.756 |
| 60B -> 77B        | -0.21887 |           |           |          |              |
| 61B -> 77B        | 0.96232  |           |           |          |              |
| Excited State 20: | 2.006-A  | 6.2919 eV | 197.05 nm | f=0.0003 | <S**2>=0.756 |
| 57B -> 77B        | -0.12762 |           |           |          |              |
| 58B -> 77B        | 0.24664  |           |           |          |              |

|                   |          |           |           |          |              |
|-------------------|----------|-----------|-----------|----------|--------------|
| 59B -> 77B        | 0.95016  |           |           |          |              |
| Excited State 21: | 2.008-A  | 6.3402 eV | 195.55 nm | f=0.0005 | <S**2>=0.758 |
| 56B -> 77B        | 0.14402  |           |           |          |              |
| 58B -> 77B        | 0.94726  |           |           |          |              |
| 59B -> 77B        | -0.23397 |           |           |          |              |
| Excited State 22: | 2.254-A  | 6.4115 eV | 193.38 nm | f=0.0004 | <S**2>=1.021 |
| 76A -> 78A        | 0.98878  |           |           |          |              |
| Excited State 23: | 3.023-A  | 6.6628 eV | 186.08 nm | f=0.0009 | <S**2>=2.034 |
| 77A -> 79A        | -0.13835 |           |           |          |              |
| 76B -> 79B        | 0.97517  |           |           |          |              |
| Excited State 24: | 2.009-A  | 6.7197 eV | 184.51 nm | f=0.0044 | <S**2>=0.759 |
| 54B -> 77B        | 0.13353  |           |           |          |              |
| 55B -> 77B        | 0.11239  |           |           |          |              |
| 57B -> 77B        | 0.96313  |           |           |          |              |
| 59B -> 77B        | 0.14364  |           |           |          |              |
| Excited State 25: | 2.016-A  | 6.7882 eV | 182.65 nm | f=0.0046 | <S**2>=0.766 |
| 55B -> 77B        | 0.12214  |           |           |          |              |
| 56B -> 77B        | 0.96818  |           |           |          |              |
| 58B -> 77B        | -0.12217 |           |           |          |              |
| Excited State 26: | 2.928-A  | 6.8276 eV | 181.59 nm | f=0.0010 | <S**2>=1.894 |
| 77A -> 79A        | 0.33717  |           |           |          |              |
| 76B -> 80B        | 0.90943  |           |           |          |              |
| 76B -> 81B        | -0.11152 |           |           |          |              |
| Excited State 27: | 2.718-A  | 6.8557 eV | 180.85 nm | f=0.0011 | <S**2>=1.596 |
| 77A -> 79A        | 0.91094  |           |           |          |              |
| 77A -> 80A        | 0.14873  |           |           |          |              |
| 76B -> 79B        | 0.14664  |           |           |          |              |
| 76B -> 80B        | -0.32464 |           |           |          |              |
| Excited State 28: | 2.007-A  | 6.9105 eV | 179.41 nm | f=0.0048 | <S**2>=0.757 |
| 54B -> 77B        | 0.18147  |           |           |          |              |
| 55B -> 77B        | 0.96082  |           |           |          |              |
| 56B -> 77B        | -0.10302 |           |           |          |              |
| 57B -> 77B        | -0.13895 |           |           |          |              |
| Excited State 29: | 2.641-A  | 7.0182 eV | 176.66 nm | f=0.0006 | <S**2>=1.494 |
| 77A -> 80A        | 0.93645  |           |           |          |              |
| 77A -> 81A        | -0.15596 |           |           |          |              |
| 76B -> 80B        | 0.16645  |           |           |          |              |

76B -> 81B 0.18310

Excited State 30: 3.013-A 7.0706 eV 175.35 nm f=0.0046 <S\*\*2>=2.020  
77A -> 80A -0.21947  
77A -> 81A -0.11735  
76B -> 81B 0.95036  
76B -> 82B -0.10832

### **[Cu(II)LAsc], conformer 1**

TD-B3LYP method:

Excitation energies and oscillator strengths:

Excited State 1: 2.015-A 1.5764 eV 786.50 nm f=0.0002 <S\*\*2>=0.765  
102B ->108B 0.11665  
105B ->108B 0.42276  
106B ->108B 0.87275  
107B ->108B 0.15093

This state for optimization and/or second-order correction.

Total Energy, E(TD-HF/TD-DFT) = -2842.84036663

Copying the excited state density for this state as the 1-particle RhoCI density.

Excited State 2: 2.012-A 1.6634 eV 745.35 nm f=0.0123 <S\*\*2>=0.762  
105B ->108B 0.70490  
106B ->108B -0.22858  
107B ->108B -0.66320

Excited State 3: 2.013-A 1.8898 eV 656.06 nm f=0.0484 <S\*\*2>=0.763  
105B ->108B 0.54676  
106B ->108B -0.40440  
107B ->108B 0.71793

Excited State 4: 2.030-A 2.3111 eV 536.46 nm f=0.0011 <S\*\*2>=0.780  
102B ->108B -0.60064  
103B ->108B -0.29000  
104B ->108B 0.70325  
105B ->108B 0.11393  
106B ->108B 0.10188

Excited State 5: 2.013-A 2.4365 eV 508.86 nm f=0.0009 <S\*\*2>=0.763  
102B ->108B 0.72936  
103B ->108B -0.53616  
104B ->108B 0.41667

Excited State 6: 2.013-A 2.4638 eV 503.22 nm f=0.0044 <S\*\*2>=0.763  
102B ->108B 0.26879

103B ->108B 0.78726  
104B ->108B 0.54755

Excited State 7: 2.146-A 3.3016 eV 375.52 nm f=0.0002 <S\*\*2>=0.901

99B ->108B 0.14548  
100B ->108B 0.53178  
101B ->108B 0.76646  
102B ->112B -0.12491  
104B ->112B 0.11625

Excited State 8: 2.082-A 3.6428 eV 340.35 nm f=0.0128 <S\*\*2>=0.834

106A ->110A -0.10589  
108A ->109A -0.39508  
108A ->110A 0.59243  
93B ->108B 0.10102  
94B ->108B 0.10057  
99B ->108B -0.39166  
100B ->108B 0.42926  
101B ->108B -0.23960  
107B ->112B 0.12035

Excited State 9: 2.075-A 3.9063 eV 317.40 nm f=0.0269 <S\*\*2>=0.826

99A ->110A -0.10306  
108A ->109A 0.52808  
108A ->110A -0.33368  
93B ->108B -0.13404  
94B ->108B -0.10890  
99B ->108B -0.37560  
100B ->108B 0.52677  
101B ->108B -0.30147

Excited State 10: 2.376-A 3.9471 eV 314.12 nm f=0.0029 <S\*\*2>=1.162

106A ->109A 0.13786  
108A ->109A 0.61067  
108A ->110A 0.59772  
108A ->111A 0.24411  
108A ->115A 0.15093  
99B ->108B 0.11645  
100B ->108B -0.16244  
107B ->109B 0.19325

Excited State 11: 2.092-A 4.0991 eV 302.46 nm f=0.0007 <S\*\*2>=0.844

93B ->108B -0.20716  
94B ->108B 0.41363  
95B ->108B -0.41621  
96B ->108B 0.13818



|             |          |
|-------------|----------|
| 98B ->108B  | -0.22054 |
| 99B ->108B  | 0.52268  |
| 100B ->108B | 0.24419  |
| 101B ->108B | -0.38212 |

Excited State 12: 2.847-A 4.1543 eV 298.44 nm f=0.0008 <S\*\*2>=1.777

|             |          |
|-------------|----------|
| 108A ->109A | -0.19179 |
| 108A ->110A | -0.17458 |
| 99B ->108B  | -0.16014 |
| 107B ->109B | 0.83693  |
| 107B ->110B | 0.29128  |
| 107B ->115B | 0.18112  |

Excited State 13: 2.096-A 4.1906 eV 295.86 nm f=0.0008 <S\*\*2>=0.849

|             |          |
|-------------|----------|
| 93B ->108B  | 0.27039  |
| 94B ->108B  | -0.36689 |
| 95B ->108B  | 0.43396  |
| 96B ->108B  | -0.12239 |
| 98B ->108B  | 0.20358  |
| 99B ->108B  | 0.55774  |
| 100B ->108B | 0.32136  |
| 101B ->108B | -0.24556 |
| 107B ->109B | 0.15361  |

Excited State 14: 3.426-A 4.2845 eV 289.38 nm f=0.0001 <S\*\*2>=2.685

|             |          |
|-------------|----------|
| 107A ->109A | -0.47810 |
| 107A ->110A | -0.25919 |
| 107A ->111A | -0.19845 |
| 107A ->115A | -0.13507 |
| 106B ->109B | 0.68257  |
| 106B ->110B | 0.25246  |
| 106B ->115B | 0.16701  |

Excited State 15: 2.099-A 4.4134 eV 280.92 nm f=0.0006 <S\*\*2>=0.851

|             |         |
|-------------|---------|
| 107A ->109A | 0.64257 |
| 107A ->110A | 0.31075 |
| 107A ->111A | 0.21974 |
| 107A ->115A | 0.12886 |
| 106B ->109B | 0.56774 |
| 106B ->110B | 0.16823 |

Excited State 16: 2.327-A 4.4864 eV 276.36 nm f=0.0001 <S\*\*2>=1.103

|             |          |
|-------------|----------|
| 106A ->109A | 0.12929  |
| 106A ->111A | 0.19851  |
| 107A ->109A | 0.10521  |
| 108A ->109A | -0.25024 |

108A ->110A -0.14983  
108A ->111A 0.85957  
105B ->109B -0.17249  
107B ->109B -0.12073

Excited State 17: 2.963-A 4.4955 eV 275.80 nm f=0.0002 <S\*\*2>=1.946

102A ->109A -0.22309  
102A ->110A 0.39444  
104A ->110A -0.16575  
105A ->109A -0.26622  
105A ->110A 0.32719  
106A ->109A -0.28415  
106A ->110A 0.30348  
107A ->109A -0.22276  
107A ->110A 0.47987  
108A ->111A 0.19173

Excited State 18: 3.206-A 4.5204 eV 274.27 nm f=0.0005 <S\*\*2>=2.319

102A ->109A 0.13233  
105A ->109A -0.20585  
105A ->110A -0.20635  
105A ->111A -0.15028  
105A ->115A -0.10654  
106A ->109A -0.35237  
106A ->110A -0.29444  
106A ->111A -0.13285  
106A ->115A -0.12527  
107A ->110A -0.15080  
108A ->111A 0.27194  
105B ->109B 0.55849  
105B ->110B 0.23213  
105B ->115B 0.17262  
107B ->109B 0.14397

Excited State 19: 2.187-A 4.6286 eV 267.86 nm f=0.0035 <S\*\*2>=0.946

105A ->109A 0.12479  
106A ->112A 0.11507  
108A ->112A 0.94504

Excited State 20: 2.896-A 4.6628 eV 265.90 nm f=0.0017 <S\*\*2>=1.847

102A ->110A -0.11738  
105A ->110A -0.17506  
106A ->109A 0.36324  
106A ->110A -0.40779  
107A ->109A -0.32935  
107A ->110A 0.62173

|             |          |
|-------------|----------|
| 108A ->110A | -0.14002 |
| 93B ->108B  | 0.15105  |
| 98B ->108B  | -0.13042 |
| 105B ->109B | 0.10974  |

Excited State 21: 2.776-A 4.6763 eV 265.13 nm f=0.0017 <S\*\*2>=1.677

|             |          |
|-------------|----------|
| 105A ->109A | -0.12072 |
| 106A ->109A | 0.16230  |
| 106A ->110A | 0.15425  |
| 108A ->112A | 0.11892  |
| 105B ->109B | 0.23509  |
| 107B ->109B | -0.36025 |
| 107B ->110B | 0.80041  |

Excited State 22: 2.487-A 4.7231 eV 262.51 nm f=0.0105 <S\*\*2>=1.297

|             |          |
|-------------|----------|
| 105A ->109A | -0.19073 |
| 106A ->109A | 0.41147  |
| 106A ->110A | 0.26160  |
| 106A ->111A | 0.11418  |
| 107A ->110A | -0.20008 |
| 108A ->110A | -0.10292 |
| 93B ->108B  | 0.21047  |
| 94B ->108B  | 0.11437  |
| 95B ->108B  | 0.17067  |
| 96B ->108B  | 0.14774  |
| 97B ->108B  | 0.28561  |
| 98B ->108B  | -0.29391 |
| 105B ->109B | 0.28859  |
| 106B ->109B | 0.11770  |
| 107B ->110B | -0.39910 |
| 107B ->112B | -0.16778 |

Excited State 23: 2.434-A 4.7630 eV 260.31 nm f=0.0082 <S\*\*2>=1.231

|             |          |
|-------------|----------|
| 105A ->109A | 0.38330  |
| 105A ->110A | 0.29464  |
| 105A ->111A | 0.16388  |
| 105A ->115A | 0.12063  |
| 106A ->109A | -0.31866 |
| 106A ->110A | -0.21501 |
| 107A ->109A | 0.13059  |
| 108A ->109A | 0.15975  |
| 108A ->112A | -0.17102 |
| 93B ->108B  | 0.30779  |
| 94B ->108B  | 0.19391  |
| 95B ->108B  | 0.21383  |
| 96B ->108B  | 0.10178  |

|             |          |
|-------------|----------|
| 97B ->108B  | 0.11272  |
| 98B ->108B  | -0.37237 |
| 107B ->110B | 0.18315  |
| 107B ->112B | -0.16624 |

Excited State 24: 2.743-A 4.8079 eV 257.88 nm f=0.0003 <S\*\*2>=1.631

|             |          |
|-------------|----------|
| 102A ->110A | -0.14162 |
| 105A ->109A | 0.45178  |
| 105A ->110A | -0.24830 |
| 106A ->109A | -0.17327 |
| 106A ->110A | 0.33212  |
| 107A ->109A | -0.14885 |
| 107A ->110A | 0.20713  |
| 108A ->110A | 0.16319  |
| 93B ->108B  | -0.18086 |
| 94B ->108B  | -0.12115 |
| 96B ->108B  | 0.11054  |
| 97B ->108B  | 0.45343  |
| 98B ->108B  | 0.11727  |
| 105B ->109B | 0.19474  |
| 107B ->112B | -0.27387 |

Excited State 25: 3.177-A 4.8504 eV 255.61 nm f=0.0001 <S\*\*2>=2.273

|             |          |
|-------------|----------|
| 105A ->110A | -0.13305 |
| 106A ->110A | 0.12615  |
| 107A ->110A | 0.11650  |
| 107A ->111A | -0.24609 |
| 106B ->109B | -0.32499 |
| 106B ->110B | 0.83661  |
| 107B ->112B | -0.11739 |

Excited State 26: 2.708-A 4.8508 eV 255.59 nm f=0.0020 <S\*\*2>=1.584

|             |          |
|-------------|----------|
| 105A ->109A | 0.15342  |
| 105A ->110A | 0.42838  |
| 105A ->111A | 0.10820  |
| 106A ->109A | 0.21585  |
| 106A ->110A | -0.23297 |
| 93B ->108B  | -0.18782 |
| 94B ->108B  | -0.13774 |
| 95B ->108B  | -0.17331 |
| 97B ->108B  | 0.44940  |
| 98B ->108B  | 0.17287  |
| 105B ->109B | 0.22893  |
| 106B ->110B | 0.20441  |
| 107B ->112B | 0.40643  |

Excited State 27: 2.206-A 4.8631 eV 254.95 nm f=0.0008 <S\*\*2>=0.967  
105A ->109A -0.28918  
105A ->110A -0.23515  
105A ->111A -0.11005  
106A ->109A -0.17212  
96B ->108B -0.22571  
97B ->108B 0.59699  
98B ->108B -0.12297  
105B ->109B -0.36027  
107B ->111B 0.41353

Excited State 28: 2.754-A 4.8846 eV 253.83 nm f=0.0021 <S\*\*2>=1.646  
105A ->109A 0.18568  
106A ->110A 0.15286  
108A ->113A 0.16864  
108A ->114A -0.14076  
96B ->108B 0.14806  
97B ->108B -0.20463  
105B ->109B 0.14655  
107B ->111B 0.83579  
107B ->112B 0.20541

Excited State 29: 2.345-A 4.8987 eV 253.10 nm f=0.0008 <S\*\*2>=1.125  
107A ->109A -0.23447  
107A ->110A -0.16999  
107A ->111A 0.81421  
108A ->113A 0.24010  
108A ->114A -0.20435  
106B ->110B 0.29601

Excited State 30: 2.201-A 4.9123 eV 252.40 nm f=0.0007 <S\*\*2>=0.961  
107A ->111A -0.33227  
108A ->113A 0.66063  
108A ->114A -0.54669  
108A ->115A -0.11527  
96B ->108B -0.14921  
97B ->108B 0.11070  
107B ->111B -0.14061

M06 method:

Excitation energies and oscillator strengths:

Excited State 1: 2.018-A 1.7276 eV 717.67 nm f=0.0000 <S\*\*2>=0.768  
104B ->108B -0.24819  
105B ->108B 0.61040  
106B ->108B 0.73147

This state for optimization and/or second-order correction.

Total Energy, E(TD-HF/TD-DFT) = -2842.01564230

Copying the excited state density for this state as the 1-particle RhoCl density.

Excited State 2: 2.013-A 1.9289 eV 642.79 nm f=0.0125 <S\*\*2>=0.763

105B ->108B -0.54725

106B ->108B 0.39419

107B ->108B 0.72458

Excited State 3: 2.014-A 2.1342 eV 580.95 nm f=0.0396 <S\*\*2>=0.764

105B ->108B 0.52330

106B ->108B -0.50935

107B ->108B 0.66529

Excited State 4: 2.029-A 2.4779 eV 500.37 nm f=0.0020 <S\*\*2>=0.779

100B ->108B -0.10550

104B ->108B 0.93723

105B ->108B 0.18130

106B ->108B 0.17687

107B ->108B 0.11755

Excited State 5: 2.013-A 2.7642 eV 448.53 nm f=0.0008 <S\*\*2>=0.763

103B ->108B 0.99172

Excited State 6: 2.013-A 2.8155 eV 440.37 nm f=0.0031 <S\*\*2>=0.763

102B ->108B 0.99132

Excited State 7: 2.145-A 3.4477 eV 359.61 nm f=0.0001 <S\*\*2>=0.900

94B ->108B -0.10092

96B ->108B 0.10491

99B ->108B 0.12411

100B ->108B 0.66927

101B ->108B -0.63069

104B ->108B 0.15215

104B ->112B 0.16659

104B ->113B -0.10723

Excited State 8: 2.044-A 3.7497 eV 330.65 nm f=0.0270 <S\*\*2>=0.794

106A ->110A 0.13559

108A ->109A -0.19692

108A ->110A 0.82099

93B ->108B -0.16592

99B ->108B -0.30011

100B ->108B 0.21870

101B ->108B 0.19980

Excited State 9: 2.316-A 3.8981 eV 318.06 nm f=0.0003 <S\*\*2>=1.091

|             |          |
|-------------|----------|
| 106A ->109A | -0.18407 |
| 108A ->109A | 0.89915  |
| 108A ->110A | 0.15937  |
| 108A ->111A | 0.13925  |
| 108A ->115A | 0.14089  |
| 107B ->109B | 0.12345  |

Excited State 10: 2.086-A 4.1040 eV 302.11 nm f=0.0255 <S\*\*2>=0.838

|             |          |
|-------------|----------|
| 99A ->110A  | 0.12729  |
| 108A ->110A | 0.40073  |
| 93B ->108B  | -0.14186 |
| 99B ->108B  | 0.55188  |
| 100B ->108B | -0.51443 |
| 101B ->108B | -0.43435 |

Excited State 11: 2.109-A 4.2015 eV 295.10 nm f=0.0006 <S\*\*2>=0.862

|             |          |
|-------------|----------|
| 93B ->108B  | -0.19965 |
| 94B ->108B  | 0.72555  |
| 95B ->108B  | 0.38136  |
| 96B ->108B  | -0.12895 |
| 98B ->108B  | 0.31141  |
| 99B ->108B  | -0.14672 |
| 101B ->108B | -0.22834 |
| 107B ->109B | 0.13513  |

Excited State 12: 3.135-A 4.2331 eV 292.89 nm f=0.0002 <S\*\*2>=2.207

|             |          |
|-------------|----------|
| 107A ->109A | -0.34409 |
| 108A ->109A | -0.17530 |
| 106B ->109B | 0.28156  |
| 107B ->109B | 0.75228  |
| 107B ->110B | 0.14956  |
| 107B ->115B | 0.14166  |
| 107B ->122B | 0.10003  |

Excited State 13: 3.220-A 4.3280 eV 286.47 nm f=0.0001 <S\*\*2>=2.342

|             |          |
|-------------|----------|
| 106A ->109A | -0.12523 |
| 107A ->109A | 0.53989  |
| 107A ->111A | 0.10581  |
| 107A ->115A | 0.10911  |
| 105B ->109B | 0.12984  |
| 106B ->109B | -0.53341 |
| 106B ->110B | -0.10998 |
| 106B ->115B | -0.11152 |
| 107B ->109B | 0.46896  |

Excited State 14: 2.047-A 4.4227 eV 280.34 nm f=0.0010 <S\*\*2>=0.798  
93B ->108B -0.15284  
94B ->108B 0.15433  
95B ->108B 0.13273  
99B ->108B 0.69720  
100B ->108B 0.38616  
101B ->108B 0.52134

Excited State 15: 2.102-A 4.4663 eV 277.60 nm f=0.0008 <S\*\*2>=0.855  
107A ->109A 0.63573  
107A ->111A 0.10857  
107A ->115A 0.10092  
106B ->109B 0.68090  
106B ->110B 0.12019  
106B ->115B 0.10728

Excited State 16: 3.331-A 4.5958 eV 269.78 nm f=0.0002 <S\*\*2>=2.524  
104A ->109A -0.14017  
105A ->109A -0.39406  
105A ->115A -0.11026  
106A ->109A 0.38086  
107A ->109A -0.13915  
104B ->109B 0.17016  
105B ->109B 0.62399  
105B ->110B 0.13768  
105B ->115B 0.15189  
105B ->119B -0.10876  
105B ->122B 0.10543

Excited State 17: 2.922-A 4.7142 eV 263.00 nm f=0.0000 <S\*\*2>=1.885  
103A ->110A 0.17126  
104A ->110A -0.50159  
105A ->110A 0.54457  
106A ->109A 0.25718  
106A ->110A -0.28915  
107A ->110A 0.40172  
105B ->109B -0.12722

Excited State 18: 2.606-A 4.7283 eV 262.22 nm f=0.0007 <S\*\*2>=1.447  
104A ->110A 0.19079  
105A ->109A 0.35827  
105A ->110A -0.17779  
106A ->109A 0.68248  
106A ->110A 0.12842  
106A ->111A 0.14188  
106A ->115A 0.11047



|             |          |
|-------------|----------|
| 107A ->110A | -0.15767 |
| 108A ->109A | 0.20910  |
| 108A ->111A | -0.16879 |
| 108A ->112A | 0.13855  |
| 105B ->109B | -0.15313 |
| 106B ->109B | -0.11348 |
| 107B ->109B | 0.15552  |

Excited State 19: 2.089-A 4.8118 eV 257.67 nm f=0.0267 <S\*\*2>=0.841

|             |          |
|-------------|----------|
| 105A ->109A | -0.24783 |
| 106A ->109A | 0.13711  |
| 108A ->110A | 0.20668  |
| 108A ->111A | 0.23231  |
| 108A ->112A | -0.32323 |
| 92B ->108B  | 0.13196  |
| 93B ->108B  | 0.49290  |
| 94B ->108B  | 0.15167  |
| 95B ->108B  | -0.28091 |
| 97B ->108B  | -0.11400 |
| 98B ->108B  | 0.41194  |
| 99B ->108B  | 0.10743  |
| 105B ->109B | -0.21693 |

Excited State 20: 2.215-A 4.8364 eV 256.35 nm f=0.0029 <S\*\*2>=0.977

|             |          |
|-------------|----------|
| 105A ->109A | 0.11707  |
| 106A ->109A | 0.22233  |
| 106A ->111A | -0.16146 |
| 108A ->111A | 0.90186  |
| 93B ->108B  | -0.16318 |
| 98B ->108B  | -0.12093 |

Excited State 21: 2.183-A 4.9046 eV 252.79 nm f=0.0029 <S\*\*2>=0.942

|             |          |
|-------------|----------|
| 105A ->109A | -0.16552 |
| 106A ->112A | -0.13786 |
| 108A ->109A | -0.10820 |
| 108A ->112A | 0.88012  |
| 93B ->108B  | 0.11852  |
| 95B ->108B  | -0.10222 |
| 98B ->108B  | 0.17962  |
| 105B ->109B | -0.11890 |

Excited State 22: 2.094-A 4.9503 eV 250.46 nm f=0.0060 <S\*\*2>=0.846

|             |          |
|-------------|----------|
| 104A ->109A | 0.12154  |
| 105A ->109A | 0.51022  |
| 106A ->109A | -0.12607 |
| 106A ->110A | -0.13735 |

108A ->110A 0.16948  
93B ->108B 0.36504  
94B ->108B 0.11701  
96B ->108B 0.16342  
97B ->108B 0.38227  
105B ->109B 0.45171

Excited State 23: 2.088-A 5.0088 eV 247.53 nm f=0.0011 <S\*\*2>=0.840

103A ->109A -0.11236  
105A ->109A -0.27898  
106A ->109A 0.13908  
106A ->110A -0.11265  
107A ->110A -0.14151  
97B ->108B 0.79856  
98B ->108B -0.25809  
105B ->109B -0.26520

Excited State 24: 2.900-A 5.0513 eV 245.45 nm f=0.0029 <S\*\*2>=1.852

100A ->110A 0.10737  
105A ->110A -0.23701  
106A ->110A 0.41949  
107A ->110A 0.75916  
95B ->108B -0.17202  
96B ->108B -0.10642  
97B ->108B 0.22176

Excited State 25: 3.433-A 5.0781 eV 244.15 nm f=0.0000 <S\*\*2>=2.697

102A ->109A 0.12103  
103A ->109A -0.51762  
103A ->111A -0.12113  
103A ->115A -0.14297  
103A ->119A 0.10186  
103A ->122A -0.10541  
104A ->109A -0.16869  
103B ->109B 0.64942  
103B ->110B 0.15585  
103B ->115B 0.16986  
103B ->119B -0.11849  
103B ->122B 0.11690

Excited State 26: 3.432-A 5.0822 eV 243.96 nm f=0.0001 <S\*\*2>=2.695

102A ->109A -0.55138  
102A ->111A -0.12970  
102A ->115A -0.15307  
102A ->119A 0.10690  
102A ->122A -0.11237

|             |          |
|-------------|----------|
| 103A ->109A | -0.10559 |
| 104A ->109A | -0.11464 |
| 102B ->109B | 0.62975  |
| 102B ->110B | 0.15157  |
| 102B ->115B | 0.16670  |
| 102B ->119B | -0.11491 |
| 102B ->122B | 0.11496  |

Excited State 27: 2.524-A 5.1382 eV 241.30 nm f=0.0002 <S\*\*2>=1.343

|             |          |
|-------------|----------|
| 105A ->109A | -0.10688 |
| 105A ->110A | -0.17377 |
| 106A ->109A | 0.10020  |
| 106A ->110A | -0.18165 |
| 107A ->110A | 0.20141  |
| 108A ->113A | 0.22985  |
| 108A ->114A | 0.42385  |
| 95B ->108B  | 0.24414  |
| 96B ->108B  | 0.41081  |
| 98B ->108B  | -0.11887 |
| 103B ->109B | -0.11509 |
| 107B ->109B | -0.12063 |
| 107B ->110B | 0.50278  |

Excited State 28: 2.660-A 5.1470 eV 240.89 nm f=0.0006 <S\*\*2>=1.519

|             |          |
|-------------|----------|
| 105A ->110A | 0.11884  |
| 106A ->110A | 0.15213  |
| 107A ->110A | -0.13936 |
| 93B ->108B  | -0.10249 |
| 95B ->108B  | -0.22387 |
| 96B ->108B  | -0.41508 |
| 98B ->108B  | 0.10031  |
| 107B ->109B | -0.17810 |
| 107B ->110B | 0.77324  |

Excited State 29: 2.244-A 5.1657 eV 240.01 nm f=0.0003 <S\*\*2>=1.009

|             |          |
|-------------|----------|
| 105A ->110A | 0.13589  |
| 106A ->110A | 0.20875  |
| 107A ->110A | -0.13386 |
| 108A ->113A | 0.51283  |
| 108A ->114A | 0.63049  |
| 108A ->118A | 0.10167  |
| 95B ->108B  | -0.13471 |
| 96B ->108B  | -0.27786 |
| 107B ->110B | -0.23118 |

Excited State 30: 2.819-A 5.2092 eV 238.01 nm f=0.0041 <S\*\*2>=1.737

|             |          |
|-------------|----------|
| 103A ->109A | -0.13615 |
| 104A ->110A | -0.13722 |
| 105A ->110A | 0.32063  |
| 106A ->110A | 0.60444  |
| 107A ->110A | -0.19920 |
| 93B ->108B  | 0.10435  |
| 94B ->108B  | 0.12152  |
| 96B ->108B  | 0.47010  |
| 98B ->108B  | -0.11316 |
| 107B ->111B | -0.28484 |
| 107B ->112B | 0.11491  |
| 107B ->113B | -0.15447 |

### **[Cu(II)LAsc], conformer 2**

Excitation energies and oscillator strengths:

Excited State 1: 2.025-A 1.5942 eV 777.72 nm f=0.0000 <S\*\*2>=0.775

|             |          |
|-------------|----------|
| 101B ->108B | -0.12179 |
| 104B ->108B | 0.63764  |
| 105B ->108B | 0.16356  |
| 106B ->108B | -0.28767 |
| 107B ->108B | 0.67243  |

This state for optimization and/or second-order correction.

Total Energy, E(TD-HF/TD-DFT) = -2842.83659604

Copying the excited state density for this state as the 1-particle RhoCI density.

Excited State 2: 2.036-A 2.0810 eV 595.80 nm f=0.0114 <S\*\*2>=0.786

|             |          |
|-------------|----------|
| 104B ->108B | -0.18192 |
| 105B ->108B | -0.10902 |
| 106B ->108B | 0.80465  |
| 107B ->108B | 0.54459  |

Excited State 3: 2.040-A 2.1714 eV 570.98 nm f=0.0008 <S\*\*2>=0.791

|             |          |
|-------------|----------|
| 104B ->108B | 0.63262  |
| 105B ->108B | 0.32532  |
| 106B ->108B | 0.50626  |
| 107B ->108B | -0.46608 |

Excited State 4: 2.034-A 2.4320 eV 509.80 nm f=0.0002 <S\*\*2>=0.784

|             |          |
|-------------|----------|
| 104B ->108B | -0.36006 |
| 105B ->108B | 0.91790  |
| 107B ->108B | 0.11465  |

Excited State 5: 2.030-A 2.8462 eV 435.62 nm f=0.0001 <S\*\*2>=0.780

|             |         |
|-------------|---------|
| 102B ->108B | 0.12693 |
| 103B ->108B | 0.98605 |

Excited State 6: 2.030-A 2.8576 eV 433.88 nm f=0.0016 <S\*\*2>=0.780  
102B ->108B 0.98680  
103B ->108B -0.12843

Excited State 7: 2.189-A 3.1693 eV 391.20 nm f=0.0000 <S\*\*2>=0.948  
104A ->109A -0.13598  
100B ->108B 0.34025  
101B ->108B 0.85778  
104B ->110B -0.22336  
107B ->108B 0.11064

Excited State 8: 2.045-A 3.3878 eV 365.97 nm f=0.0750 <S\*\*2>=0.796  
108A ->109A 0.94528  
96B ->108B 0.17367  
99B ->108B -0.17641

Excited State 9: 2.723-A 3.8223 eV 324.37 nm f=0.0001 <S\*\*2>=1.603  
106A ->110A -0.37355  
106A ->111A -0.10481  
107A ->110A -0.15798  
108A ->110A 0.80653  
108A ->111A 0.14850  
106B ->109B 0.20439  
107B ->109B 0.16812

Excited State 10: 3.403-A 3.9292 eV 315.55 nm f=0.0000 <S\*\*2>=2.645  
106A ->110A 0.12618  
107A ->109A 0.17178  
107A ->110A -0.56847  
107A ->111A -0.15391  
107A ->115A 0.11942  
108A ->110A -0.16221  
106B ->109B -0.17895  
107B ->109B 0.62834  
107B ->111B 0.16494  
107B ->115B -0.12518

Excited State 11: 2.966-A 3.9572 eV 313.31 nm f=0.0002 <S\*\*2>=1.950  
104A ->109A 0.47233  
105A ->109A 0.15182  
107A ->109A 0.80656  
107A ->110A 0.10130  
101B ->108B 0.13738  
107B ->109B -0.14498

Excited State 12: 2.855-A 4.0004 eV 309.93 nm f=0.0004 <S\*\*2>=1.788  
106A ->110A -0.18486  
107A ->110A 0.17846  
108A ->110A -0.37587  
106B ->109B 0.73217  
106B ->111B 0.18999  
106B ->114B 0.10102  
106B ->115B -0.14263  
107B ->109B 0.32436

Excited State 13: 2.046-A 4.0764 eV 304.15 nm f=0.0004 <S\*\*2>=0.796  
107A ->110A 0.67756  
107A ->111A 0.14923  
108A ->110A 0.10847  
106B ->109B -0.34668  
107B ->109B 0.54423  
107B ->111B 0.11363

Excited State 14: 3.031-A 4.1558 eV 298.34 nm f=0.0086 <S\*\*2>=2.046  
104A ->109A -0.13993  
106A ->109A 0.90443  
107A ->109A 0.21437  
105B ->109B -0.12090  
106B ->109B -0.10000  
106B ->110B 0.15723

Excited State 15: 2.267-A 4.2160 eV 294.08 nm f=0.0010 <S\*\*2>=1.035  
106A ->110A 0.78183  
106A ->111A 0.18815  
106A ->115A -0.12345  
108A ->110A 0.33671  
105B ->109B 0.15912  
106B ->109B 0.33707

Excited State 16: 2.919-A 4.2600 eV 291.05 nm f=0.0001 <S\*\*2>=1.880  
104A ->109A 0.65160  
105A ->109A 0.36163  
106A ->109A 0.25168  
107A ->109A -0.49838  
101B ->108B 0.16112  
104B ->110B 0.17101  
107B ->110B 0.15165

Excited State 17: 3.414-A 4.2825 eV 289.51 nm f=0.0002 <S\*\*2>=2.664  
105A ->110A 0.61365  
105A ->111A 0.19236

105A ->114A 0.10651  
105A ->115A -0.16533  
106A ->109A -0.12554  
106A ->110A 0.18032  
104B ->109B 0.11789  
105B ->109B -0.57077  
105B ->111B -0.18087  
105B ->114B -0.10024  
105B ->115B 0.15447

Excited State 18: 2.032-A 4.3503 eV 285.00 nm f=0.0139 <S\*\*2>=0.783

108A ->109A -0.10314  
99B ->108B -0.10545  
100B ->108B 0.90790  
101B ->108B -0.34953

Excited State 19: 2.259-A 4.4736 eV 277.15 nm f=0.0002 <S\*\*2>=1.026

106A ->110A 0.16042  
106A ->111A -0.22944  
108A ->110A -0.14154  
108A ->111A 0.93645

Excited State 20: 2.736-A 4.4836 eV 276.53 nm f=0.0001 <S\*\*2>=1.622

105A ->109A 0.67463  
104B ->110B -0.31347  
105B ->110B -0.10040  
106B ->110B 0.22515  
107B ->110B -0.56867

Excited State 21: 2.774-A 4.5028 eV 275.35 nm f=0.0013 <S\*\*2>=1.674

104A ->109A -0.47123  
105A ->109A 0.59256  
104B ->110B 0.20855  
105B ->110B 0.11814  
106B ->110B -0.14940  
107B ->110B 0.51762

Excited State 22: 2.126-A 4.5469 eV 272.68 nm f=0.0767 <S\*\*2>=0.880

106A ->109A -0.10072  
108A ->109A -0.19459  
108A ->112A 0.57442  
94B ->108B -0.23948  
96B ->108B 0.40082  
99B ->108B -0.50582  
100B ->108B -0.13979  
107B ->110B -0.12700

Excited State 23: 2.367-A 4.6094 eV 268.98 nm f=0.0418 <S\*\*2>=1.150

|             |          |
|-------------|----------|
| 105A ->110A | 0.13791  |
| 106A ->112A | -0.20833 |
| 108A ->109A | 0.10244  |
| 108A ->112A | 0.67851  |
| 94B ->108B  | 0.17253  |
| 96B ->108B  | -0.23732 |
| 99B ->108B  | 0.36090  |
| 105B ->109B | 0.18974  |
| 106B ->110B | 0.32304  |
| 107B ->110B | 0.16512  |

Excited State 24: 2.268-A 4.6180 eV 268.48 nm f=0.0000 <S\*\*2>=1.036

|             |          |
|-------------|----------|
| 105A ->110A | 0.38615  |
| 106A ->109A | -0.10646 |
| 106A ->112A | 0.10577  |
| 108A ->112A | -0.31837 |
| 94B ->108B  | -0.17271 |
| 96B ->108B  | 0.18722  |
| 98B ->108B  | -0.10831 |
| 99B ->108B  | -0.13468 |
| 105B ->109B | 0.41396  |
| 106B ->110B | 0.57061  |
| 107B ->110B | 0.19519  |

Excited State 25: 3.206-A 4.6653 eV 265.76 nm f=0.0002 <S\*\*2>=2.320

|             |          |
|-------------|----------|
| 107A ->110A | 0.12856  |
| 107A ->111A | -0.29710 |
| 107B ->109B | -0.27148 |
| 107B ->111B | 0.87251  |

Excited State 26: 3.459-A 4.6804 eV 264.90 nm f=0.0001 <S\*\*2>=2.741

|             |          |
|-------------|----------|
| 103A ->110A | 0.61894  |
| 103A ->111A | 0.19749  |
| 103A ->114A | 0.10744  |
| 103A ->115A | -0.16404 |
| 103B ->109B | -0.60261 |
| 103B ->111B | -0.19403 |
| 103B ->114B | -0.10582 |
| 103B ->115B | 0.16187  |

Excited State 27: 3.456-A 4.6911 eV 264.30 nm f=0.0000 <S\*\*2>=2.736

|             |          |
|-------------|----------|
| 102A ->110A | -0.59472 |
| 102A ->111A | -0.19040 |
| 102A ->114A | -0.10428 |



|             |          |
|-------------|----------|
| 102A ->115A | 0.15949  |
| 102B ->109B | 0.62517  |
| 102B ->111B | 0.19967  |
| 102B ->114B | 0.10842  |
| 102B ->115B | -0.16556 |

Excited State 28: 2.747-A 4.7042 eV 263.56 nm f=0.0018 <S\*\*2>=1.637

|             |          |
|-------------|----------|
| 106A ->111A | -0.10918 |
| 107A ->110A | -0.22373 |
| 107A ->111A | 0.77511  |
| 106B ->109B | -0.14466 |
| 106B ->111B | 0.41700  |
| 107B ->111B | 0.25438  |

Excited State 29: 2.564-A 4.7229 eV 262.52 nm f=0.0016 <S\*\*2>=1.394

|             |          |
|-------------|----------|
| 107A ->111A | -0.41505 |
| 106B ->109B | -0.23801 |
| 106B ->111B | 0.80070  |
| 107B ->111B | -0.21819 |

Excited State 30: 2.272-A 4.7336 eV 261.93 nm f=0.0067 <S\*\*2>=1.041

|             |          |
|-------------|----------|
| 103A ->110A | -0.17773 |
| 105A ->110A | -0.46759 |
| 106A ->109A | -0.15858 |
| 108A ->112A | -0.11888 |
| 103B ->109B | -0.23415 |
| 105B ->109B | -0.43740 |
| 106B ->110B | 0.47432  |
| 106B ->111B | 0.20294  |
| 107B ->110B | 0.26743  |

### **[Cu(II)LAsc], conformer 3**

Excitation energies and oscillator strengths:

Excited State 1: 2.024-A 1.6708 eV 742.07 nm f=0.0008 <S\*\*2>=0.774

|             |         |
|-------------|---------|
| 102B ->108B | 0.59646 |
| 105B ->108B | 0.24979 |
| 107B ->108B | 0.74872 |

This state for optimization and/or second-order correction.

Total Energy, E(TD-HF/TD-DFT) = -2842.85251361

Copying the excited state density for this state as the 1-particle RhoCI density.

Excited State 2: 2.025-A 1.7957 eV 690.44 nm f=0.0017 <S\*\*2>=0.775

|             |          |
|-------------|----------|
| 102B ->108B | -0.40235 |
| 105B ->108B | -0.17466 |
| 106B ->108B | 0.77605  |

107B ->108B      0.43756

Excited State 3: 2.025-A    1.8319 eV 676.81 nm f=0.0055 <S\*\*2>=0.776  
 102B ->108B      0.53955  
 105B ->108B      0.23229  
 106B ->108B      0.62573  
 107B ->108B      -0.49338

Excited State 4: 2.028-A    2.4726 eV 501.44 nm f=0.0001 <S\*\*2>=0.778  
 102B ->108B      -0.38049  
 105B ->108B      0.92074

Excited State 5: 2.029-A    2.6440 eV 468.92 nm f=0.0054 <S\*\*2>=0.779  
 104B ->108B      0.99053

Excited State 6: 2.027-A    2.6654 eV 465.15 nm f=0.0002 <S\*\*2>=0.778  
 103B ->108B      0.99386

Excited State 7: 2.238-A    3.2406 eV 382.59 nm f=0.0070 <S\*\*2>=1.002  
 102A ->109A      -0.15226  
 108A ->109A      0.32003  
 96B ->108B      0.17525  
 98B ->108B      -0.15226  
 99B ->108B      0.66401  
 100B ->108B      -0.50792  
 102B ->109B      0.22755

Excited State 8: 2.098-A    3.2785 eV 378.17 nm f=0.0679 <S\*\*2>=0.851  
 106A ->109A      -0.34936  
 107A ->109A      0.23335  
 108A ->109A      0.81087  
 94B ->108B      0.15108  
 99B ->108B      -0.23074  
 100B ->108B      0.18462

Excited State 9: 2.828-A    3.4854 eV 355.72 nm f=0.0028 <S\*\*2>=1.750  
 106A ->109A      -0.14654  
 107A ->109A      0.92892  
 108A ->109A      -0.30632

Excited State 10: 2.858-A    3.5886 eV 345.49 nm f=0.0081 <S\*\*2>=1.792  
 106A ->109A      0.89044  
 107A ->109A      0.26212  
 108A ->109A      0.33715

Excited State 11: 3.443-A    3.7116 eV 334.05 nm f=0.0001 <S\*\*2>=2.713

|             |          |
|-------------|----------|
| 106A ->110A | 0.30777  |
| 107A ->110A | -0.27332 |
| 108A ->110A | 0.50887  |
| 106B ->110B | -0.32160 |
| 107B ->109B | -0.15269 |
| 107B ->110B | 0.55502  |

Excited State 12: 3.444-A 3.8316 eV 323.58 nm f=0.0001 <S\*\*2>=2.716

|             |          |
|-------------|----------|
| 106A ->110A | 0.27419  |
| 107A ->110A | 0.57704  |
| 108A ->110A | 0.14176  |
| 106B ->109B | 0.16156  |
| 106B ->110B | -0.56179 |
| 107B ->109B | 0.12380  |
| 107B ->110B | -0.32485 |

Excited State 13: 2.269-A 4.0285 eV 307.77 nm f=0.0003 <S\*\*2>=1.037

|             |          |
|-------------|----------|
| 102A ->109A | 0.16792  |
| 105A ->109A | 0.16268  |
| 106A ->110A | 0.13679  |
| 107A ->110A | 0.61250  |
| 106B ->109B | -0.19022 |
| 106B ->110B | 0.32526  |
| 107B ->109B | -0.46111 |
| 107B ->110B | 0.36055  |

Excited State 14: 2.772-A 4.0578 eV 305.55 nm f=0.0005 <S\*\*2>=1.670

|             |          |
|-------------|----------|
| 102A ->109A | 0.51627  |
| 105A ->109A | 0.55022  |
| 106A ->110A | -0.10572 |
| 107A ->110A | -0.25000 |
| 95B ->108B  | -0.22113 |
| 99B ->108B  | 0.13262  |
| 102B ->109B | -0.14737 |
| 106B ->109B | 0.18317  |
| 106B ->110B | -0.21235 |
| 107B ->109B | -0.28878 |
| 107B ->110B | -0.22258 |

Excited State 15: 2.787-A 4.0934 eV 302.89 nm f=0.0029 <S\*\*2>=1.691

|             |          |
|-------------|----------|
| 102A ->109A | 0.28249  |
| 105A ->109A | 0.42142  |
| 106A ->110A | 0.12343  |
| 108A ->110A | 0.17114  |
| 106B ->109B | -0.26480 |
| 106B ->110B | 0.18156  |

107B ->109B 0.74020  
107B ->110B 0.13850

Excited State 16: 2.614-A 4.1387 eV 299.57 nm f=0.0034 <S\*\*2>=1.458  
106A ->110A -0.12846  
107A ->110A 0.14361  
108A ->110A -0.29331  
106B ->109B 0.78731  
107B ->109B 0.23904  
107B ->110B 0.40071

Excited State 17: 2.239-A 4.2096 eV 294.52 nm f=0.0081 <S\*\*2>=1.003  
104A ->109A -0.10272  
105A ->110A 0.11703  
106A ->110A 0.22750  
108A ->110A 0.50587  
106B ->109B 0.42926  
106B ->110B 0.53590  
107B ->110B -0.34247

Excited State 18: 2.775-A 4.2370 eV 292.62 nm f=0.0001 <S\*\*2>=1.676  
102A ->109A -0.43495  
105A ->109A 0.63136  
95B ->108B 0.46663  
95B ->109B -0.11825  
97B ->108B 0.10456  
102B ->109B 0.22975  
107B ->109B -0.18279

Excited State 19: 2.335-A 4.3738 eV 283.47 nm f=0.0002 <S\*\*2>=1.113  
102A ->109A 0.54210  
103A ->109A 0.18896  
104A ->109A 0.20905  
105A ->109A -0.25306  
95B ->108B 0.61028  
95B ->109B -0.13509  
96B ->108B -0.13269  
97B ->108B 0.14427  
98B ->108B -0.17498  
100B ->108B -0.19366  
102B ->109B 0.16771

Excited State 20: 2.840-A 4.3992 eV 281.83 nm f=0.0018 <S\*\*2>=1.766  
102A ->109A -0.20831  
103A ->109A 0.33145  
104A ->109A 0.86967

|                   |          |           |           |          |              |
|-------------------|----------|-----------|-----------|----------|--------------|
| 95B ->108B        | -0.12906 |           |           |          |              |
| 101B ->108B       | 0.10762  |           |           |          |              |
| Excited State 21: | 2.845-A  | 4.4118 eV | 281.03 nm | f=0.0001 | <S**2>=1.773 |
| 102A ->109A       | -0.11527 |           |           |          |              |
| 103A ->109A       | 0.90232  |           |           |          |              |
| 104A ->109A       | -0.39748 |           |           |          |              |
| Excited State 22: | 3.437-A  | 4.4371 eV | 279.43 nm | f=0.0000 | <S**2>=2.703 |
| 105A ->110A       | 0.63879  |           |           |          |              |
| 105A ->115A       | 0.10259  |           |           |          |              |
| 102B ->110B       | 0.10097  |           |           |          |              |
| 105B ->109B       | 0.19250  |           |           |          |              |
| 105B ->110B       | -0.62731 |           |           |          |              |
| 105B ->115B       | -0.10784 |           |           |          |              |
| Excited State 23: | 2.047-A  | 4.4811 eV | 276.68 nm | f=0.0018 | <S**2>=0.797 |
| 101B ->108B       | 0.98122  |           |           |          |              |
| Excited State 24: | 2.696-A  | 4.5142 eV | 274.66 nm | f=0.0018 | <S**2>=1.567 |
| 103A ->110A       | -0.29114 |           |           |          |              |
| 104A ->110A       | -0.33400 |           |           |          |              |
| 106A ->110A       | 0.63546  |           |           |          |              |
| 107A ->110A       | -0.17313 |           |           |          |              |
| 108A ->110A       | -0.41830 |           |           |          |              |
| 104B ->110B       | 0.31306  |           |           |          |              |
| Excited State 25: | 2.035-A  | 4.5758 eV | 270.96 nm | f=0.0022 | <S**2>=0.785 |
| 94B ->108B        | 0.13358  |           |           |          |              |
| 95B ->108B        | 0.13469  |           |           |          |              |
| 98B ->108B        | -0.16254 |           |           |          |              |
| 99B ->108B        | 0.54589  |           |           |          |              |
| 100B ->108B       | 0.77740  |           |           |          |              |
| Excited State 26: | 3.452-A  | 4.5900 eV | 270.12 nm | f=0.0000 | <S**2>=2.728 |
| 103A ->110A       | 0.47282  |           |           |          |              |
| 104A ->110A       | -0.44387 |           |           |          |              |
| 103B ->109B       | -0.16437 |           |           |          |              |
| 103B ->110B       | 0.63326  |           |           |          |              |
| 103B ->115B       | 0.11293  |           |           |          |              |
| Excited State 27: | 2.104-A  | 4.6389 eV | 267.27 nm | f=0.0410 | <S**2>=0.857 |
| 106A ->109A       | 0.11820  |           |           |          |              |
| 106A ->122A       | 0.11905  |           |           |          |              |
| 108A ->109A       | -0.11144 |           |           |          |              |
| 108A ->122A       | -0.12388 |           |           |          |              |

94B ->108B 0.75653  
96B ->108B 0.41448  
97B ->108B 0.16716  
99B ->108B -0.14213  
100B ->108B -0.11649

Excited State 28: 2.909-A 4.6522 eV 266.51 nm f=0.0009 <S\*\*2>=1.865

103A ->110A -0.24034  
104A ->110A -0.23450  
105A ->110A -0.15961  
106A ->110A -0.41820  
107A ->110A 0.11673  
108A ->110A 0.27660  
103B ->110B -0.10262  
104B ->109B -0.19070  
104B ->110B 0.64329  
104B ->115B 0.10308  
105B ->109B 0.12076  
105B ->110B -0.15679

Excited State 29: 2.626-A 4.6857 eV 264.60 nm f=0.0022 <S\*\*2>=1.474

102A ->109A 0.12360  
105A ->110A -0.21380  
106A ->110A 0.10151  
95B ->108B -0.18494  
97B ->108B -0.15041  
98B ->108B 0.16873  
99B ->108B -0.14466  
102B ->109B 0.41623  
105B ->109B 0.77016

Excited State 30: 2.054-A 4.7551 eV 260.74 nm f=0.0013 <S\*\*2>=0.804

103A ->110A -0.14092  
105A ->110A 0.38522  
106A ->110A -0.14324  
95B ->108B 0.10948  
98B ->108B 0.73926  
99B ->108B 0.15202  
102B ->109B 0.15041  
105B ->110B 0.37794

**[Cu(II)LHAsc]<sup>+</sup>**

Excited State 1: 2.009-A 0.8135 eV 1524.17 nm f=0.0031 <S\*\*2>=0.759

85B ->108B 0.10397  
92B ->108B 0.16526  
93B ->108B 0.34975

95B ->108B 0.13350  
96B ->108B -0.12554  
97B ->108B 0.18261  
106B ->108B 0.83092  
107B ->108B 0.19056

This state for optimization and/or second-order correction.

Total Energy, E(TD-HF/TD-DFT) = -2843.02524431

Copying the excited state density for this state as the 1-particle RhoCI density.

Excited State 2: 2.009-A 1.4749 eV 840.63 nm f=0.0029 <S\*\*2>=0.759

84B ->108B 0.10090  
85B ->108B 0.14046  
87B ->108B 0.24844  
88B ->108B -0.20399  
89B ->108B 0.23946  
91B ->108B -0.13057  
92B ->108B 0.16194  
93B ->108B -0.19125  
97B ->108B -0.14140  
98B ->108B 0.29906  
100B ->108B -0.42193  
102B ->108B -0.10283  
105B ->108B 0.59164  
107B ->108B -0.13454

Excited State 3: 2.008-A 1.8832 eV 658.36 nm f=0.0026 <S\*\*2>=0.758

84B ->108B -0.17206  
89B ->108B 0.17081  
92B ->108B -0.34941  
93B ->108B 0.45283  
95B ->108B 0.14866  
96B ->108B 0.22604  
97B ->108B -0.29847  
98B ->108B 0.55824  
99B ->108B 0.16632  
105B ->108B -0.10380  
107B ->108B -0.11931

Excited State 4: 2.029-A 1.9063 eV 650.41 nm f=0.0786 <S\*\*2>=0.779

89B ->108B 0.16503  
93B ->108B 0.11002  
94B ->108B -0.20692  
95B ->108B 0.15609  
97B ->108B -0.47005  
98B ->108B -0.40364  
99B ->108B 0.11274

106B ->108B -0.11019  
107B ->108B 0.64622

Excited State 5: 2.037-A 2.0082 eV 617.40 nm f=0.0965 <S\*\*2>=0.788

93B ->108B -0.11196  
94B ->108B 0.15585  
95B ->108B -0.15046  
97B ->108B 0.38037  
98B ->108B 0.50590  
106B ->108B -0.13989  
107B ->108B 0.69032

Excited State 6: 2.178-A 3.3295 eV 372.38 nm f=0.0055 <S\*\*2>=0.936

108A ->109A -0.23773  
84B ->108B -0.20985  
85B ->108B -0.23088  
87B ->108B -0.30837  
88B ->108B 0.24216  
89B ->108B -0.24560  
91B ->108B 0.12606  
92B ->108B -0.19420  
93B ->108B 0.12526  
98B ->108B -0.16712  
102B ->108B 0.11257  
105B ->108B 0.64285  
107B ->109B -0.19077

Excited State 7: 3.149-A 3.3952 eV 365.17 nm f=0.0227 <S\*\*2>=2.228

106A ->109A -0.13564  
108A ->109A 0.67737  
84B ->108B -0.11323  
85B ->108B -0.10223  
105B ->108B 0.22969  
107B ->108B 0.10398  
107B ->109B 0.58197

Excited State 8: 2.030-A 3.8184 eV 324.70 nm f=0.0267 <S\*\*2>=0.780

84B ->108B 0.10607  
85B ->108B 0.14529  
87B ->108B 0.10219  
92B ->108B 0.18589  
93B ->108B 0.63706  
95B ->108B 0.21915  
96B ->108B -0.18236  
97B ->108B 0.28318  
102B ->108B 0.14307



105B ->108B 0.10514  
106B ->108B -0.50312

Excited State 9: 2.024-A 4.0076 eV 309.37 nm f=0.0344 <S\*\*2>=0.774

93B ->108B -0.12354  
99B ->108B 0.19886  
101B ->108B -0.14453  
102B ->108B 0.93158

Excited State 10: 2.038-A 4.4182 eV 280.62 nm f=0.0225 <S\*\*2>=0.789

97B ->108B 0.12917  
99B ->108B 0.90116  
101B ->108B -0.21262  
102B ->108B -0.19125  
107B ->109B -0.12825

Excited State 11: 2.405-A 4.9484 eV 250.55 nm f=0.0019 <S\*\*2>=1.196

101A ->109A -0.11585  
105A ->109A -0.27960  
84B ->108B 0.10822  
85B ->108B 0.10145  
87B ->108B 0.10713  
100B ->108B 0.73031  
100B ->109B 0.16477  
101B ->108B 0.16503  
104B ->108B -0.17690  
105B ->108B 0.29575  
105B ->109B 0.25440

Excited State 12: 3.177-A 5.0324 eV 246.37 nm f=0.0009 <S\*\*2>=2.273

101A ->109A 0.18987  
104A ->109A -0.10522  
105A ->109A 0.62048  
106A ->109A -0.22393  
107A ->109A -0.20487  
100B ->108B 0.37248  
100B ->109B -0.11505  
105B ->108B 0.19072  
105B ->109B -0.42922  
106B ->109B -0.11826

Excited State 13: 2.080-A 5.2578 eV 235.81 nm f=0.1888 <S\*\*2>=0.832

108A ->109A -0.60151  
105B ->109B -0.18989  
107B ->109B 0.71201

Excited State 14: 2.060-A 5.4278 eV 228.43 nm f=0.0013 <S\*\*2>=0.811

|             |          |
|-------------|----------|
| 105A ->109A | -0.11345 |
| 89B ->108B  | 0.17377  |
| 96B ->108B  | 0.10214  |
| 97B ->108B  | 0.11217  |
| 99B ->108B  | -0.15030 |
| 100B ->108B | 0.22808  |
| 101B ->108B | -0.56139 |
| 103B ->108B | -0.13897 |
| 104B ->108B | 0.65090  |
| 105B ->109B | -0.15951 |

Excited State 15: 2.062-A 5.4741 eV 226.49 nm f=0.0209 <S\*\*2>=0.813

|             |          |
|-------------|----------|
| 101A ->109A | 0.11759  |
| 105A ->109A | 0.45929  |
| 106A ->109A | -0.15686 |
| 107A ->109A | -0.16607 |
| 108A ->109A | -0.16931 |
| 100B ->109B | 0.17901  |
| 101B ->108B | -0.19286 |
| 104B ->108B | 0.11573  |
| 105B ->109B | 0.68323  |
| 106B ->109B | 0.20274  |
| 107B ->109B | 0.18763  |

Excited State 16: 2.177-A 5.6025 eV 221.30 nm f=0.0013 <S\*\*2>=0.935

|             |          |
|-------------|----------|
| 102A ->109A | -0.17212 |
| 84B ->108B  | 0.12697  |
| 89B ->108B  | -0.13515 |
| 96B ->108B  | -0.10195 |
| 99B ->108B  | 0.10779  |
| 101B ->108B | 0.56847  |
| 101B ->109B | 0.12568  |
| 102B ->108B | 0.11176  |
| 104B ->108B | 0.68204  |
| 104B ->109B | -0.12843 |

Excited State 17: 2.836-A 5.7532 eV 215.51 nm f=0.0088 <S\*\*2>=1.760

|             |          |
|-------------|----------|
| 99A ->109A  | -0.12069 |
| 102A ->109A | 0.42020  |
| 108A ->109A | -0.10786 |
| 84B ->108B  | -0.14852 |
| 89B ->108B  | 0.30690  |
| 95B ->108B  | -0.26658 |
| 96B ->109B  | 0.10474  |
| 97B ->108B  | 0.17082  |

98B ->108B -0.11527  
100B ->109B 0.11475  
101B ->108B 0.32058  
101B ->109B -0.41073  
103B ->108B 0.27806  
104B ->108B 0.10419

Excited State 18: 2.804-A 5.8098 eV 213.41 nm f=0.0007 <S\*\*2>=1.716

108A ->110A 0.86619  
108A ->111A 0.22519  
107B ->110B 0.25593

Excited State 19: 2.683-A 5.8589 eV 211.62 nm f=0.0049 <S\*\*2>=1.549

99A ->109A -0.11705  
102A ->109A 0.41148  
108A ->110A -0.21879  
84B ->108B 0.16244  
87B ->108B -0.10089  
89B ->108B -0.34596  
94B ->108B 0.14137  
95B ->108B 0.39555  
96B ->108B -0.10639  
96B ->109B 0.10549  
97B ->108B -0.19391  
98B ->108B 0.12917  
101B ->109B -0.35083  
103B ->108B -0.24703

Excited State 20: 2.603-A 5.9585 eV 208.08 nm f=0.0042 <S\*\*2>=1.444

108A ->110A -0.23905  
95B ->108B -0.14332  
107B ->110B 0.89320  
107B ->111B 0.14205  
107B ->116B 0.10878

Excited State 21: 2.053-A 5.9806 eV 207.31 nm f=0.0015 <S\*\*2>=0.804

89B ->108B 0.17675  
92B ->108B -0.30283  
93B ->108B -0.25760  
95B ->108B 0.64289  
96B ->108B -0.13058  
97B ->108B 0.23539  
103B ->108B 0.50998  
107B ->110B 0.10109

Excited State 22: 2.031-A 6.0108 eV 206.27 nm f=0.0011 <S\*\*2>=0.781

|             |          |
|-------------|----------|
| 92B ->108B  | 0.11021  |
| 94B ->108B  | 0.84634  |
| 96B ->108B  | 0.27510  |
| 97B ->108B  | -0.26364 |
| 103B ->108B | 0.27609  |

Excited State 23: 2.053-A 6.1428 eV 201.84 nm f=0.0035 <S\*\*2>=0.804

|             |          |
|-------------|----------|
| 84B ->108B  | 0.15275  |
| 86B ->108B  | -0.12447 |
| 89B ->108B  | -0.38280 |
| 93B ->108B  | 0.11055  |
| 94B ->108B  | -0.30146 |
| 95B ->108B  | -0.19654 |
| 97B ->108B  | -0.13731 |
| 98B ->108B  | 0.14369  |
| 100B ->108B | 0.15668  |
| 101B ->108B | -0.25469 |
| 103B ->108B | 0.67072  |

Excited State 24: 3.321-A 6.2671 eV 197.83 nm f=0.0002 <S\*\*2>=2.508

|             |          |
|-------------|----------|
| 101A ->109A | 0.58254  |
| 104A ->109A | -0.10362 |
| 105A ->109A | -0.13057 |
| 107A ->109A | 0.33535  |
| 90B ->108B  | -0.20220 |
| 92B ->108B  | 0.14634  |
| 100B ->109B | -0.42891 |
| 106B ->109B | 0.28877  |
| 106B ->110B | 0.10409  |

Excited State 25: 2.120-A 6.3116 eV 196.44 nm f=0.0016 <S\*\*2>=0.873

|             |          |
|-------------|----------|
| 101A ->109A | 0.15993  |
| 84B ->108B  | -0.20315 |
| 87B ->108B  | 0.12583  |
| 89B ->108B  | -0.14957 |
| 90B ->108B  | 0.91070  |

Excited State 26: 2.718-A 6.4661 eV 191.74 nm f=0.0005 <S\*\*2>=1.597

|             |          |
|-------------|----------|
| 101A ->109A | -0.40535 |
| 107A ->109A | -0.21506 |
| 107A ->110A | 0.16282  |
| 93B ->110B  | 0.10707  |
| 100B ->109B | -0.27624 |
| 106B ->109B | 0.38022  |
| 106B ->110B | 0.58913  |
| 106B ->116B | 0.10563  |

106B ->118B -0.11880

Excited State 27: 2.536-A 6.5126 eV 190.38 nm f=0.0002 <S\*\*2>=1.358

101A ->109A -0.24654

107A ->109A -0.20046

107A ->110A -0.23038

86B ->108B 0.11592

88B ->108B 0.45810

90B ->108B 0.11320

91B ->108B -0.11416

92B ->108B 0.26567

93B ->108B -0.12397

97B ->108B -0.12077

100B ->109B -0.32779

106B ->109B 0.12119

106B ->110B -0.43733

Excited State 28: 2.272-A 6.5843 eV 188.30 nm f=0.0022 <S\*\*2>=1.041

101A ->109A 0.13184

107A ->109A 0.11613

107A ->110A 0.13733

84B ->108B 0.14894

85B ->108B 0.11035

88B ->108B 0.73420

89B ->108B 0.14926

92B ->108B 0.10184

94B ->108B -0.10560

100B ->109B 0.32059

106B ->109B -0.20110

106B ->110B 0.28566

Excited State 29: 2.049-A 6.6238 eV 187.18 nm f=0.0044 <S\*\*2>=0.799

87B ->108B 0.81722

88B ->108B 0.18603

89B ->108B -0.30498

90B ->108B -0.21466

92B ->108B -0.27711

106B ->109B 0.11371

Excited State 30: 2.147-A 6.7074 eV 184.85 nm f=0.0044 <S\*\*2>=0.902

75B ->108B 0.11577

84B ->108B -0.27136

85B ->108B -0.23418

86B ->108B 0.61131

88B ->108B -0.18586

89B ->108B -0.17383

|             |          |
|-------------|----------|
| 91B ->108B  | -0.12183 |
| 92B ->108B  | 0.40670  |
| 95B ->108B  | 0.12554  |
| 96B ->108B  | -0.16017 |
| 97B ->108B  | -0.12184 |
| 100B ->109B | 0.17723  |
| 106B ->109B | -0.21458 |
| 106B ->110B | 0.12368  |

**[Cu(II)LDHA]<sup>2+</sup>**

Excitation energies and oscillator strengths:

Excited State 1: 2.002-A 0.5597 eV 2215.33 nm f=0.0015 <S\*\*2>=0.752

|             |          |
|-------------|----------|
| 92B ->108B  | -0.26035 |
| 98B ->108B  | -0.13993 |
| 99B ->108B  | -0.11025 |
| 106B ->108B | 0.92616  |

This state for optimization and/or second-order correction.

Total Energy, E(TD-HF/TD-DFT) = -2842.53931966

Copying the excited state density for this state as the 1-particle RhoCI density.

Excited State 2: 3.368-A 1.1111 eV 1115.84 nm f=0.0034 <S\*\*2>=2.586

|             |          |
|-------------|----------|
| 103A ->108A | -0.19299 |
| 107A ->108A | -0.44243 |
| 103B ->107B | 0.24310  |
| 106B ->107B | 0.82809  |

Excited State 3: 2.287-A 1.3852 eV 895.07 nm f=0.0230 <S\*\*2>=1.057

|             |         |
|-------------|---------|
| 103A ->108A | 0.33220 |
| 106A ->108A | 0.12891 |
| 107A ->108A | 0.75751 |
| 106B ->107B | 0.52889 |

Excited State 4: 3.352-A 1.5672 eV 791.14 nm f=0.0008 <S\*\*2>=2.558

|             |          |
|-------------|----------|
| 103A ->108A | -0.45015 |
| 106A ->108A | -0.21490 |
| 107A ->108A | 0.43126  |
| 102B ->107B | -0.14321 |
| 103B ->107B | 0.62441  |
| 105B ->107B | 0.32559  |
| 106B ->107B | -0.12791 |

Excited State 5: 2.037-A 1.8327 eV 676.51 nm f=0.0027 <S\*\*2>=0.787

|             |         |
|-------------|---------|
| 103A ->108A | 0.37732 |
| 105A ->108A | 0.27851 |
| 106A ->108A | 0.60425 |

107A ->108A -0.15326  
103B ->107B 0.31578  
105B ->107B 0.51579

Excited State 6: 2.279-A 1.8709 eV 662.69 nm f=0.0002 <S\*\*2>=1.048

104A ->108A 0.15345  
105A ->108A 0.89277  
106A ->108A -0.37833

Excited State 7: 3.397-A 1.9342 eV 641.00 nm f=0.0000 <S\*\*2>=2.636

103A ->108A 0.28852  
105A ->108A -0.23089  
106A ->108A -0.52227  
103B ->107B -0.29381  
105B ->107B 0.69557

Excited State 8: 2.007-A 2.0041 eV 618.66 nm f=0.0019 <S\*\*2>=0.757

105A ->108A -0.10051  
94B ->108B 0.75836  
96B ->108B 0.49414  
97B ->108B 0.18807  
98B ->108B 0.10786  
100B ->108B 0.12272  
103B ->108B -0.19454

Excited State 9: 2.018-A 2.0359 eV 608.99 nm f=0.0029 <S\*\*2>=0.768

103A ->108A 0.59737  
106A ->108A -0.36400  
107A ->108A -0.10711  
93B ->108B 0.20261  
95B ->108B 0.10137  
103B ->107B 0.51912  
105B ->107B -0.34596

Excited State 10: 2.009-A 2.0572 eV 602.68 nm f=0.0006 <S\*\*2>=0.760

103A ->108A -0.17419  
105A ->108A 0.12579  
86B ->108B 0.17668  
91B ->108B 0.32020  
93B ->108B 0.70026  
94B ->108B 0.23518  
95B ->108B 0.33388  
98B ->108B -0.14518  
101B ->108B 0.11816  
103B ->107B -0.13727  
103B ->108B 0.20283

Excited State 11: 3.436-A 2.1330 eV 581.26 nm f=0.0000 <S\*\*2>=2.701  
104A ->108A 0.78852  
104B ->107B -0.59710

Excited State 12: 2.043-A 2.1467 eV 577.54 nm f=0.0012 <S\*\*2>=0.794  
104A ->108A 0.59029  
104B ->107B 0.79456

Excited State 13: 2.004-A 2.1817 eV 568.29 nm f=0.0000 <S\*\*2>=0.754  
86B ->108B 0.76948  
87B ->108B -0.13192  
88B ->108B 0.13500  
90B ->108B -0.19393  
91B ->108B -0.18173  
92B ->108B 0.32939  
93B ->108B -0.21956  
94B ->108B 0.10933  
98B ->108B -0.12560  
99B ->108B -0.14086  
103B ->108B 0.18404

Excited State 14: 2.007-A 2.6183 eV 473.54 nm f=0.0031 <S\*\*2>=0.757  
86B ->108B -0.13959  
103B ->108B 0.16329  
105B ->108B 0.96461

Excited State 15: 2.007-A 2.7718 eV 447.30 nm f=0.0008 <S\*\*2>=0.757  
103B ->108B -0.10079  
104B ->108B 0.98999

Excited State 16: 2.008-A 2.8090 eV 441.38 nm f=0.0326 <S\*\*2>=0.758  
86B ->108B -0.13602  
92B ->108B 0.18520  
96B ->108B 0.10894  
98B ->108B 0.16372  
99B ->108B 0.13467  
102B ->108B 0.57320  
103B ->108B 0.66390  
104B ->108B 0.13334  
105B ->108B -0.20518  
106B ->108B 0.17683

Excited State 17: 3.462-A 2.8309 eV 437.96 nm f=0.0000 <S\*\*2>=2.746  
99A ->108A 0.17485  
100A ->108A -0.16211



|             |          |
|-------------|----------|
| 101A ->108A | -0.58157 |
| 102A ->108A | -0.29392 |
| 98B ->107B  | -0.17293 |
| 99B ->107B  | 0.13307  |
| 100B ->107B | -0.17059 |
| 101B ->107B | 0.61321  |
| 102B ->107B | 0.13629  |

Excited State 18: 2.987-A 2.9635 eV 418.37 nm f=0.0019 <S\*\*2>=1.980

|             |          |
|-------------|----------|
| 101A ->108A | 0.13363  |
| 99B ->107B  | -0.10329 |
| 102B ->107B | 0.93128  |
| 103B ->107B | 0.17290  |

Excited State 19: 2.008-A 2.9890 eV 414.81 nm f=0.0058 <S\*\*2>=0.758

|             |          |
|-------------|----------|
| 86B ->108B  | -0.11706 |
| 88B ->108B  | -0.12730 |
| 90B ->108B  | 0.12839  |
| 92B ->108B  | -0.41060 |
| 93B ->108B  | -0.25589 |
| 94B ->108B  | 0.16716  |
| 97B ->108B  | 0.10047  |
| 98B ->108B  | -0.21218 |
| 99B ->108B  | -0.18401 |
| 102B ->108B | -0.40959 |
| 103B ->108B | 0.57687  |
| 105B ->108B | -0.10341 |
| 106B ->108B | -0.25992 |

Excited State 20: 3.112-A 3.1553 eV 392.93 nm f=0.0006 <S\*\*2>=2.170

|             |          |
|-------------|----------|
| 96A ->108A  | 0.24893  |
| 99A ->108A  | 0.14164  |
| 100A ->108A | 0.15214  |
| 101A ->108A | 0.15721  |
| 102A ->108A | -0.21934 |
| 103A ->109A | -0.10144 |
| 92B ->107B  | 0.11799  |
| 94B ->107B  | 0.11729  |
| 95B ->107B  | 0.15243  |
| 98B ->107B  | -0.15593 |
| 99B ->107B  | -0.18869 |
| 100B ->107B | 0.71527  |
| 101B ->107B | 0.26521  |
| 102B ->107B | -0.20884 |
| 103B ->109B | 0.10297  |

Excited State 21: 2.546-A 3.2481 eV 381.71 nm f=0.0062 <S\*\*2>=1.371

|             |          |
|-------------|----------|
| 96A ->108A  | -0.25196 |
| 99A ->108A  | -0.15075 |
| 100A ->108A | -0.10580 |
| 102A ->108A | 0.73316  |
| 100B ->107B | 0.29140  |
| 101B ->107B | 0.46509  |

Excited State 22: 2.193-A 3.3148 eV 374.04 nm f=0.0133 <S\*\*2>=0.952

|             |          |
|-------------|----------|
| 101A ->108A | 0.68528  |
| 98B ->107B  | -0.10411 |
| 100B ->107B | -0.48485 |
| 101B ->107B | 0.48305  |

Excited State 23: 2.067-A 3.3862 eV 366.14 nm f=0.0425 <S\*\*2>=0.819

|             |          |
|-------------|----------|
| 102A ->108A | 0.10016  |
| 86B ->108B  | 0.18206  |
| 88B ->108B  | -0.10361 |
| 92B ->108B  | -0.45214 |
| 93B ->108B  | -0.13204 |
| 94B ->108B  | 0.11081  |
| 98B ->108B  | -0.23891 |
| 99B ->108B  | -0.19161 |
| 102B ->108B | 0.66541  |
| 103B ->108B | -0.22591 |
| 106B ->108B | -0.19750 |

Excited State 24: 3.184-A 3.4087 eV 363.73 nm f=0.0021 <S\*\*2>=2.285

|             |          |
|-------------|----------|
| 96A ->108A  | 0.32802  |
| 98A ->108A  | -0.10124 |
| 99A ->108A  | 0.20270  |
| 100A ->108A | 0.18372  |
| 101A ->108A | -0.26159 |
| 102A ->108A | 0.51195  |
| 92B ->107B  | 0.12170  |
| 92B ->108B  | 0.10054  |
| 95B ->107B  | 0.23708  |
| 96B ->107B  | -0.14649 |
| 98B ->107B  | -0.29338 |
| 99B ->107B  | -0.30097 |
| 100B ->107B | -0.26857 |
| 101B ->107B | -0.10931 |
| 102B ->108B | -0.12894 |

Excited State 25: 2.104-A 3.6182 eV 342.66 nm f=0.0372 <S\*\*2>=0.857

|            |         |
|------------|---------|
| 96A ->108A | 0.39287 |
|------------|---------|

|             |          |
|-------------|----------|
| 98A ->108A  | -0.14669 |
| 99A ->108A  | 0.28014  |
| 100A ->108A | 0.26564  |
| 93B ->107B  | 0.15465  |
| 95B ->107B  | -0.21881 |
| 96B ->107B  | 0.14679  |
| 98B ->107B  | 0.36288  |
| 99B ->107B  | 0.36051  |
| 100B ->108B | 0.45978  |
| 101B ->108B | 0.17389  |

Excited State 26: 2.188-A 3.6970 eV 335.37 nm f=0.0757 <S\*\*2>=0.947

|             |          |
|-------------|----------|
| 96A ->108A  | -0.24779 |
| 99A ->108A  | -0.13078 |
| 100A ->108A | -0.13705 |
| 102A ->108A | -0.11537 |
| 92B ->107B  | 0.12285  |
| 93B ->107B  | 0.16375  |
| 94B ->107B  | -0.21866 |
| 94B ->108B  | -0.10012 |
| 95B ->107B  | 0.20383  |
| 96B ->107B  | -0.27868 |
| 97B ->107B  | -0.18872 |
| 98B ->107B  | -0.18952 |
| 99B ->107B  | -0.11043 |
| 100B ->108B | 0.65566  |
| 101B ->108B | 0.26455  |

Excited State 27: 3.324-A 3.7769 eV 328.27 nm f=0.0027 <S\*\*2>=2.512

|             |          |
|-------------|----------|
| 80A ->108A  | 0.10997  |
| 81A ->108A  | 0.10746  |
| 93A ->108A  | 0.10903  |
| 94A ->108A  | 0.12720  |
| 97A ->108A  | -0.11061 |
| 99A ->108A  | 0.40128  |
| 100A ->108A | -0.25605 |
| 101A ->108A | 0.18254  |
| 102A ->108A | 0.11492  |
| 79B ->107B  | -0.12979 |
| 93B ->107B  | -0.14631 |
| 94B ->107B  | -0.38635 |
| 95B ->107B  | -0.25139 |
| 96B ->107B  | -0.16253 |
| 97B ->107B  | -0.24010 |
| 98B ->107B  | -0.26245 |
| 99B ->107B  | 0.27468  |

100B ->107B 0.12751  
100B ->108B -0.14382  
101B ->107B -0.13394

Excited State 28: 3.176-A 3.8655 eV 320.75 nm f=0.0017 <S\*\*2>=2.271

94A ->108A -0.14296  
96A ->108A -0.11398  
98A ->108A 0.10095  
99A ->108A 0.26110  
100A ->108A -0.29830  
101A ->108A 0.14016  
92B ->107B 0.15497  
94B ->107B 0.56255  
96B ->107B 0.42863  
98B ->107B -0.30601  
99B ->107B 0.17621  
100B ->108B 0.14142  
101B ->107B -0.20240

Excited State 29: 2.798-A 3.9954 eV 310.32 nm f=0.0001 <S\*\*2>=1.707

77A ->108A -0.18942  
87A ->108A 0.37395  
88A ->108A -0.22838  
94A ->108A 0.60675  
95A ->108A 0.12545  
96A ->108A 0.21166  
100A ->108A -0.12078  
82B ->107B 0.15769  
85B ->107B 0.12731  
94B ->107B 0.19486  
96B ->107B 0.19401  
97B ->107B 0.15967  
101B ->108B 0.18285

Excited State 30: 3.112-A 4.0116 eV 309.06 nm f=0.0007 <S\*\*2>=2.171

90A ->108A -0.14197  
96A ->108A 0.17821  
97A ->108A 0.13295  
100A ->108A -0.15487  
91B ->107B 0.24084  
92B ->107B -0.21052  
93B ->107B 0.54017  
95B ->107B 0.39105  
96B ->107B -0.16902  
97B ->107B -0.17671  
99B ->107B 0.26572

101B ->108B -0.32513

**[Cu(I)LNO<sub>2</sub>], conformer 1**

Excitation energies and oscillator strengths:

Excited State 1: Singlet-A 3.1993 eV 387.54 nm f=0.0016 <S\*\*2>=0.000  
69 -> 75 0.23265  
71 -> 75 -0.12148  
72 -> 75 -0.32726  
73 -> 75 0.56224

This state for optimization and/or second-order correction.

Total Energy, E(TD-HF/TD-DFT) = -2364.69119569

Copying the excited state density for this state as the 1-particle RhoCI density.

Excited State 2: Singlet-A 3.5133 eV 352.90 nm f=0.0008 <S\*\*2>=0.000  
69 -> 75 -0.15758  
72 -> 75 0.54258  
73 -> 75 0.39703  
74 -> 75 -0.11137

Excited State 3: Singlet-A 3.5512 eV 349.13 nm f=0.0525 <S\*\*2>=0.000  
74 -> 75 0.68299

Excited State 4: Singlet-A 3.7381 eV 331.68 nm f=0.0007 <S\*\*2>=0.000  
69 -> 75 0.49371  
70 -> 75 0.20120  
71 -> 75 -0.32235  
72 -> 75 0.29009  
73 -> 75 -0.12746

Excited State 5: Singlet-A 4.1250 eV 300.56 nm f=0.0003 <S\*\*2>=0.000  
74 -> 76 0.68731

Excited State 6: Singlet-A 4.1574 eV 298.23 nm f=0.0011 <S\*\*2>=0.000  
70 -> 75 -0.35094  
71 -> 75 -0.22446  
73 -> 76 0.55220

Excited State 7: Singlet-A 4.1959 eV 295.49 nm f=0.0049 <S\*\*2>=0.000  
70 -> 75 0.48516  
71 -> 75 0.28640  
72 -> 76 0.13022  
73 -> 76 0.39179

Excited State 8: Singlet-A 4.2265 eV 293.35 nm f=0.0011 <S\*\*2>=0.000  
69 -> 75 0.41428

|               |          |           |           |           |          |              |
|---------------|----------|-----------|-----------|-----------|----------|--------------|
|               | 70 -> 75 | -0.29839  |           |           |          |              |
|               | 71 -> 75 | 0.48449   |           |           |          |              |
| Excited State | 9:       | Singlet-A | 4.6550 eV | 266.35 nm | f=0.0010 | <S**2>=0.000 |
|               | 72 -> 76 | 0.66127   |           |           |          |              |
|               | 73 -> 76 | -0.11732  |           |           |          |              |
| Excited State | 10:      | Singlet-A | 4.9139 eV | 252.32 nm | f=0.0002 | <S**2>=0.000 |
|               | 70 -> 76 | 0.55629   |           |           |          |              |
|               | 71 -> 76 | 0.39848   |           |           |          |              |
| Excited State | 11:      | Singlet-A | 4.9618 eV | 249.88 nm | f=0.0001 | <S**2>=0.000 |
|               | 69 -> 76 | 0.19134   |           |           |          |              |
|               | 70 -> 76 | -0.38290  |           |           |          |              |
|               | 71 -> 76 | 0.52389   |           |           |          |              |
| Excited State | 12:      | Singlet-A | 5.1881 eV | 238.98 nm | f=0.0001 | <S**2>=0.000 |
|               | 73 -> 77 | 0.14613   |           |           |          |              |
|               | 74 -> 77 | 0.61544   |           |           |          |              |
|               | 74 -> 78 | 0.28030   |           |           |          |              |
|               | 74 -> 79 | -0.10639  |           |           |          |              |
| Excited State | 13:      | Singlet-A | 5.2119 eV | 237.89 nm | f=0.0005 | <S**2>=0.000 |
|               | 73 -> 77 | -0.24785  |           |           |          |              |
|               | 73 -> 78 | -0.17086  |           |           |          |              |
|               | 74 -> 77 | -0.22152  |           |           |          |              |
|               | 74 -> 78 | 0.58400   |           |           |          |              |
| Excited State | 14:      | Singlet-A | 5.2249 eV | 237.30 nm | f=0.0012 | <S**2>=0.000 |
|               | 73 -> 77 | -0.45913  |           |           |          |              |
|               | 73 -> 78 | 0.50874   |           |           |          |              |
|               | 74 -> 77 | 0.13134   |           |           |          |              |
| Excited State | 15:      | Singlet-A | 5.2649 eV | 235.49 nm | f=0.0001 | <S**2>=0.000 |
|               | 73 -> 77 | 0.41204   |           |           |          |              |
|               | 73 -> 78 | 0.43455   |           |           |          |              |
|               | 73 -> 79 | -0.14042  |           |           |          |              |
|               | 74 -> 77 | -0.19086  |           |           |          |              |
|               | 74 -> 78 | 0.24634   |           |           |          |              |
| Excited State | 16:      | Singlet-A | 5.3532 eV | 231.61 nm | f=0.0051 | <S**2>=0.000 |
|               | 74 -> 79 | 0.68417   |           |           |          |              |
| Excited State | 17:      | Singlet-A | 5.3783 eV | 230.53 nm | f=0.0051 | <S**2>=0.000 |
|               | 73 -> 77 | 0.14745   |           |           |          |              |
|               | 73 -> 79 | 0.67092   |           |           |          |              |

|                   |           |           |           |          |              |
|-------------------|-----------|-----------|-----------|----------|--------------|
| Excited State 18: | Singlet-A | 5.4531 eV | 227.37 nm | f=0.0002 | <S**2>=0.000 |
| 64 -> 75          | -0.44398  |           |           |          |              |
| 67 -> 75          | 0.51393   |           |           |          |              |
| 72 -> 78          | 0.12293   |           |           |          |              |
| Excited State 19: | Singlet-A | 5.5571 eV | 223.11 nm | f=0.0056 | <S**2>=0.000 |
| 67 -> 75          | 0.11909   |           |           |          |              |
| 72 -> 77          | 0.47896   |           |           |          |              |
| 72 -> 78          | -0.47871  |           |           |          |              |
| Excited State 20: | Singlet-A | 5.5610 eV | 222.95 nm | f=0.0079 | <S**2>=0.000 |
| 72 -> 77          | 0.48779   |           |           |          |              |
| 72 -> 78          | 0.48374   |           |           |          |              |
| 72 -> 79          | -0.10527  |           |           |          |              |
| Excited State 21: | Singlet-A | 5.6605 eV | 219.04 nm | f=0.0113 | <S**2>=0.000 |
| 69 -> 76          | 0.65285   |           |           |          |              |
| 70 -> 76          | 0.10947   |           |           |          |              |
| 71 -> 76          | -0.17182  |           |           |          |              |
| Excited State 22: | Singlet-A | 5.7472 eV | 215.73 nm | f=0.0019 | <S**2>=0.000 |
| 72 -> 79          | 0.68179   |           |           |          |              |
| Excited State 23: | Singlet-A | 5.7685 eV | 214.93 nm | f=0.0032 | <S**2>=0.000 |
| 74 -> 80          | 0.67167   |           |           |          |              |
| 74 -> 83          | -0.12355  |           |           |          |              |
| Excited State 24: | Singlet-A | 5.7949 eV | 213.95 nm | f=0.0035 | <S**2>=0.000 |
| 73 -> 80          | 0.66712   |           |           |          |              |
| 73 -> 83          | -0.11385  |           |           |          |              |
| Excited State 25: | Singlet-A | 6.0370 eV | 205.37 nm | f=0.0002 | <S**2>=0.000 |
| 70 -> 77          | 0.49881   |           |           |          |              |
| 71 -> 77          | 0.27154   |           |           |          |              |
| 71 -> 78          | 0.37435   |           |           |          |              |
| Excited State 26: | Singlet-A | 6.0581 eV | 204.66 nm | f=0.0046 | <S**2>=0.000 |
| 69 -> 77          | 0.12047   |           |           |          |              |
| 70 -> 77          | -0.18640  |           |           |          |              |
| 70 -> 78          | -0.29000  |           |           |          |              |
| 71 -> 77          | 0.56644   |           |           |          |              |
| 71 -> 78          | -0.13420  |           |           |          |              |
| Excited State 27: | Singlet-A | 6.0663 eV | 204.38 nm | f=0.0054 | <S**2>=0.000 |
| 70 -> 77          | -0.41493  |           |           |          |              |

70 -> 78 0.33738  
71 -> 77 0.11453  
71 -> 78 0.41998

Excited State 28: Singlet-A 6.0881 eV 203.65 nm f=0.0131 <S\*\*2>=0.000  
69 -> 78 -0.13622  
70 -> 77 0.10932  
70 -> 78 0.51986  
71 -> 77 0.22619  
71 -> 78 -0.36015

Excited State 29: Singlet-A 6.2033 eV 199.87 nm f=0.0151 <S\*\*2>=0.000  
68 -> 75 -0.29101  
72 -> 80 0.61017

Excited State 30: Singlet-A 6.2435 eV 198.58 nm f=0.0009 <S\*\*2>=0.000  
70 -> 79 0.47286  
71 -> 79 0.47647

### **[Cu(I)LNO<sub>2</sub>], conformer 2**

Excitation energies and oscillator strengths:

Excited State 1: Singlet-A 3.1646 eV 391.78 nm f=0.0062 <S\*\*2>=0.000  
72 -> 75 0.27007  
74 -> 75 0.64354

This state for optimization and/or second-order correction.

Total Energy, E(TD-HF/TD-DFT) = -2364.69537862

Copying the excited state density for this state as the 1-particle RhoCI density.

Excited State 2: Singlet-A 3.6469 eV 339.97 nm f=0.0020 <S\*\*2>=0.000  
72 -> 75 0.20475  
73 -> 75 0.65662

Excited State 3: Singlet-A 4.1290 eV 300.27 nm f=0.0492 <S\*\*2>=0.000  
68 -> 75 -0.11005  
70 -> 75 -0.13610  
71 -> 75 0.29469  
72 -> 75 0.51216  
73 -> 75 -0.23466  
74 -> 75 -0.20847

Excited State 4: Singlet-A 4.3320 eV 286.20 nm f=0.0241 <S\*\*2>=0.000  
68 -> 75 -0.14654  
69 -> 75 -0.33007  
70 -> 75 0.11742  
71 -> 75 0.49375



|                   |           |           |           |          |              |  |
|-------------------|-----------|-----------|-----------|----------|--------------|--|
| 72 -> 75          | -0.27476  |           |           |          |              |  |
| 74 -> 75          | 0.14364   |           |           |          |              |  |
| Excited State 5:  | Singlet-A | 4.5279 eV | 273.82 nm | f=0.0138 | <S**2>=0.000 |  |
| 69 -> 75          | 0.18203   |           |           |          |              |  |
| 70 -> 75          | 0.65373   |           |           |          |              |  |
| 72 -> 75          | 0.10648   |           |           |          |              |  |
| 74 -> 76          | 0.11431   |           |           |          |              |  |
| Excited State 6:  | Singlet-A | 4.6104 eV | 268.92 nm | f=0.0062 | <S**2>=0.000 |  |
| 69 -> 75          | -0.32641  |           |           |          |              |  |
| 71 -> 75          | -0.17468  |           |           |          |              |  |
| 72 -> 76          | -0.10259  |           |           |          |              |  |
| 74 -> 76          | 0.57895   |           |           |          |              |  |
| Excited State 7:  | Singlet-A | 4.7044 eV | 263.55 nm | f=0.0113 | <S**2>=0.000 |  |
| 68 -> 75          | 0.29716   |           |           |          |              |  |
| 69 -> 75          | 0.37402   |           |           |          |              |  |
| 70 -> 75          | -0.15102  |           |           |          |              |  |
| 71 -> 75          | 0.33445   |           |           |          |              |  |
| 73 -> 76          | -0.16723  |           |           |          |              |  |
| 74 -> 76          | 0.27438   |           |           |          |              |  |
| Excited State 8:  | Singlet-A | 4.7773 eV | 259.53 nm | f=0.0033 | <S**2>=0.000 |  |
| 68 -> 75          | 0.55013   |           |           |          |              |  |
| 69 -> 75          | -0.23197  |           |           |          |              |  |
| 72 -> 76          | 0.13828   |           |           |          |              |  |
| 73 -> 76          | 0.29971   |           |           |          |              |  |
| Excited State 9:  | Singlet-A | 4.7870 eV | 259.00 nm | f=0.0038 | <S**2>=0.000 |  |
| 68 -> 75          | -0.19519  |           |           |          |              |  |
| 69 -> 75          | 0.15659   |           |           |          |              |  |
| 72 -> 76          | -0.14395  |           |           |          |              |  |
| 73 -> 76          | 0.59322   |           |           |          |              |  |
| 74 -> 76          | 0.15636   |           |           |          |              |  |
| Excited State 10: | Singlet-A | 5.1018 eV | 243.02 nm | f=0.0025 | <S**2>=0.000 |  |
| 68 -> 75          | -0.13319  |           |           |          |              |  |
| 72 -> 76          | 0.64693   |           |           |          |              |  |
| 74 -> 76          | 0.17027   |           |           |          |              |  |
| Excited State 11: | Singlet-A | 5.4568 eV | 227.21 nm | f=0.0084 | <S**2>=0.000 |  |
| 74 -> 77          | 0.55450   |           |           |          |              |  |
| 74 -> 78          | -0.41375  |           |           |          |              |  |
| Excited State 12: | Singlet-A | 5.5009 eV | 225.39 nm | f=0.0041 | <S**2>=0.000 |  |

|                   |           |           |           |          |              |
|-------------------|-----------|-----------|-----------|----------|--------------|
| 74 -> 77          | 0.39693   |           |           |          |              |
| 74 -> 78          | 0.54020   |           |           |          |              |
| 74 -> 79          | -0.18908  |           |           |          |              |
| Excited State 13: | Singlet-A | 5.6169 eV | 220.74 nm | f=0.0034 | <S**2>=0.000 |
| 70 -> 76          | 0.10762   |           |           |          |              |
| 74 -> 77          | 0.12799   |           |           |          |              |
| 74 -> 78          | 0.12952   |           |           |          |              |
| 74 -> 79          | 0.66151   |           |           |          |              |
| Excited State 14: | Singlet-A | 5.6307 eV | 220.19 nm | f=0.0035 | <S**2>=0.000 |
| 71 -> 76          | 0.66070   |           |           |          |              |
| Excited State 15: | Singlet-A | 5.6384 eV | 219.89 nm | f=0.0008 | <S**2>=0.000 |
| 70 -> 76          | 0.67034   |           |           |          |              |
| 74 -> 79          | -0.10077  |           |           |          |              |
| Excited State 16: | Singlet-A | 5.7111 eV | 217.09 nm | f=0.0007 | <S**2>=0.000 |
| 73 -> 77          | 0.68460   |           |           |          |              |
| Excited State 17: | Singlet-A | 5.7312 eV | 216.33 nm | f=0.0007 | <S**2>=0.000 |
| 73 -> 78          | 0.68958   |           |           |          |              |
| Excited State 18: | Singlet-A | 5.8474 eV | 212.03 nm | f=0.0032 | <S**2>=0.000 |
| 73 -> 79          | 0.69480   |           |           |          |              |
| Excited State 19: | Singlet-A | 5.9972 eV | 206.74 nm | f=0.0020 | <S**2>=0.000 |
| 72 -> 77          | 0.51152   |           |           |          |              |
| 72 -> 78          | -0.46517  |           |           |          |              |
| Excited State 20: | Singlet-A | 6.0351 eV | 205.44 nm | f=0.0069 | <S**2>=0.000 |
| 72 -> 77          | 0.45360   |           |           |          |              |
| 72 -> 78          | 0.49311   |           |           |          |              |
| 72 -> 79          | -0.15057  |           |           |          |              |
| Excited State 21: | Singlet-A | 6.1020 eV | 203.19 nm | f=0.0027 | <S**2>=0.000 |
| 72 -> 80          | -0.12364  |           |           |          |              |
| 74 -> 80          | 0.66677   |           |           |          |              |
| Excited State 22: | Singlet-A | 6.1805 eV | 200.61 nm | f=0.0032 | <S**2>=0.000 |
| 72 -> 78          | 0.10503   |           |           |          |              |
| 72 -> 79          | 0.67475   |           |           |          |              |
| Excited State 23: | Singlet-A | 6.2919 eV | 197.05 nm | f=0.0055 | <S**2>=0.000 |
| 66 -> 75          | 0.16062   |           |           |          |              |
| 73 -> 80          | 0.63876   |           |           |          |              |

|                   |           |           |           |          |              |
|-------------------|-----------|-----------|-----------|----------|--------------|
| 73 -> 83          | -0.13932  |           |           |          |              |
| Excited State 24: | Singlet-A | 6.3176 eV | 196.25 nm | f=0.0008 | <S**2>=0.000 |
| 65 -> 75          | -0.34599  |           |           |          |              |
| 66 -> 75          | 0.57739   |           |           |          |              |
| 73 -> 80          | -0.16296  |           |           |          |              |
| Excited State 25: | Singlet-A | 6.3624 eV | 194.87 nm | f=0.0024 | <S**2>=0.000 |
| 64 -> 75          | 0.12287   |           |           |          |              |
| 65 -> 75          | -0.31653  |           |           |          |              |
| 66 -> 75          | -0.19044  |           |           |          |              |
| 68 -> 76          | -0.19064  |           |           |          |              |
| 69 -> 76          | 0.51068   |           |           |          |              |
| 74 -> 83          | 0.10650   |           |           |          |              |
| Excited State 26: | Singlet-A | 6.4076 eV | 193.49 nm | f=0.0051 | <S**2>=0.000 |
| 65 -> 75          | 0.21946   |           |           |          |              |
| 66 -> 75          | 0.12700   |           |           |          |              |
| 67 -> 75          | 0.10550   |           |           |          |              |
| 68 -> 76          | 0.47316   |           |           |          |              |
| 69 -> 76          | 0.38560   |           |           |          |              |
| Excited State 27: | Singlet-A | 6.5486 eV | 189.33 nm | f=0.0039 | <S**2>=0.000 |
| 65 -> 75          | 0.27688   |           |           |          |              |
| 66 -> 75          | 0.14761   |           |           |          |              |
| 68 -> 76          | -0.17719  |           |           |          |              |
| 72 -> 80          | 0.36338   |           |           |          |              |
| 74 -> 81          | -0.10310  |           |           |          |              |
| 74 -> 83          | 0.37780   |           |           |          |              |
| 74 -> 86          | -0.13954  |           |           |          |              |
| Excited State 28: | Singlet-A | 6.5768 eV | 188.52 nm | f=0.0062 | <S**2>=0.000 |
| 64 -> 75          | 0.18915   |           |           |          |              |
| 65 -> 75          | 0.32550   |           |           |          |              |
| 66 -> 75          | 0.20703   |           |           |          |              |
| 68 -> 76          | -0.30985  |           |           |          |              |
| 69 -> 76          | 0.15515   |           |           |          |              |
| 74 -> 80          | -0.13164  |           |           |          |              |
| 74 -> 81          | 0.13733   |           |           |          |              |
| 74 -> 83          | -0.29676  |           |           |          |              |
| Excited State 29: | Singlet-A | 6.6337 eV | 186.90 nm | f=0.0017 | <S**2>=0.000 |
| 70 -> 77          | -0.39033  |           |           |          |              |
| 70 -> 78          | 0.45541   |           |           |          |              |
| 71 -> 77          | -0.18788  |           |           |          |              |
| 72 -> 80          | -0.14142  |           |           |          |              |

74 -> 81 -0.22176

Excited State 30: Singlet-A 6.6423 eV 186.66 nm f=0.0069 <S\*\*2>=0.000  
70 -> 77 -0.26363  
70 -> 78 0.20074  
71 -> 77 0.10256  
71 -> 78 -0.19819  
72 -> 80 0.31283  
74 -> 81 0.44188

**[Cu(II)LNO<sub>2</sub>]<sup>+</sup>, conformer 1**

Excitation energies and oscillator strengths:

Excited State 1: 2.006-A 0.8305 eV 1492.95 nm f=0.0043 <S\*\*2>=0.756  
63B -> 74B 0.10818  
65B -> 74B 0.16504  
66B -> 74B 0.29718  
72B -> 74B 0.92075

This state for optimization and/or second-order correction.

Total Energy, E(TD-HF/TD-DFT) = -2364.61652613

Copying the excited state density for this state as the 1-particle RhoCI density.

Excited State 2: 2.023-A 1.4810 eV 837.18 nm f=0.0201 <S\*\*2>=0.773  
63B -> 74B 0.16677  
70B -> 74B 0.12939  
73B -> 74B 0.95382

Excited State 3: 2.008-A 1.8697 eV 663.13 nm f=0.0004 <S\*\*2>=0.758  
61B -> 74B 0.36960  
62B -> 74B 0.46409  
64B -> 74B -0.12912  
65B -> 74B 0.17443  
70B -> 74B 0.63012  
71B -> 74B -0.35827  
73B -> 74B -0.19353

Excited State 4: 2.002-A 2.1153 eV 586.12 nm f=0.0010 <S\*\*2>=0.752  
63B -> 74B -0.10128  
68B -> 74B 0.97638

Excited State 5: 2.121-A 2.2108 eV 560.81 nm f=0.0001 <S\*\*2>=0.875  
74A -> 75A 0.17024  
61B -> 74B 0.11653  
62B -> 74B -0.12560  
63B -> 74B 0.70788  
65B -> 74B -0.48406

67B -> 74B 0.14654  
70B -> 74B -0.10493  
71B -> 74B -0.26504  
73B -> 74B -0.17468  
73B -> 75B -0.18008

Excited State 6: 3.355-A 2.3028 eV 538.40 nm f=0.0005 <S\*\*2>=2.564

73A -> 75A -0.10914  
74A -> 75A 0.68655  
63B -> 74B -0.17704  
65B -> 74B 0.11430  
73B -> 74B 0.11602  
73B -> 75B -0.67660

Excited State 7: 2.010-A 3.1980 eV 387.70 nm f=0.1072 <S\*\*2>=0.760

63B -> 74B 0.20225  
65B -> 74B -0.13695  
69B -> 74B -0.26741  
70B -> 74B 0.39350  
71B -> 74B 0.82522

Excited State 8: 2.018-A 3.4153 eV 363.02 nm f=0.0306 <S\*\*2>=0.768

74A -> 75A -0.10562  
63B -> 74B 0.15013  
64B -> 74B -0.19426  
65B -> 74B 0.39017  
66B -> 74B 0.55234  
69B -> 74B -0.51151  
70B -> 74B -0.25821  
72B -> 74B -0.29957  
73B -> 75B -0.10276

Excited State 9: 2.009-A 3.4322 eV 361.24 nm f=0.0203 <S\*\*2>=0.759

74A -> 75A 0.52205  
63B -> 74B 0.17997  
65B -> 74B 0.15810  
66B -> 74B 0.34145  
69B -> 74B 0.44270  
72B -> 74B -0.18080  
73B -> 75B 0.53012

Excited State 10: 2.012-A 3.4440 eV 360.00 nm f=0.0346 <S\*\*2>=0.762

74A -> 75A -0.43672  
62B -> 74B -0.14520  
63B -> 74B 0.16216  
66B -> 74B 0.29399

|                   |          |           |                                 |
|-------------------|----------|-----------|---------------------------------|
| 69B -> 74B        | 0.59599  |           |                                 |
| 70B -> 74B        | 0.20591  |           |                                 |
| 71B -> 74B        | 0.11251  |           |                                 |
| 72B -> 74B        | -0.14732 |           |                                 |
| 73B -> 75B        | -0.45822 |           |                                 |
| Excited State 11: | 2.021-A  | 3.7173 eV | 333.54 nm f=0.0084 <S**2>=0.771 |
| 59B -> 74B        | 0.12134  |           |                                 |
| 61B -> 74B        | -0.42839 |           |                                 |
| 62B -> 74B        | -0.52755 |           |                                 |
| 63B -> 74B        | -0.10126 |           |                                 |
| 66B -> 74B        | 0.15427  |           |                                 |
| 69B -> 74B        | -0.27176 |           |                                 |
| 70B -> 74B        | 0.54631  |           |                                 |
| 71B -> 74B        | -0.26661 |           |                                 |
| Excited State 12: | 3.414-A  | 4.0223 eV | 308.24 nm f=0.0004 <S**2>=2.663 |
| 70A -> 75A        | 0.38303  |           |                                 |
| 71A -> 75A        | -0.50555 |           |                                 |
| 72A -> 75A        | 0.14408  |           |                                 |
| 73A -> 75A        | 0.24152  |           |                                 |
| 62B -> 75B        | -0.10550 |           |                                 |
| 70B -> 75B        | 0.64929  |           |                                 |
| 72B -> 75B        | -0.23108 |           |                                 |
| 70B <- 75B        | 0.10307  |           |                                 |
| Excited State 13: | 2.017-A  | 4.4456 eV | 278.89 nm f=0.0025 <S**2>=0.767 |
| 63B -> 74B        | -0.11738 |           |                                 |
| 67B -> 74B        | 0.95299  |           |                                 |
| 69B -> 74B        | 0.13865  |           |                                 |
| Excited State 14: | 2.740-A  | 4.5447 eV | 272.81 nm f=0.0007 <S**2>=1.627 |
| 69A -> 75A        | -0.20900 |           |                                 |
| 70A -> 75A        | 0.29209  |           |                                 |
| 71A -> 75A        | 0.37460  |           |                                 |
| 72A -> 75A        | -0.13991 |           |                                 |
| 73A -> 75A        | 0.74606  |           |                                 |
| 74A -> 75A        | 0.12644  |           |                                 |
| 67B -> 75B        | -0.12192 |           |                                 |
| 71B -> 75B        | 0.29000  |           |                                 |
| Excited State 15: | 2.800-A  | 4.8453 eV | 255.88 nm f=0.0052 <S**2>=1.710 |
| 71A -> 75A        | -0.12590 |           |                                 |
| 70B -> 75B        | 0.16518  |           |                                 |
| 72B -> 75B        | 0.96359  |           |                                 |

Excited State 16: 2.014-A 4.9060 eV 252.72 nm f=0.0017 <S\*\*2>=0.764  
62B -> 74B -0.22273  
63B -> 74B 0.43754  
64B -> 74B -0.11266  
65B -> 74B 0.62489  
66B -> 74B -0.58468

Excited State 17: 2.014-A 4.9292 eV 251.53 nm f=0.0022 <S\*\*2>=0.764  
64B -> 74B 0.94374  
65B -> 74B 0.26955

Excited State 18: 2.886-A 5.1693 eV 239.85 nm f=0.0044 <S\*\*2>=1.833  
70A -> 75A -0.10126  
71A -> 75A 0.12117  
72A -> 75A 0.91823  
73A -> 75A 0.22775  
70B -> 75B -0.14522  
71B -> 75B -0.19623

Excited State 19: 2.811-A 5.1919 eV 238.80 nm f=0.0005 <S\*\*2>=1.725  
72A -> 75A 0.30995  
73A -> 75A -0.34413  
67B -> 75B -0.29750  
70B -> 75B 0.11058  
71B -> 75B 0.80309

Excited State 20: 2.015-A 5.2282 eV 237.14 nm f=0.0004 <S\*\*2>=0.765  
61B -> 74B 0.77654  
62B -> 74B -0.57176  
63B -> 74B -0.22023

Excited State 21: 2.062-A 5.5180 eV 224.69 nm f=0.0007 <S\*\*2>=0.813  
74A -> 76A 0.16820  
60B -> 74B 0.96351

Excited State 22: 3.149-A 5.5528 eV 223.28 nm f=0.0018 <S\*\*2>=2.228  
74A -> 76A 0.85608  
60B -> 74B -0.18275  
73B -> 76B -0.42846

Excited State 23: 2.027-A 5.5655 eV 222.77 nm f=0.0080 <S\*\*2>=0.777  
58B -> 74B -0.18950  
59B -> 74B 0.95012  
62B -> 74B 0.18946

Excited State 24: 2.019-A 5.6146 eV 220.82 nm f=0.0120 <S\*\*2>=0.769

|                   |          |           |           |          |              |
|-------------------|----------|-----------|-----------|----------|--------------|
| 58B -> 74B        | 0.96471  |           |           |          |              |
| 59B -> 74B        | 0.18926  |           |           |          |              |
| 60B -> 74B        | 0.11878  |           |           |          |              |
| Excited State 25: | 2.024-A  | 5.7340 eV | 216.22 nm | f=0.0007 | <S**2>=0.774 |
| 57B -> 74B        | 0.98032  |           |           |          |              |
| 73B -> 76B        | 0.10694  |           |           |          |              |
| Excited State 26: | 2.339-A  | 5.7504 eV | 215.61 nm | f=0.0033 | <S**2>=1.117 |
| 71A -> 75A        | -0.17074 |           |           |          |              |
| 73A -> 76A        | 0.25636  |           |           |          |              |
| 74A -> 76A        | 0.38079  |           |           |          |              |
| 57B -> 74B        | -0.11758 |           |           |          |              |
| 70B -> 75B        | -0.11829 |           |           |          |              |
| 73B -> 76B        | 0.82483  |           |           |          |              |
| Excited State 27: | 2.385-A  | 5.8073 eV | 213.50 nm | f=0.0026 | <S**2>=1.172 |
| 69A -> 75A        | -0.30126 |           |           |          |              |
| 70A -> 75A        | 0.65782  |           |           |          |              |
| 71A -> 75A        | 0.39002  |           |           |          |              |
| 73A -> 75A        | -0.41775 |           |           |          |              |
| 73A -> 76A        | 0.14131  |           |           |          |              |
| 71B -> 75B        | -0.27359 |           |           |          |              |
| 73B -> 76B        | 0.13733  |           |           |          |              |
| Excited State 28: | 3.257-A  | 5.8897 eV | 210.51 nm | f=0.0010 | <S**2>=2.402 |
| 72A -> 76A        | -0.34311 |           |           |          |              |
| 72B -> 76B        | 0.90286  |           |           |          |              |
| Excited State 29: | 2.212-A  | 6.0797 eV | 203.93 nm | f=0.0018 | <S**2>=0.974 |
| 73A -> 76A        | 0.92715  |           |           |          |              |
| 74A -> 76A        | -0.18105 |           |           |          |              |
| 72B -> 76B        | 0.10317  |           |           |          |              |
| 73B -> 76B        | -0.21400 |           |           |          |              |
| Excited State 30: | 2.300-A  | 6.1670 eV | 201.04 nm | f=0.0006 | <S**2>=1.073 |
| 72A -> 76A        | 0.91137  |           |           |          |              |
| 72B -> 76B        | 0.35251  |           |           |          |              |

**[Cu(II)LNO<sub>2</sub>]<sup>+</sup>, conformer 2**

Excitation energies and oscillator strengths:

|                  |          |           |            |          |              |
|------------------|----------|-----------|------------|----------|--------------|
| Excited State 1: | 2.003-A  | 1.0746 eV | 1153.79 nm | f=0.0015 | <S**2>=0.753 |
| 63B -> 74B       | -0.10886 |           |            |          |              |
| 64B -> 74B       | -0.10847 |           |            |          |              |
| 65B -> 74B       | -0.22487 |           |            |          |              |



66B -> 74B 0.15249  
68B -> 74B 0.13461  
70B -> 74B -0.13571  
73B -> 74B 0.91857

This state for optimization and/or second-order correction.

Total Energy, E(TD-HF/TD-DFT) = -2364.61051790

Copying the excited state density for this state as the 1-particle RhoCI density.

Excited State 2: 2.003-A 2.2054 eV 562.20 nm f=0.0105 <S\*\*2>=0.753

62B -> 74B 0.24370  
63B -> 74B 0.21046  
64B -> 74B 0.12542  
65B -> 74B 0.17531  
66B -> 74B 0.16641  
67B -> 74B -0.34274  
68B -> 74B 0.51570  
69B -> 74B 0.32554  
70B -> 74B -0.21913  
71B -> 74B -0.25044  
72B -> 74B -0.46034

Excited State 3: 2.003-A 2.2835 eV 542.95 nm f=0.0131 <S\*\*2>=0.753

64B -> 74B 0.12381  
65B -> 74B 0.22808  
66B -> 74B 0.38096  
67B -> 74B 0.58627  
69B -> 74B 0.44489  
70B -> 74B -0.23669  
71B -> 74B -0.24421  
72B -> 74B 0.32959

Excited State 4: 2.004-A 2.4194 eV 512.46 nm f=0.0023 <S\*\*2>=0.754

62B -> 74B 0.66791  
63B -> 74B 0.19674  
66B -> 74B -0.41409  
67B -> 74B 0.33659  
69B -> 74B -0.36907  
71B -> 74B -0.22964

Excited State 5: 2.826-A 2.6224 eV 472.78 nm f=0.0003 <S\*\*2>=1.747

72A -> 75A -0.39253  
73A -> 75A 0.17280  
74A -> 75A 0.80168  
72B -> 75B -0.38474

Excited State 6: 2.006-A 2.8814 eV 430.29 nm f=0.1054 <S\*\*2>=0.756

|            |          |
|------------|----------|
| 62B -> 74B | 0.13142  |
| 67B -> 74B | -0.43798 |
| 68B -> 74B | 0.32136  |
| 72B -> 74B | 0.79758  |

Excited State 7: 2.013-A 3.4786 eV 356.42 nm f=0.0106 <S\*\*2>=0.763

|            |          |
|------------|----------|
| 62B -> 74B | -0.12183 |
| 63B -> 74B | 0.14305  |
| 64B -> 74B | 0.14375  |
| 65B -> 74B | 0.30613  |
| 66B -> 74B | -0.27736 |
| 67B -> 74B | -0.17386 |
| 68B -> 74B | -0.21262 |
| 69B -> 74B | 0.19003  |
| 70B -> 74B | 0.54054  |
| 71B -> 74B | -0.49149 |
| 73B -> 74B | 0.31997  |

Excited State 8: 2.694-A 3.5967 eV 344.72 nm f=0.0032 <S\*\*2>=1.565

|            |          |
|------------|----------|
| 69A -> 75A | 0.22795  |
| 73A -> 75A | 0.23991  |
| 74A -> 75A | 0.34182  |
| 69B -> 74B | 0.12072  |
| 69B -> 75B | 0.19963  |
| 70B -> 75B | 0.16836  |
| 71B -> 74B | 0.15923  |
| 71B -> 75B | 0.14339  |
| 72B -> 75B | 0.68966  |
| 73B -> 75B | -0.36487 |

Excited State 9: 2.408-A 3.6327 eV 341.30 nm f=0.0345 <S\*\*2>=1.199

|            |          |
|------------|----------|
| 69A -> 75A | 0.23994  |
| 70A -> 75A | -0.22923 |
| 73A -> 75A | 0.14102  |
| 74A -> 75A | -0.19536 |
| 62B -> 74B | 0.24553  |
| 63B -> 74B | 0.19021  |
| 64B -> 74B | 0.16279  |
| 65B -> 74B | 0.19662  |
| 69B -> 74B | 0.24606  |
| 69B -> 75B | 0.17109  |
| 70B -> 74B | 0.24747  |
| 71B -> 74B | 0.57829  |
| 72B -> 75B | -0.32771 |
| 73B -> 74B | 0.12355  |

Excited State 10: 3.085-A 3.7479 eV 330.81 nm f=0.0139 <S\*\*2>=2.129  
69A -> 75A 0.33255  
70A -> 75A -0.28602  
73A -> 75A 0.22587  
74A -> 75A -0.13563  
62B -> 74B -0.12301  
63B -> 74B -0.10196  
65B -> 75B -0.13958  
66B -> 74B 0.12477  
66B -> 75B -0.15438  
68B -> 75B -0.10478  
69B -> 74B -0.21420  
69B -> 75B 0.46168  
71B -> 74B -0.40173  
72B -> 75B -0.24811  
73B -> 75B -0.33244

Excited State 11: 2.521-A 4.0085 eV 309.31 nm f=0.0085 <S\*\*2>=1.339  
70A -> 75A 0.24158  
72A -> 75A 0.15705  
73A -> 75A 0.45465  
74A -> 75A -0.11076  
65B -> 74B -0.15255  
66B -> 74B -0.45476  
67B -> 74B -0.11457  
68B -> 74B -0.21779  
69B -> 74B 0.34479  
70B -> 74B -0.41601  
72B -> 75B -0.20845  
73B -> 75B -0.15854

Excited State 12: 2.144-A 4.0648 eV 305.02 nm f=0.0218 <S\*\*2>=0.899  
69A -> 75A 0.13707  
73A -> 75A 0.49659  
62B -> 74B 0.13025  
65B -> 74B -0.19400  
66B -> 74B 0.16200  
70B -> 74B 0.17040  
71B -> 74B -0.15822  
72B -> 75B 0.19773  
73B -> 75B 0.71542

Excited State 13: 2.556-A 4.0971 eV 302.61 nm f=0.0217 <S\*\*2>=1.384  
70A -> 75A 0.20607  
73A -> 75A 0.19172  
62B -> 74B 0.17350

|            |          |
|------------|----------|
| 63B -> 74B | -0.12142 |
| 64B -> 74B | -0.13553 |
| 65B -> 74B | -0.33523 |
| 65B -> 75B | 0.10648  |
| 66B -> 74B | 0.22243  |
| 67B -> 74B | 0.15604  |
| 68B -> 74B | 0.22859  |
| 69B -> 74B | 0.14195  |
| 69B -> 75B | -0.23982 |
| 70B -> 74B | 0.53855  |
| 72B -> 75B | -0.17230 |
| 73B -> 74B | -0.11063 |
| 73B -> 75B | -0.37054 |

Excited State 14: 2.612-A 4.1421 eV 299.32 nm f=0.0035 <S\*\*2>=1.456

|            |          |
|------------|----------|
| 69A -> 75A | -0.18958 |
| 70A -> 75A | 0.11971  |
| 73A -> 75A | 0.53327  |
| 74A -> 75A | -0.13550 |
| 62B -> 74B | -0.11715 |
| 63B -> 74B | 0.15321  |
| 64B -> 74B | 0.17311  |
| 65B -> 74B | 0.44994  |
| 66B -> 74B | 0.24217  |
| 69B -> 74B | -0.45772 |
| 69B -> 75B | -0.20634 |
| 73B -> 75B | -0.13861 |

Excited State 15: 2.753-A 4.4087 eV 281.23 nm f=0.0013 <S\*\*2>=1.645

|            |          |
|------------|----------|
| 69A -> 75A | 0.32297  |
| 70A -> 75A | 0.27326  |
| 71A -> 75A | 0.13604  |
| 72A -> 75A | 0.65876  |
| 73A -> 75A | -0.12709 |
| 74A -> 75A | 0.26982  |
| 62B -> 74B | -0.10422 |
| 65B -> 74B | 0.18252  |
| 68B -> 74B | 0.11333  |
| 69B -> 74B | -0.18385 |
| 70B -> 75B | 0.12594  |
| 71B -> 75B | 0.23084  |
| 72B -> 75B | -0.20209 |

Excited State 16: 2.522-A 4.7749 eV 259.66 nm f=0.0059 <S\*\*2>=1.340

|            |          |
|------------|----------|
| 69A -> 75A | -0.12092 |
| 72A -> 75A | 0.23619  |

73A -> 75A 0.15599  
62B -> 74B -0.30950  
62B -> 75B -0.11905  
66B -> 74B -0.31891  
66B -> 75B -0.13168  
67B -> 74B 0.26241  
68B -> 74B 0.47434  
68B -> 75B 0.16145  
70B -> 75B -0.24231  
71B -> 75B -0.46230  
72B -> 75B 0.11520

Excited State 17: 2.523-A 4.8179 eV 257.34 nm f=0.0075 <S\*\*2>=1.341

72A -> 75A -0.38092  
74A -> 75A -0.19423  
62B -> 74B -0.25283  
66B -> 74B -0.24882  
66B -> 75B 0.11867  
67B -> 74B 0.22385  
67B -> 75B -0.13721  
68B -> 74B 0.39777  
68B -> 75B -0.11593  
69B -> 75B 0.16380  
70B -> 75B 0.29162  
71B -> 75B 0.49156  
73B -> 75B 0.16936

Excited State 18: 2.009-A 5.2825 eV 234.71 nm f=0.0009 <S\*\*2>=0.759

62B -> 74B -0.28733  
63B -> 74B 0.49443  
64B -> 74B 0.60860  
65B -> 74B -0.53005

Excited State 19: 2.036-A 5.3019 eV 233.85 nm f=0.0009 <S\*\*2>=0.786

69A -> 75A -0.14160  
70A -> 75A -0.14256  
71A -> 75A -0.12058  
72A -> 75A 0.10656  
62B -> 74B -0.11647  
63B -> 74B 0.69832  
64B -> 74B -0.62877

Excited State 20: 2.316-A 5.3149 eV 233.28 nm f=0.0005 <S\*\*2>=1.091

69A -> 75A 0.45106  
70A -> 75A 0.48436  
71A -> 75A 0.41292

|                   |          |           |           |          |              |
|-------------------|----------|-----------|-----------|----------|--------------|
| 72A -> 75A        | -0.35937 |           |           |          |              |
| 73A -> 75A        | -0.10269 |           |           |          |              |
| 74A -> 75A        | -0.15713 |           |           |          |              |
| 63B -> 74B        | 0.16819  |           |           |          |              |
| 64B -> 74B        | -0.23509 |           |           |          |              |
| 70B -> 75B        | -0.12603 |           |           |          |              |
| 71B -> 75B        | -0.28156 |           |           |          |              |
| Excited State 21: | 2.007-A  | 5.6015 eV | 221.34 nm | f=0.0006 | <S**2>=0.757 |
| 61B -> 74B        | 0.98266  |           |           |          |              |
| 62B -> 74B        | 0.10386  |           |           |          |              |
| Excited State 22: | 2.008-A  | 5.9191 eV | 209.46 nm | f=0.0028 | <S**2>=0.758 |
| 59B -> 74B        | 0.33833  |           |           |          |              |
| 60B -> 74B        | 0.92677  |           |           |          |              |
| Excited State 23: | 2.017-A  | 5.9499 eV | 208.38 nm | f=0.0054 | <S**2>=0.767 |
| 58B -> 74B        | -0.15021 |           |           |          |              |
| 59B -> 74B        | 0.91780  |           |           |          |              |
| 60B -> 74B        | -0.32662 |           |           |          |              |
| Excited State 24: | 3.179-A  | 5.9854 eV | 207.15 nm | f=0.0001 | <S**2>=2.276 |
| 71A -> 75A        | -0.25949 |           |           |          |              |
| 58B -> 74B        | 0.10364  |           |           |          |              |
| 68B -> 75B        | -0.12532 |           |           |          |              |
| 70B -> 75B        | 0.77634  |           |           |          |              |
| 71B -> 75B        | -0.49080 |           |           |          |              |
| 73B -> 76B        | -0.10342 |           |           |          |              |
| Excited State 25: | 2.031-A  | 5.9986 eV | 206.69 nm | f=0.0048 | <S**2>=0.781 |
| 74A -> 76A        | 0.14588  |           |           |          |              |
| 57B -> 74B        | 0.11459  |           |           |          |              |
| 58B -> 74B        | 0.95172  |           |           |          |              |
| 59B -> 74B        | 0.16204  |           |           |          |              |
| Excited State 26: | 2.409-A  | 6.0422 eV | 205.20 nm | f=0.0003 | <S**2>=1.201 |
| 69A -> 75A        | -0.22897 |           |           |          |              |
| 70A -> 75A        | -0.39112 |           |           |          |              |
| 71A -> 75A        | 0.80136  |           |           |          |              |
| 72A -> 75A        | 0.10615  |           |           |          |              |
| 68B -> 75B        | -0.13405 |           |           |          |              |
| 70B -> 75B        | 0.25955  |           |           |          |              |
| 71B -> 75B        | -0.14367 |           |           |          |              |
| Excited State 27: | 2.099-A  | 6.0791 eV | 203.95 nm | f=0.0002 | <S**2>=0.851 |
| 74A -> 76A        | -0.47095 |           |           |          |              |

|                   |          |           |                                 |
|-------------------|----------|-----------|---------------------------------|
| 57B -> 74B        | 0.85199  |           |                                 |
| Excited State 28: | 2.335-A  | 6.0863 eV | 203.71 nm f=0.0047 <S**2>=1.113 |
| 71A -> 75A        | -0.10020 |           |                                 |
| 74A -> 76A        | 0.76958  |           |                                 |
| 57B -> 74B        | 0.48276  |           |                                 |
| 58B -> 74B        | -0.18659 |           |                                 |
| 69B -> 75B        | -0.10500 |           |                                 |
| 73B -> 76B        | 0.21538  |           |                                 |
| Excited State 29: | 3.059-A  | 6.1695 eV | 200.96 nm f=0.0035 <S**2>=2.089 |
| 68A -> 75A        | 0.15948  |           |                                 |
| 65B -> 75B        | 0.12845  |           |                                 |
| 66B -> 75B        | 0.23439  |           |                                 |
| 67B -> 75B        | -0.24318 |           |                                 |
| 68B -> 75B        | 0.73912  |           |                                 |
| 69B -> 75B        | 0.31684  |           |                                 |
| 70B -> 75B        | 0.14800  |           |                                 |
| 72B -> 75B        | -0.12233 |           |                                 |
| 73B -> 76B        | 0.31198  |           |                                 |
| Excited State 30: | 3.156-A  | 6.2277 eV | 199.09 nm f=0.0016 <S**2>=2.240 |
| 71A -> 75A        | -0.12427 |           |                                 |
| 73A -> 76A        | -0.42450 |           |                                 |
| 74A -> 76A        | -0.21069 |           |                                 |
| 68B -> 75B        | -0.29892 |           |                                 |
| 73B -> 76B        | 0.76003  |           |                                 |

**Geometries (at  $\omega$ B97X-D/def2SVP level)**

**[Cu(I)L]<sup>+</sup>**

E = -2159.556594

|    |           |           |           |
|----|-----------|-----------|-----------|
| C  | 1.378462  | -1.099257 | 1.093671  |
| N  | 1.713247  | -0.057661 | 0.102478  |
| Cu | 0.015975  | 0.012599  | -1.181040 |
| N  | -0.790125 | 1.508469  | 0.101443  |
| C  | 0.264069  | 1.731374  | 1.110625  |
| C  | 1.660545  | 1.310171  | 0.641202  |
| C  | 0.316199  | -2.090295 | 0.606556  |
| N  | -0.894573 | -1.443062 | 0.078015  |
| C  | -1.628772 | -0.648078 | 1.082148  |
| C  | -1.956279 | 0.774705  | 0.617115  |
| C  | 2.977581  | -0.330449 | -0.577033 |
| C  | -1.175840 | 2.745609  | -0.573508 |
| C  | -1.763583 | -2.390448 | -0.616175 |

|   |           |           |           |
|---|-----------|-----------|-----------|
| H | 1.046010  | -0.621019 | 2.024452  |
| H | 2.278526  | -1.672391 | 1.369478  |
| H | 0.736732  | -2.702334 | -0.205902 |
| H | 0.075471  | -2.780773 | 1.438802  |
| H | -1.047619 | -0.613377 | 2.013057  |
| H | -2.574923 | -1.145219 | 1.351047  |
| H | -2.695387 | 0.728783  | -0.197201 |
| H | -2.435302 | 1.314953  | 1.457333  |
| H | 0.001731  | 1.197818  | 2.033739  |
| H | 0.307017  | 2.795333  | 1.394856  |
| H | 1.992208  | 1.986795  | -0.161047 |
| H | 2.366501  | 1.440274  | 1.485027  |
| H | -2.620250 | -1.856454 | -1.049399 |
| H | -1.212186 | -2.872309 | -1.435162 |
| H | -2.146346 | -3.176536 | 0.062323  |
| H | -0.284581 | 3.227590  | -0.997885 |
| H | -1.867765 | 2.521918  | -1.396996 |
| H | -1.666298 | 3.458950  | 0.115965  |
| H | 3.129712  | 0.394782  | -1.388118 |
| H | 3.840493  | -0.274135 | 0.113621  |
| H | 2.949793  | -1.335750 | -1.018954 |

**[Cu(I)L(H<sub>2</sub>O)]<sup>+</sup>**

E = -2235.936986

|    |           |           |          |
|----|-----------|-----------|----------|
| C  | -0.013207 | 0.018276  | 0.024023 |
| N  | -0.000509 | 0.002027  | 1.483152 |
| C  | 1.363249  | 0.002719  | 2.022125 |
| C  | 1.414228  | 0.280615  | 3.525820 |
| N  | 0.662846  | 1.485071  | 3.912443 |
| C  | 1.538662  | 2.630657  | 4.135906 |
| C  | -0.858818 | -1.060418 | 2.030893 |
| C  | -2.209003 | -0.541252 | 2.529006 |
| N  | -2.084311 | 0.596889  | 3.444238 |
| C  | -3.362735 | 1.259934  | 3.677032 |
| Cu | -0.746972 | 1.891630  | 2.294213 |
| O  | -1.167869 | 3.632182  | 1.382051 |
| C  | -1.384932 | 0.283830  | 4.700111 |
| C  | -0.267713 | 1.277261  | 5.026605 |
| H  | -0.331182 | -1.572254 | 2.846642 |
| H  | -1.045544 | -1.840455 | 1.273939 |
| H  | -2.805645 | -0.202406 | 1.667969 |
| H  | -2.763148 | -1.382324 | 2.992179 |
| H  | -0.976978 | -0.734452 | 4.647463 |
| H  | -2.091383 | 0.267715  | 5.546964 |
| H  | -0.712511 | 2.255853  | 5.265076 |
| H  | 0.257162  | 0.932753  | 5.940313 |



|   |           |           |           |
|---|-----------|-----------|-----------|
| H | 1.027997  | -0.585270 | 4.079980  |
| H | 2.471852  | 0.366657  | 3.826360  |
| H | 1.922716  | 0.787800  | 1.490240  |
| H | 1.884115  | -0.954943 | 1.820546  |
| H | -0.722380 | 4.399233  | 1.762800  |
| H | -2.104593 | 3.865361  | 1.384187  |
| H | -3.210009 | 2.150674  | 4.302325  |
| H | -3.793180 | 1.588367  | 2.720486  |
| H | -4.092878 | 0.598209  | 4.183041  |
| H | 2.172756  | 2.790314  | 3.252729  |
| H | 0.936684  | 3.537515  | 4.289058  |
| H | 2.195443  | 2.490557  | 5.016779  |
| H | 0.533052  | 0.897366  | -0.345548 |
| H | 0.448462  | -0.890983 | -0.408592 |
| H | -1.048921 | 0.086323  | -0.336748 |

**[Cu(I)LHasc]<sup>+</sup>**

E = -2843.211234

|    |           |           |           |
|----|-----------|-----------|-----------|
| C  | 3.442881  | -0.728644 | -0.652674 |
| C  | 2.272996  | -0.155239 | -1.381780 |
| C  | 1.186118  | -0.957768 | -1.286596 |
| C  | 1.598364  | -2.071027 | -0.401707 |
| O  | 2.912074  | -1.927108 | -0.081260 |
| O  | 2.334801  | 1.011355  | -2.053330 |
| O  | 0.011555  | -0.787986 | -1.826467 |
| Cu | -1.365892 | -0.151049 | -0.632563 |
| N  | -3.237505 | 0.977768  | -0.737762 |
| C  | -4.216173 | -0.040255 | -0.344680 |
| C  | -3.846619 | -0.744534 | 0.962970  |
| N  | -2.471900 | -1.251997 | 0.954982  |
| C  | -1.674966 | -0.887910 | 2.126163  |
| C  | -1.482771 | 0.623466  | 2.280933  |
| N  | -0.958051 | 1.257631  | 1.067469  |
| C  | -1.703144 | 2.426728  | 0.607903  |
| C  | -3.142413 | 2.100754  | 0.208349  |
| O  | 0.958982  | -3.004496 | 0.027269  |
| C  | 4.037985  | 0.120683  | 0.464724  |
| O  | 5.108946  | -0.590770 | 1.027876  |
| C  | -2.405885 | -2.678215 | 0.661265  |
| C  | 4.538504  | 1.477639  | -0.020080 |
| O  | 5.241743  | 2.034319  | 1.069622  |
| C  | 0.473262  | 1.505508  | 1.138884  |
| C  | -3.444297 | 1.437203  | -2.107190 |
| H  | -3.983403 | -0.058421 | 1.809679  |
| H  | -4.569046 | -1.561164 | 1.133990  |
| H  | -4.256655 | -0.784002 | -1.155618 |

|   |           |           |           |
|---|-----------|-----------|-----------|
| H | -5.235100 | 0.386467  | -0.248121 |
| H | -3.734375 | 1.873867  | 1.105040  |
| H | -3.600116 | 3.009697  | -0.217607 |
| H | -1.168662 | 2.828173  | -0.267598 |
| H | -1.722035 | 3.234884  | 1.368088  |
| H | -2.434441 | 1.095827  | 2.560849  |
| H | -0.811408 | 0.799932  | 3.139049  |
| H | -0.690103 | -1.365986 | 2.002924  |
| H | -2.112386 | -1.286401 | 3.065115  |
| H | 4.263368  | -1.016111 | -1.334442 |
| H | 3.242374  | 0.289930  | 1.218032  |
| H | 5.202542  | 1.331757  | -0.891484 |
| H | 3.695389  | 2.112805  | -0.334912 |
| H | 5.817405  | 2.734337  | 0.748863  |
| H | 5.637163  | 0.079745  | 1.484481  |
| H | -1.360666 | -2.973078 | 0.494170  |
| H | -2.835795 | -3.294068 | 1.477343  |
| H | -2.968344 | -2.889906 | -0.259657 |
| H | 0.989736  | 0.582744  | 1.437469  |
| H | 0.854479  | 1.789624  | 0.147143  |
| H | 0.733550  | 2.302170  | 1.864813  |
| H | -2.647523 | 2.140752  | -2.386319 |
| H | -3.399088 | 0.584410  | -2.798818 |
| H | -4.420988 | 1.944738  | -2.236173 |
| H | 1.449310  | 1.151063  | -2.423353 |

**[Cu(I)LDHA]<sup>+</sup>**

E = -2842.433679

|    |           |           |           |
|----|-----------|-----------|-----------|
| C  | -1.255477 | 1.487085  | -0.378745 |
| C  | -2.342253 | 2.500541  | -0.124314 |
| O  | -3.516763 | 1.887855  | -0.322966 |
| C  | -3.418575 | 0.500253  | -0.704159 |
| C  | -1.933192 | 0.201183  | -0.719411 |
| O  | -2.225677 | 3.645818  | 0.194410  |
| C  | -4.233845 | -0.351258 | 0.263244  |
| O  | -5.551505 | 0.112237  | 0.218569  |
| O  | -1.371259 | -0.841242 | -0.946368 |
| Cu | 1.274978  | 0.310872  | -0.246598 |
| N  | 1.351287  | -1.049906 | 1.385653  |
| C  | 1.404777  | -2.318333 | 0.638712  |
| C  | 2.455697  | -2.297829 | -0.469793 |
| N  | 2.350145  | -1.100535 | -1.335932 |
| C  | 3.642147  | -0.421923 | -1.547910 |
| C  | 4.218397  | 0.171107  | -0.260721 |
| N  | 3.239244  | 0.993757  | 0.467809  |
| C  | 3.114526  | 0.665812  | 1.891600  |

|   |           |           |           |
|---|-----------|-----------|-----------|
| C | 2.590207  | -0.750340 | 2.134303  |
| O | -0.049357 | 1.679016  | -0.345710 |
| C | -4.199409 | -1.834421 | -0.102728 |
| O | -5.158216 | -2.438912 | 0.732255  |
| C | 1.691405  | -1.413881 | -2.608545 |
| C | 3.433814  | 2.422856  | 0.241160  |
| C | 0.167963  | -0.968859 | 2.241866  |
| H | 4.582990  | -0.630629 | 0.394960  |
| H | 5.111729  | 0.762115  | -0.520537 |
| H | 3.467322  | 0.384623  | -2.275890 |
| H | 4.383607  | -1.109011 | -1.997099 |
| H | 3.463325  | -2.342863 | -0.037377 |
| H | 2.352700  | -3.215289 | -1.069925 |
| H | 0.409512  | -2.475590 | 0.198110  |
| H | 1.606159  | -3.174557 | 1.309761  |
| H | 3.359268  | -1.486889 | 1.868067  |
| H | 2.424572  | -0.879469 | 3.215639  |
| H | 2.415048  | 1.393051  | 2.331749  |
| H | 4.077047  | 0.781192  | 2.426952  |
| H | -3.832948 | 0.404288  | -1.720892 |
| H | -3.803248 | -0.226566 | 1.277852  |
| H | -4.462234 | -1.951701 | -1.169443 |
| H | -3.192229 | -2.254345 | 0.052186  |
| H | -5.405821 | -3.292473 | 0.364779  |
| H | -6.083132 | -0.619828 | 0.565211  |
| H | 2.599349  | 2.987586  | 0.679860  |
| H | 4.379993  | 2.789196  | 0.682483  |
| H | 3.451109  | 2.627019  | -0.838400 |
| H | 0.112532  | 0.025546  | 2.705907  |
| H | -0.739820 | -1.122873 | 1.643426  |
| H | 0.188482  | -1.730213 | 3.042937  |
| H | 0.716206  | -1.877198 | -2.411965 |
| H | 1.523803  | -0.489853 | -3.178320 |
| H | 2.300712  | -2.103920 | -3.220271 |

**[Cu(II)L]<sup>2+</sup>**

E = -2159.359233

|    |           |           |           |
|----|-----------|-----------|-----------|
| C  | 1.401557  | -1.106547 | 1.104777  |
| N  | 1.722945  | -0.061646 | 0.100417  |
| Cu | -0.037957 | -0.002382 | -1.076019 |
| N  | -0.810437 | 1.427108  | 0.109193  |
| C  | 0.259319  | 1.701893  | 1.113459  |
| C  | 1.662306  | 1.311103  | 0.644031  |
| C  | 0.320941  | -2.071710 | 0.616763  |
| N  | -0.888368 | -1.373558 | 0.107748  |
| C  | -1.649187 | -0.640290 | 1.161268  |

|   |           |           |           |
|---|-----------|-----------|-----------|
| C | -2.001820 | 0.760612  | 0.692806  |
| C | 3.001856  | -0.319929 | -0.577813 |
| C | -1.169913 | 2.634964  | -0.656242 |
| C | -1.757829 | -2.268886 | -0.680191 |
| H | 1.101486  | -0.632825 | 2.048015  |
| H | 2.298103  | -1.695834 | 1.344579  |
| H | 0.709377  | -2.684482 | -0.209264 |
| H | 0.036134  | -2.760071 | 1.428870  |
| H | -1.046532 | -0.615227 | 2.076152  |
| H | -2.564597 | -1.193935 | 1.410763  |
| H | -2.771483 | 0.721128  | -0.090295 |
| H | -2.407479 | 1.357646  | 1.525380  |
| H | 0.007501  | 1.176795  | 2.041399  |
| H | 0.255135  | 2.772809  | 1.359560  |
| H | 2.001009  | 1.991348  | -0.151088 |
| H | 2.353827  | 1.438404  | 1.494765  |
| H | -2.624763 | -1.707205 | -1.048904 |
| H | -1.202330 | -2.682399 | -1.531458 |
| H | -2.108028 | -3.099637 | -0.047658 |
| H | -0.265447 | 3.080800  | -1.089241 |
| H | -1.867069 | 2.374568  | -1.462637 |
| H | -1.646702 | 3.370417  | 0.010547  |
| H | 3.147831  | 0.413462  | -1.381164 |
| H | 3.845887  | -0.253012 | 0.128724  |
| H | 2.985173  | -1.322905 | -1.022705 |

**[Cu(II)L(H<sub>2</sub>O)]<sup>2+</sup>**

E = -2235.756523

|    |           |           |           |
|----|-----------|-----------|-----------|
| C  | 1.732132  | 0.750197  | -1.237677 |
| N  | 1.494238  | -0.538368 | -0.541347 |
| Cu | 0.016665  | -0.143377 | 0.898535  |
| O  | 0.160269  | -1.735772 | 2.044272  |
| C  | 1.299651  | 1.920033  | -0.365822 |
| N  | -0.065561 | 1.696787  | 0.180611  |
| C  | -1.125310 | 1.757820  | -0.869891 |
| C  | -2.139108 | 0.633687  | -0.718775 |
| N  | -1.466017 | -0.666092 | -0.523820 |
| C  | -0.669327 | -1.096993 | -1.699506 |
| C  | 0.756443  | -1.531981 | -1.347563 |
| C  | 2.731093  | -1.105344 | 0.014948  |
| C  | -2.403927 | -1.710015 | -0.090333 |
| C  | -0.362767 | 2.612584  | 1.300915  |
| H  | 1.194615  | 0.751699  | -2.193885 |
| H  | 2.795933  | 0.859937  | -1.492113 |
| H  | 1.980892  | 2.026121  | 0.490175  |
| H  | 1.331447  | 2.865788  | -0.930335 |

|   |           |           |           |
|---|-----------|-----------|-----------|
| H | -0.642404 | 1.716654  | -1.852285 |
| H | -1.634670 | 2.730209  | -0.821572 |
| H | -2.776313 | 0.809224  | 0.159865  |
| H | -2.800229 | 0.616692  | -1.602271 |
| H | -0.649415 | -0.289045 | -2.440791 |
| H | -1.166439 | -1.941431 | -2.198391 |
| H | 0.728964  | -2.462197 | -0.761194 |
| H | 1.297038  | -1.753550 | -2.283634 |
| H | -0.624548 | -2.100559 | 2.476854  |
| H | 0.877181  | -1.783110 | 2.692841  |
| H | -1.373024 | 2.413906  | 1.680843  |
| H | 0.365948  | 2.465842  | 2.108822  |
| H | -0.308400 | 3.657900  | 0.958643  |
| H | -1.856278 | -2.643154 | 0.096165  |
| H | -2.904077 | -1.400703 | 0.836519  |
| H | -3.169834 | -1.898599 | -0.860908 |
| H | 2.493168  | -1.990904 | 0.617905  |
| H | 3.423482  | -1.400073 | -0.790464 |
| H | 3.222917  | -0.362769 | 0.656006  |

**[Cu(II)L(H<sub>2</sub>O)<sub>2</sub>]<sup>2+</sup>**

E = -2312.136702

|    |           |           |           |
|----|-----------|-----------|-----------|
| C  | -1.137224 | 0.297023  | -1.996693 |
| N  | -0.323754 | 1.229386  | -1.192983 |
| Cu | -0.071007 | 0.231381  | 0.763005  |
| O  | -1.604339 | 0.885753  | 1.986958  |
| C  | -1.929351 | -0.669010 | -1.118785 |
| N  | -1.086440 | -1.333821 | -0.094306 |
| C  | -0.086152 | -2.261377 | -0.692368 |
| C  | 1.284634  | -2.059128 | -0.075550 |
| N  | 1.635651  | -0.621168 | -0.041477 |
| C  | 1.812295  | -0.040133 | -1.402799 |
| C  | 1.090661  | 1.290778  | -1.587899 |
| O  | 0.919879  | 1.758345  | 1.677442  |
| C  | -0.913221 | 2.568345  | -1.120684 |
| C  | 2.834965  | -0.399560 | 0.783328  |
| C  | -1.923439 | -2.040206 | 0.893794  |
| H  | -0.492115 | -0.255666 | -2.691845 |
| H  | -1.847086 | 0.845394  | -2.634185 |
| H  | -2.722074 | -0.128146 | -0.583307 |
| H  | -2.427141 | -1.427411 | -1.745929 |
| H  | -0.053670 | -2.100160 | -1.775750 |
| H  | -0.406775 | -3.302966 | -0.551775 |
| H  | 1.297254  | -2.426234 | 0.960807  |
| H  | 2.042784  | -2.632955 | -0.634789 |
| H  | 1.469087  | -0.767717 | -2.147296 |

|   |           |           |           |
|---|-----------|-----------|-----------|
| H | 2.883135  | 0.106254  | -1.602845 |
| H | 1.567164  | 2.060508  | -0.963007 |
| H | 1.209087  | 1.607409  | -2.640232 |
| H | 0.289953  | 2.269768  | 2.205584  |
| H | 1.683214  | 1.608292  | 2.251129  |
| H | -1.748539 | 0.496695  | 2.860167  |
| H | -2.433099 | 1.313924  | 1.736365  |
| H | -1.286707 | -2.491430 | 1.665681  |
| H | -2.611778 | -1.334273 | 1.370088  |
| H | -2.506613 | -2.833141 | 0.399889  |
| H | 3.102395  | 0.664519  | 0.769086  |
| H | 2.649350  | -0.722227 | 1.816629  |
| H | 3.685733  | -0.973924 | 0.383125  |
| H | -0.370876 | 3.172455  | -0.380527 |
| H | -0.873237 | 3.083416  | -2.096813 |
| H | -1.964233 | 2.499943  | -0.810300 |

**[Cu(II)L(H<sub>2</sub>O)<sub>3</sub>]<sup>2+</sup>**

E = -2388.50488020

|    |           |           |           |
|----|-----------|-----------|-----------|
| Cu | -0.366972 | 0.070410  | -0.553719 |
| O  | -2.692359 | 0.232090  | -0.950191 |
| H  | -3.043606 | 0.943007  | -1.500937 |
| H  | -3.463835 | -0.123008 | -0.492404 |
| N  | 1.879963  | -0.022525 | -0.304048 |
| C  | 2.610340  | -0.118930 | -1.566717 |
| N  | -0.358876 | -1.505741 | 0.794601  |
| C  | -1.460520 | -2.445315 | 0.527162  |
| N  | -0.311041 | 1.294222  | 1.111879  |
| C  | -1.012669 | 2.563583  | 0.868341  |
| O  | -0.212728 | 1.591532  | -1.947775 |
| O  | -0.669593 | -1.050183 | -2.270318 |
| C  | 2.119738  | -1.177167 | 0.575727  |
| C  | 0.950422  | -2.159597 | 0.564302  |
| C  | 2.081330  | 1.280857  | 0.337226  |
| C  | 1.109898  | 1.527926  | 1.487055  |
| C  | -0.482978 | -0.931406 | 2.161412  |
| C  | -1.041610 | 0.478192  | 2.105979  |
| H  | 2.322565  | -0.832760 | 1.598317  |
| H  | 3.026331  | -1.722779 | 0.271069  |
| H  | 0.892566  | -2.661113 | -0.412155 |
| H  | 1.115862  | -2.947246 | 1.319052  |
| H  | 0.498571  | -0.944344 | 2.648751  |
| H  | -1.134316 | -1.563590 | 2.781212  |
| H  | -2.096137 | 0.456714  | 1.796456  |
| H  | -1.001208 | 0.946005  | 3.104376  |
| H  | 1.360510  | 0.891705  | 2.343688  |

H 1.231950 2.561999 1.840116  
H 1.935631 2.047752 -0.437719  
H 3.111565 1.397884 0.721817  
H -0.285084 1.223081 -2.839406  
H -0.687856 2.432022 -1.961066  
H -1.622222 -1.158846 -2.408337  
H -0.226310 -1.820672 -2.646302  
H -0.428366 3.179908 0.173752  
H -2.002430 2.361924 0.439853  
H -1.134300 3.125454 1.808451  
H -2.421337 -1.960392 0.737345  
H -1.441167 -2.759309 -0.522100  
H -1.370749 -3.336174 1.168994  
H 2.279025 0.677205 -2.246747  
H 3.701559 -0.027274 -1.417912  
H 2.408383 -1.087094 -2.043988

**[Cu(II)LAsc], conformer 1**

E = -2842.60944767  
C 1.327592 1.549608 0.248253  
C 2.433026 2.496354 0.011908  
O 3.609347 1.875401 0.280199  
C 3.409352 0.517589 0.684499  
C 1.898707 0.314865 0.687844  
O 2.398822 3.646504 -0.353492  
C 4.163912 -0.404545 -0.263143  
O 5.524327 -0.061377 -0.223110  
O 1.323543 -0.732219 1.006314  
O 0.095929 1.837554 0.092875  
Cu -1.245051 0.458215 0.141678  
N -1.352100 -1.262271 -1.218828  
C -1.311090 -2.343657 -0.230986  
C -2.341154 -2.163773 0.885237  
N -2.289127 -0.828845 1.508535  
C -3.599519 -0.179343 1.617511  
C -4.226519 0.126031 0.254594  
N -3.308553 0.832659 -0.645767  
C -3.193990 0.246611 -1.981345  
C -2.610609 -1.168454 -1.969485  
C 4.009240 -1.878181 0.100302  
O 4.915738 -2.569561 -0.732468  
C -1.575575 -0.853161 2.783117  
C -3.560902 2.266311 -0.685916  
C -0.182879 -1.262670 -2.089198  
H -4.560444 -0.806522 -0.219937  
H -5.147007 0.711907 0.419306

H -3.450710 0.762971 2.167099  
H -4.310763 -0.788549 2.210510  
H -3.352769 -2.343808 0.497242  
H -2.176400 -2.949981 1.640899  
H -0.302988 -2.333583 0.206880  
H -1.466529 -3.336556 -0.699895  
H -3.342024 -1.871003 -1.547342  
H -2.468754 -1.492878 -3.014535  
H -2.531171 0.902734 -2.567091  
H -4.169399 0.223867 -2.509087  
H 3.820008 0.403054 1.701819  
H 3.750830 -0.249547 -1.282122  
H 4.261678 -2.016692 1.167373  
H 2.969948 -2.209129 -0.050348  
H 5.076470 -3.443662 -0.365888  
H 5.983036 -0.840363 -0.569740  
H -2.762432 2.770983 -1.248189  
H -4.533358 2.511245 -1.157729  
H -3.561060 2.672416 0.335523  
H -0.206472 -0.379604 -2.743616  
H 0.728938 -1.210267 -1.479024  
H -0.134154 -2.167776 -2.726683  
H -0.566516 -1.255521 2.625244  
H -1.471167 0.170687 3.169327  
H -2.101072 -1.465396 3.542075

**[Cu(II)LAsc], conformer 2**

E = -2842.60131571  
C -1.455652 0.545630 -0.423827  
O -2.613280 1.132222 -0.740860  
C -3.683713 0.173439 -0.746408  
C -3.035573 -1.165249 -0.390503  
C -1.626823 -0.893381 -0.186817  
C -4.767544 0.639038 0.213256  
C -5.964143 -0.306306 0.245956  
O -6.942237 0.351625 1.022410  
O -3.639306 -2.231958 -0.309153  
O -0.699659 -1.681237 0.127030  
Cu 1.338112 0.372161 -0.018585  
O -0.426056 1.214717 -0.367286  
N 3.236542 1.533843 0.043405  
C 2.976556 2.921825 -0.313303  
C 4.165477 0.883791 -0.889684  
C 3.456818 0.006503 -1.925619  
N 2.520001 -0.941646 -1.324262  
C 1.623622 -1.549264 -2.299084



C 3.589119 1.376137 1.455003  
C 3.549988 -0.080504 1.923844  
N 2.291265 -0.756212 1.583773  
C 1.379280 -0.845566 2.718549  
C 2.460336 -2.050876 0.916621  
C 3.148223 -1.937657 -0.445822  
O -5.197268 1.912624 -0.191439  
H 4.889243 0.281023 -0.324694  
H 4.771577 1.633776 -1.426483  
H 2.877629 0.649607 -2.606529  
H 4.225361 -0.502656 -2.542782  
H 4.210107 -1.688713 -0.313502  
H 3.142254 -2.934635 -0.919152  
H 1.452296 -2.464013 0.773858  
H 3.033822 -2.762259 1.545579  
H 4.392592 -0.635366 1.489084  
H 3.723717 -0.098594 3.013300  
H 2.861084 1.960820 2.038947  
H 4.591023 1.795528 1.680712  
H -4.092100 0.144846 -1.770124  
H -4.325064 0.681144 1.230424  
H -6.320301 -0.473146 -0.786933  
H -5.678230 -1.281018 0.670448  
H -7.799978 -0.047658 0.851684  
H -6.062045 2.024560 0.229074  
H 2.179053 3.329671 0.323883  
H 3.875212 3.561548 -0.204339  
H 2.636310 2.979534 -1.356916  
H 1.223975 0.153679 3.149822  
H 0.408632 -1.224835 2.371288  
H 1.766202 -1.511803 3.515697  
H 0.872760 -2.153954 -1.772749  
H 1.088852 -0.763282 -2.852028  
H 2.162715 -2.187657 -3.027600

**[Cu(II)LAsc], conformer 3**

E = -2842.59815556  
C -2.343345 0.048532 -0.721149  
O -1.195504 -0.735809 -0.360978  
C -1.557515 -1.981652 0.115830  
C -3.017558 -2.142818 -0.025936  
C -3.529698 -0.901150 -0.567126  
O -0.713817 -2.725874 0.550540  
Cu 0.731279 -0.076632 -0.308772  
N 2.059919 1.555337 -0.777263  
C 2.100935 2.236279 0.523371  
C 2.416731 1.296291 1.691277

N 1.553096 0.111340 1.720959  
C 0.450617 0.240729 2.661906  
O -3.647597 -3.180891 0.286524  
O -4.688276 -0.594063 -0.845905  
C -2.405590 1.265940 0.187893  
C -3.560483 2.197530 -0.155818  
O -3.368315 3.344855 0.642386  
N 2.513918 -1.319479 -0.659621  
C 2.145734 -2.616234 -1.215632  
O -1.194860 1.972597 0.070618  
C 2.254541 -1.167742 1.830654  
C 3.182003 -1.447296 0.645018  
C 3.236284 -0.485528 -1.621866  
C 3.351599 0.973753 -1.178204  
C 1.495424 2.411998 -1.817326  
H 3.468279 0.981481 1.648367  
H 2.326004 1.872534 2.628240  
H 1.108607 2.680854 0.681255  
H 2.838280 3.064243 0.523067  
H 4.062723 1.054572 -0.345232  
H 3.802085 1.554009 -2.000669  
H 2.682678 -0.530938 -2.572582  
H 4.254383 -0.875583 -1.825327  
H 4.047936 -0.772037 0.679320  
H 3.601602 -2.460286 0.768168  
H 1.482983 -1.951415 1.869721  
H 2.847969 -1.238568 2.765417  
H -2.214561 0.365195 -1.768587  
H -2.532125 0.905076 1.228530  
H -3.515925 2.445263 -1.231692  
H -4.523804 1.702677 0.042291  
H -3.873264 4.075092 0.273223  
H -1.384215 2.860727 0.409052  
H -0.227459 -0.618351 2.556680  
H 0.794263 0.290739 3.714455  
H -0.121657 1.150752 2.431893  
H 1.507914 -3.152375 -0.501088  
H 1.564640 -2.473868 -2.138106  
H 3.032722 -3.236926 -1.452708  
H 1.457646 1.861396 -2.767796  
H 0.469536 2.689096 -1.542023  
H 2.095999 3.330272 -1.970829

**[Cu(II)LHAsc]<sup>+</sup>**

E = -2843.055138

C -1.156377 1.048626 -0.984238  
C -1.786950 2.157942 -0.233600

|    |           |           |           |
|----|-----------|-----------|-----------|
| O  | -3.119152 | 1.934412  | -0.155501 |
| C  | -3.453303 | 0.673544  | -0.733758 |
| C  | -2.147648 | 0.176172  | -1.291667 |
| O  | -1.274368 | 3.133746  | 0.254662  |
| C  | -4.094075 | -0.187402 | 0.355443  |
| O  | -5.295495 | 0.429591  | 0.722689  |
| O  | -1.979784 | -0.966722 | -1.963686 |
| O  | 0.113360  | 1.039165  | -1.288371 |
| Cu | 1.497846  | 0.017549  | -0.653205 |
| N  | 0.946665  | -1.234289 | 1.006317  |
| C  | 1.770273  | -2.423395 | 0.726574  |
| C  | 3.201657  | -2.047240 | 0.368233  |
| N  | 3.256405  | -0.971618 | -0.657891 |
| C  | 4.236159  | 0.089141  | -0.317926 |
| C  | 3.793001  | 0.892471  | 0.901660  |
| N  | 2.389330  | 1.330865  | 0.766201  |
| C  | 1.534807  | 1.030488  | 1.926372  |
| C  | 1.385600  | -0.469369 | 2.195249  |
| C  | -4.375682 | -1.624574 | -0.074684 |
| O  | -5.136271 | -2.185249 | 0.967724  |
| C  | 3.509277  | -1.527191 | -1.999129 |
| C  | 2.272841  | 2.733022  | 0.352659  |
| C  | -0.475535 | -1.573521 | 1.072107  |
| H  | 3.908670  | 0.301923  | 1.819654  |
| H  | 4.461178  | 1.758757  | 1.020372  |
| H  | 4.309258  | 0.753448  | -1.191517 |
| H  | 5.236416  | -0.345265 | -0.150742 |
| H  | 3.743780  | -1.713196 | 1.260609  |
| H  | 3.735947  | -2.938546 | 0.008410  |
| H  | 1.299391  | -2.954373 | -0.114161 |
| H  | 1.780883  | -3.119918 | 1.584374  |
| H  | 2.331078  | -0.884411 | 2.567008  |
| H  | 0.665052  | -0.600245 | 3.016645  |
| H  | 0.548490  | 1.470631  | 1.712300  |
| H  | 1.917503  | 1.516219  | 2.842190  |
| H  | -4.200231 | 0.848461  | -1.527224 |
| H  | -3.388231 | -0.215048 | 1.210749  |
| H  | -4.944115 | -1.621063 | -1.023431 |
| H  | -3.433279 | -2.177590 | -0.229445 |
| H  | -5.589141 | -2.969997 | 0.645269  |
| H  | -5.802166 | -0.257777 | 1.178841  |
| H  | 1.221680  | 2.958103  | 0.130144  |
| H  | 2.639391  | 3.411289  | 1.143197  |
| H  | 2.867067  | 2.897051  | -0.556429 |
| H  | -1.058750 | -0.663093 | 1.260463  |
| H  | -0.800577 | -1.998913 | 0.113329  |

|   |           |           |           |
|---|-----------|-----------|-----------|
| H | -0.681292 | -2.296687 | 1.880455  |
| H | 2.750648  | -2.286121 | -2.231475 |
| H | 3.452806  | -0.729412 | -2.751607 |
| H | 4.507209  | -1.992953 | -2.047876 |
| H | -2.813604 | -1.306726 | -2.309450 |

**[Cu(II)LDHA]<sup>2+</sup>, conformer 3**

E = -2842.239742

|    |           |           |           |
|----|-----------|-----------|-----------|
| C  | -1.244612 | 1.769617  | -0.176433 |
| C  | -2.524352 | 2.591307  | -0.081645 |
| O  | -3.525914 | 1.755236  | -0.378550 |
| C  | -3.162732 | 0.393210  | -0.707422 |
| C  | -1.676446 | 0.372998  | -0.558219 |
| O  | -2.640317 | 3.739886  | 0.199004  |
| C  | -3.941316 | -0.587692 | 0.171819  |
| O  | -5.291980 | -0.367813 | -0.087900 |
| O  | -0.852706 | -0.506052 | -0.671291 |
| Cu | 1.126145  | 0.185556  | -0.296764 |
| N  | 1.422871  | -0.658223 | 1.674971  |
| C  | 1.491762  | -2.080381 | 1.293416  |
| C  | 2.386429  | -2.327268 | 0.079642  |
| N  | 2.081094  | -1.438119 | -1.077560 |
| C  | 3.294150  | -0.833264 | -1.677106 |
| C  | 3.943901  | 0.131394  | -0.702487 |
| N  | 2.930655  | 1.054712  | -0.115230 |
| C  | 3.053495  | 1.201673  | 1.357976  |
| C  | 2.721319  | -0.088626 | 2.103386  |
| O  | -0.087933 | 2.039983  | 0.009303  |
| C  | -3.576380 | -2.040664 | -0.137221 |
| O  | -4.520240 | -2.803167 | 0.570626  |
| C  | 1.271005  | -2.133800 | -2.093541 |
| C  | 2.949398  | 2.365542  | -0.795088 |
| C  | 0.362437  | -0.414907 | 2.659956  |
| H  | 4.445584  | -0.405545 | 0.110177  |
| H  | 4.724674  | 0.711018  | -1.213609 |
| H  | 2.981607  | -0.306823 | -2.589951 |
| H  | 4.009741  | -1.616107 | -1.977706 |
| H  | 3.440985  | -2.202863 | 0.350958  |
| H  | 2.277800  | -3.376212 | -0.229709 |
| H  | 0.464686  | -2.410787 | 1.077596  |
| H  | 1.860366  | -2.706359 | 2.125012  |
| H  | 3.515767  | -0.832997 | 1.964309  |
| H  | 2.711299  | 0.129784  | 3.181127  |
| H  | 2.362168  | 2.001204  | 1.660941  |
| H  | 4.070822  | 1.538044  | 1.616334  |
| H  | -3.426553 | 0.222427  | -1.765421 |

|   |           |           |           |
|---|-----------|-----------|-----------|
| H | -3.696758 | -0.375579 | 1.231189  |
| H | -3.650307 | -2.212345 | -1.225645 |
| H | -2.543306 | -2.264513 | 0.179895  |
| H | -4.562882 | -3.687377 | 0.194023  |
| H | -5.738067 | -1.178621 | 0.200437  |
| H | 2.142421  | 3.000089  | -0.411244 |
| H | 3.914412  | 2.864776  | -0.616413 |
| H | 2.813916  | 2.222621  | -1.874581 |
| H | 0.294155  | 0.658935  | 2.878272  |
| H | -0.605098 | -0.753967 | 2.264036  |
| H | 0.557439  | -0.954341 | 3.602579  |
| H | 0.380776  | -2.568457 | -1.623980 |
| H | 0.956385  | -1.426245 | -2.870921 |
| H | 1.861803  | -2.938878 | -2.558530 |

**[Cu(I)LNO<sub>2</sub>], conformer 1**

E = -2364.621904

|    |           |           |           |
|----|-----------|-----------|-----------|
| N  | 0.033728  | -0.090553 | -0.083193 |
| C  | 0.023260  | -0.139858 | 1.379273  |
| C  | 1.425311  | -0.067490 | 1.987780  |
| N  | 2.352771  | -1.046227 | 1.401999  |
| C  | 3.632537  | -0.477557 | 0.971796  |
| C  | 3.482977  | 0.544955  | -0.157212 |
| N  | 2.687410  | 0.037877  | -1.282259 |
| C  | 1.617963  | 0.936218  | -1.719814 |
| C  | 0.551427  | 1.163136  | -0.645419 |
| Cu | 1.512235  | -1.671027 | -0.526281 |
| O  | 1.242151  | -3.437808 | -1.284645 |
| N  | 0.877614  | -3.465852 | -2.509234 |
| O  | 0.724439  | -4.580018 | -2.969509 |
| C  | -1.246709 | -0.473777 | -0.663325 |
| C  | 3.517914  | -0.421936 | -2.387805 |
| C  | 2.527086  | -2.217017 | 2.253772  |
| H  | 1.834681  | 0.944047  | 1.864139  |
| H  | 1.339584  | -0.212670 | 3.078061  |
| H  | -0.445787 | -1.093142 | 1.669076  |
| H  | -0.596894 | 0.668749  | 1.817094  |
| H  | 0.961201  | 1.784590  | 0.162220  |
| H  | -0.263356 | 1.762901  | -1.085927 |
| H  | 1.147495  | 0.475743  | -2.602582 |
| H  | 2.011416  | 1.921226  | -2.044027 |
| H  | 3.024666  | 1.465207  | 0.229533  |
| H  | 4.491572  | 0.843163  | -0.491134 |
| H  | 4.257196  | -1.313465 | 0.620238  |
| H  | 4.176357  | -0.002306 | 1.813303  |
| H  | 3.121340  | -2.976952 | 1.727109  |

|   |           |           |           |
|---|-----------|-----------|-----------|
| H | 3.033950  | -1.971421 | 3.208080  |
| H | 1.546659  | -2.656810 | 2.484416  |
| H | -2.062584 | 0.222431  | -0.384228 |
| H | -1.166500 | -0.491657 | -1.759344 |
| H | -1.518470 | -1.485959 | -0.331383 |
| H | 4.070318  | 0.406511  | -2.874429 |
| H | 4.247500  | -1.158021 | -2.021621 |
| H | 2.892032  | -0.918844 | -3.142461 |

**[Cu(I)LNO<sub>2</sub>], conformer 2**

E = -2364.626131

|    |           |           |           |
|----|-----------|-----------|-----------|
| C  | 0.040252  | 0.014928  | -0.007617 |
| C  | 0.046083  | 0.072608  | 1.520276  |
| N  | 1.396037  | 0.023749  | 2.080652  |
| C  | 2.125412  | -1.223907 | 1.823809  |
| C  | 3.527740  | -0.980575 | 1.258257  |
| N  | 3.528938  | -0.091938 | 0.097234  |
| C  | 2.811072  | -0.603339 | -1.073241 |
| C  | 1.830521  | 0.423118  | -1.646545 |
| N  | 0.947534  | 1.002840  | -0.624053 |
| Cu | 2.341039  | 1.618233  | 0.880821  |
| N  | 3.184416  | 3.115115  | 1.758175  |
| O  | 4.395890  | 3.329889  | 1.630878  |
| O  | 2.547993  | 3.807242  | 2.562391  |
| C  | 0.214024  | 2.158461  | -1.139330 |
| C  | 4.856281  | 0.415446  | -0.225177 |
| C  | 1.439685  | 0.425841  | 3.480462  |
| H  | 0.318034  | -0.992828 | -0.343396 |
| H  | -0.993179 | 0.164190  | -0.361334 |
| H  | -0.408350 | 1.020511  | 1.848690  |
| H  | -0.597431 | -0.742257 | 1.909492  |
| H  | 1.546338  | -1.851683 | 1.132861  |
| H  | 2.220027  | -1.821629 | 2.746457  |
| H  | 4.148136  | -0.501119 | 2.031841  |
| H  | 3.997114  | -1.960030 | 1.033250  |
| H  | 2.275965  | -1.523981 | -0.804250 |
| H  | 3.511834  | -0.899425 | -1.872690 |
| H  | 2.396721  | 1.254234  | -2.094452 |
| H  | 1.249140  | -0.048031 | -2.463562 |
| H  | 0.920904  | 2.921394  | -1.493149 |
| H  | -0.458749 | 1.883298  | -1.974612 |
| H  | -0.389954 | 2.601625  | -0.335780 |
| H  | 0.834791  | -0.236706 | 4.130337  |
| H  | 2.479571  | 0.405476  | 3.835874  |
| H  | 1.078765  | 1.459146  | 3.580466  |
| H  | 5.573483  | -0.395165 | -0.462509 |

|   |          |          |           |
|---|----------|----------|-----------|
| H | 4.790822 | 1.084799 | -1.094731 |
| H | 5.236502 | 1.014762 | 0.613648  |

**[Cu(II)LNO<sub>2</sub>]<sup>+</sup>, conformer 1**

E = -2364.460202

|    |           |           |           |
|----|-----------|-----------|-----------|
| N  | 0.022808  | -0.015126 | -0.048235 |
| C  | 0.001744  | -0.033506 | 1.436597  |
| C  | 1.414733  | -0.076084 | 2.008905  |
| N  | 2.220088  | -1.129235 | 1.351153  |
| C  | 3.528004  | -0.671739 | 0.848112  |
| C  | 3.420832  | 0.380886  | -0.259173 |
| N  | 2.530856  | -0.020674 | -1.373693 |
| C  | 1.544811  | 1.012457  | -1.738253 |
| C  | 0.562827  | 1.259648  | -0.600429 |
| Cu | 1.271354  | -1.503421 | -0.507621 |
| O  | 2.063491  | -3.164890 | -0.929389 |
| N  | 1.761287  | -3.444691 | -2.164170 |
| O  | 2.070786  | -4.544678 | -2.516397 |
| C  | -1.306212 | -0.318328 | -0.614224 |
| C  | 3.287123  | -0.501639 | -2.533397 |
| C  | 2.345553  | -2.338289 | 2.172382  |
| H  | 1.913773  | 0.894266  | 1.890975  |
| H  | 1.357811  | -0.251337 | 3.093209  |
| H  | -0.550612 | -0.934815 | 1.741005  |
| H  | -0.549970 | 0.838427  | 1.825034  |
| H  | 1.044419  | 1.817827  | 0.210591  |
| H  | -0.263805 | 1.892518  | -0.953327 |
| H  | 1.009266  | 0.654388  | -2.629861 |
| H  | 2.034465  | 1.963036  | -2.014133 |
| H  | 3.074267  | 1.335020  | 0.156882  |
| H  | 4.434073  | 0.577926  | -0.639868 |
| H  | 4.049646  | -1.560458 | 0.463127  |
| H  | 4.145078  | -0.259040 | 1.665568  |
| H  | 2.807798  | -3.137071 | 1.578066  |
| H  | 2.959734  | -2.148663 | 3.069177  |
| H  | 1.348660  | -2.674138 | 2.486697  |
| H  | -2.045086 | 0.429430  | -0.284675 |
| H  | -1.250558 | -0.305356 | -1.710621 |
| H  | -1.636592 | -1.313008 | -0.287016 |
| H  | 3.874547  | 0.312433  | -2.991132 |
| H  | 3.969559  | -1.301433 | -2.218071 |
| H  | 2.597931  | -0.914256 | -3.281738 |

**[Cu(II)LNO<sub>2</sub>]<sup>+</sup>, conformer 2**

E = -2364.463565

|   |          |          |          |
|---|----------|----------|----------|
| C | 0.044050 | 0.026833 | 0.015260 |
|---|----------|----------|----------|

|    |           |           |           |
|----|-----------|-----------|-----------|
| C  | 0.051659  | 0.084734  | 1.541031  |
| N  | 1.412480  | 0.049964  | 2.092727  |
| C  | 2.140500  | -1.205093 | 1.830326  |
| C  | 3.532676  | -0.954917 | 1.249323  |
| N  | 3.511066  | -0.030077 | 0.093117  |
| C  | 2.801659  | -0.583480 | -1.090727 |
| C  | 1.813540  | 0.423794  | -1.666715 |
| N  | 0.969741  | 1.012868  | -0.602429 |
| Cu | 2.383502  | 1.522797  | 0.779418  |
| N  | 3.348297  | 2.907822  | 1.772741  |
| O  | 4.256355  | 3.455385  | 2.319804  |
| O  | 2.212419  | 3.429471  | 1.631493  |
| C  | 0.249578  | 2.206888  | -1.072655 |
| C  | 4.865647  | 0.433563  | -0.251235 |
| C  | 1.448858  | 0.435124  | 3.503675  |
| H  | 0.315048  | -0.978590 | -0.329003 |
| H  | -0.980340 | 0.198785  | -0.346500 |
| H  | -0.411956 | 1.024487  | 1.877712  |
| H  | -0.573885 | -0.739737 | 1.930204  |
| H  | 1.552051  | -1.838582 | 1.153831  |
| H  | 2.253393  | -1.792926 | 2.754671  |
| H  | 4.176622  | -0.496749 | 2.014444  |
| H  | 3.996411  | -1.915153 | 0.965195  |
| H  | 2.288670  | -1.508021 | -0.800328 |
| H  | 3.524929  | -0.871581 | -1.867180 |
| H  | 2.359157  | 1.249953  | -2.145392 |
| H  | 1.195389  | -0.055901 | -2.444829 |
| H  | 0.965921  | 2.959573  | -1.427354 |
| H  | -0.440093 | 1.951523  | -1.894051 |
| H  | -0.326696 | 2.636735  | -0.243178 |
| H  | 0.872523  | -0.263534 | 4.136268  |
| H  | 2.489473  | 0.450171  | 3.855522  |
| H  | 1.034480  | 1.445774  | 3.622971  |
| H  | 5.511793  | -0.416389 | -0.525243 |
| H  | 4.811563  | 1.129101  | -1.098716 |
| H  | 5.306922  | 0.959679  | 0.605243  |
